# Supplementary material for: Synthesis of novel diesters as potential fuel oxygenates and surfactants of renewable origin from carbohydrate-derived 5-(chloromethyl)furfural
Source: Royal Society of Chemistry journal article supplement (doi:10.1039/d4su00563e), 2024-12-20
Supplement: d4su00563e1.pdf [file d4su00563e1.pdf]

## **Synthesis of novel diesters of carbohydrate-derived 5-(chloromethyl)furfural as potential fuel oxygenates and surfactants of renewable origin**

Sandeep Kumar Yadav<sup>1</sup> and Saikat Dutta<sup>1\*</sup>

<sup>1</sup> Department of Chemistry, National Institute of Technology Karnataka (NITK), Surathkal, Mangalore-575025, Karnataka, India.

\* Corresponding author. E-mail: [sdutta@nitk.edu.in](mailto:sdutta@nitk.edu.in)

Number of pages: 66

Number of figures: 105

The calculations for Atom Economy (AE), Carbon Economy (CE), and Product Mass Intensity (PMI) for ethyl 5-(acetoxymethyl)furan-2-carboxylate **1a**.

**Atom economy (AE):** It is a calculation of how many atoms of the reactants present in the final product. The ideal value of AE factor is 100%.

$$\begin{aligned} \text{Atom economy (\%)} &= \frac{\text{MW of product}}{\Sigma (\text{MW of reactants})} \times 100 \\ &= \frac{212.20}{144.55 + 108.57 + 46.07 + 161.24} \times 100\% \\ &= \frac{212.20}{460.43} \times 100\% \\ &= 46\% \end{aligned}$$

**Carbon economy (CE):** Carbon Economy is a calculation which shows the total number of carbon present in the product compared to how much carbon was used to create the product.

$$\begin{aligned} \text{Carbon Economy (\%)} &= \frac{\text{No of carbon atoms in product}}{\Sigma (\text{No of carbon atoms in reactants})} \times 100\% \\ &= \frac{10}{10} \times 100\% \\ &= 100\% \end{aligned}$$

**Product mass intensity (PMI):** PMI is defined as the total mass of the input materials (reactants) including solvent in a chemical reaction divided by the mass of product.

$$\begin{aligned} \text{PMI} &= \frac{\Sigma (\text{Mass of reactants including solvent})}{\text{Mass of the product}} \\ &= \frac{(\text{Mass of reactants for Step 1} + \text{Mass of reagents for Step 2})}{\text{Mass of the product}} \\ &= \frac{\left( \begin{array}{l} \text{Mass of CMF} + \text{Mass of TBHC} + \text{Mass of EtOH} + \text{Mass of EtOAc} + \text{Mass of Na}_2\text{SO}_4 + \\ + \text{Mass of Silica Gel} + \text{Mass of pet ether} + \text{Mass of EtOAc} + (\text{Mass of TEAA} + \text{Mass of EtOAc}) \\ + \text{Mass of Na}_2\text{SO}_4 + \text{Mass of Silica Gel} \end{array} \right)}{\text{Mass of the product}} \\ &= \frac{(0.3 + 0.675 + 1.5 * 0.789 + 1.5 * 0.902 + 0.1 + 7.5 + 1.5 * 0.64 + 1.5 * 0.902) + (0.1 + 2 + 0.415 + 10 * 0.902)}{0.310} \\ &= \frac{(13.424 + 11.535)}{0.310} \\ &= 80.5 \end{aligned}$$

Ethyl 5-(chloromethyl)furan-2-carboxylate (**1**): Light yellow liquid (2.563 g, 83%), <sup>1</sup>H-NMR (CDCl<sub>3</sub>, 400 MHz) δ (ppm): 7.10 (d, 1H, *J* = 3.6 Hz), 6.47 (d, 1H, *J* = 3.6 Hz), 4.59 (s, 2H), 4.35 (q, 2H, *J* = 6.8 Hz), 1.36 (t, 3H, *J* = 6.8 Hz). <sup>13</sup>C-NMR (CDCl<sub>3</sub>, 100 MHz) δ (ppm): 158.6, 154.2, 118.7, 111.5, 61.3, 36.8, 14.4. FTIR (cm<sup>-1</sup>): 2982, 2959, 2918, 2850, 1715, 1534, 1297, 1265, 1210, 1153, 1016.

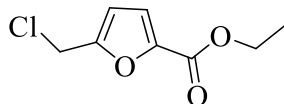

**1**

Ethyl 5-(acetoxymethyl)furan-2-carboxylate (**1a**): Yellow liquid (0.310 g, 85%), <sup>1</sup>H-NMR (CDCl<sub>3</sub>, 400 MHz) δ (ppm): 7.10 (d, 1H, *J* = 3.4 Hz), 6.47 (d, 1H, *J* = 3.4 Hz), 5.06 (s, 2H), 4.34 (q, 2H, *J* = 7.1 Hz), 2.06 (s, 3H), 1.35 (t, 3H, *J* = 7.1 Hz). <sup>13</sup>C-NMR (CDCl<sub>3</sub>, 100 MHz) δ (ppm): 170.5, 158.7, 153.4, 145.1, 118.5, 112.3, 61.2, 58.0, 20.8, 14.4. FTIR (cm<sup>-1</sup>): 2958, 2926, 2855, 1746, 1726, 1600, 1462, 1375, 1300, 1231, 1024.

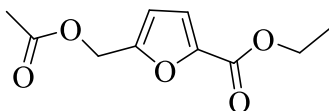

**1a**

Ethyl 5-((propionyloxy)methyl)furan-2-carboxylate (**1b**): Yellow liquid (0.268 g, 80%), <sup>1</sup>H-NMR (CDCl<sub>3</sub>, 400 MHz) δ (ppm): 7.26 (d, 1H, *J* = 3.6 Hz), 6.62 (d, 1H, *J* = 3.6 Hz), 5.23 (s, 2H), 4.50 (q, 2H, *J* = 7.2 Hz), 2.50 (q, 2H, *J* = 7.6 Hz), 1.51 (t, 3H, *J* = 7.2 Hz), 1.28 (t, 3H, *J* = 7.6 Hz). <sup>13</sup>C-NMR (CDCl<sub>3</sub>, 100 MHz) δ (ppm): 173.8, 158.5, 153.5, 145.0, 118.4, 112.0, 61.1, 57.8, 27.3, 14.3, 8.9. FTIR (cm<sup>-1</sup>): 3132, 2983, 2922, 2852, 1728, 1599, 1532, 1298, 1210, 1170, 1137, 1018. HRMS (ESI) calculated for C<sub>11</sub>H<sub>24</sub>O<sub>5</sub> [M+Na]<sup>+</sup> 249.0733, found 249.0739.

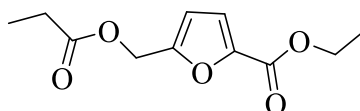

**1b**

Ethyl 5-(((4-oxopentanoyl)oxy)methyl)furan-2-carboxylate (**1c**): Yellow liquid (0.226 g, 88%), <sup>1</sup>H-NMR (CDCl<sub>3</sub>, 400 MHz) δ (ppm): 7.10 (d, 1H, *J* = 3.6 Hz), 6.47 (d, 1H, *J* = 3.6 Hz), 5.08 (s, 2H), 4.34 (q, 2H, *J* = 7.2 Hz), 2.74 (t, 2H, *J* = 6.4 Hz), 2.59 (t, 2H, *J* = 6.4 Hz), 2.16 (s, 3H), 1.35 (t, 3H, *J* = 7.2 Hz). <sup>13</sup>C-NMR (CDCl<sub>3</sub>, 100 MHz) δ (ppm): 2026.5, 172.3, 158.7, 153.3, 145.1, 118.6, 112.2, 61.2, 58.2, 37.9, 29.9, 27.9, 14.4. FTIR (cm<sup>-1</sup>): 2987, 2956, 2920, 2851, 1722, 1539, 1526, 1368, 1302, 1212, 1152, 1023. HRMS (ESI) calculated for C<sub>13</sub>H<sub>16</sub>O<sub>6</sub> [M+Na]<sup>+</sup> 291.0839, found 291.0843.

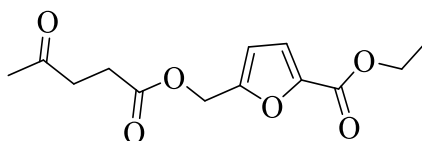

**1c**

Ethyl 5-((benzoyloxy)methyl)furan-2-carboxylate (**1d**): Yellow liquid (0.236 g, 84%), <sup>1</sup>H-NMR (CDCl<sub>3</sub>, 400 MHz) δ (ppm): 8.04 (dd, 2H, *J*<sub>1</sub> = 8.0 Hz, *J*<sub>2</sub> = 1.2 Hz), 7.58-7.54 (m, 1H), 7.43 (t, 2H, *J* = 8.0 Hz), 7.14 (d, 1H, *J* = 3.6 Hz), 6.58 (d, 1H, *J* = 3.6 Hz), 5.34 (s, 2H), 4.37 (q, 2H, *J* = 7.2 Hz), 1.37 (t, 3H, *J* = 7.2 Hz). <sup>13</sup>C-NMR (CDCl<sub>3</sub>, 100 MHz) δ (ppm): 166.1, 158.7, 153.6, 145.2, 133.4, 129.9, 129.6, 128.5, 118.6, 112.5, 61.2, 58.4, 14.4. FTIR (cm<sup>-1</sup>): 3132, 2982, 2935, 1716, 1530, 1450, 1390, 1261, 1209, 1173, 1095, 1061, 709. HRMS (ESI) calculated for C<sub>15</sub>H<sub>14</sub>O<sub>5</sub> [M+H]<sup>+</sup> 275.0914, found 275.0918.

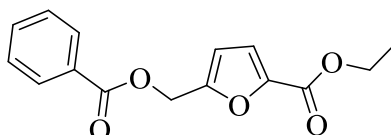

**1d**

Propyl 5-(chloromethyl)furan-2-carboxylate (**2**): Light yellow liquid (2.238 g, 82%), <sup>1</sup>H-NMR (CDCl<sub>3</sub>, 400 MHz) δ (ppm): 7.26 (d, 1H, *J* = 3.6 Hz), 6.64 (d, 1H, *J* = 3.6 Hz), 4.75 (s, 2H), 4.41 (t, 2H, *J* = 6.8 Hz), 1.97-1.88 (m, 2H), 1.15 (t, 3H, *J* = 7.2 Hz). <sup>13</sup>C-NMR (CDCl<sub>3</sub>, 100 MHz) δ (ppm): 158.6, 154.2, 145.2, 118.6, 111.4, 66.8, 36.8, 22.1, 10.4. FTIR (cm<sup>-1</sup>): 2964, 2922, 2853, 1720, 1527, 1298, 1210, 1160, 1054. HRMS (ESI) calculated for C<sub>9</sub>H<sub>11</sub>ClO<sub>3</sub> [M+H]<sup>+</sup> 203.0469, found 203.0469.

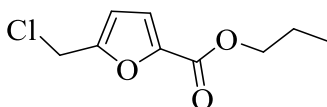

**2**

Propyl 5-(acetoxymethyl)furan-2-carboxylate (**2a**): Yellow liquid (0.290 g, 85%), <sup>1</sup>H-NMR (CDCl<sub>3</sub>, 400 MHz) δ (ppm): 7.11 (d, 2H, *J* = 3.6 Hz), 6.48 (d, 1H, *J* = 3.6 Hz), 5.07 (s, 2H), 4.25 (t, 2H, *J* = 6.8 Hz), 2.08 (s, 3H), 1.80-1.70 (m, 2H), 0.98 (t, 3H, *J* = 7.2 Hz). <sup>13</sup>C-NMR (CDCl<sub>3</sub>, 100 MHz) δ (ppm): 170.5, 158.8, 153.5, 145.1, 118.5, 112.3, 66.7, 58.0, 22.2, 20.8, 10.4. FTIR (cm<sup>-1</sup>): 2970, 2939, 2881, 1744, 1715, 1525, 1375, 1207, 1133, 1020, 760. HRMS (ESI) calculated for C<sub>11</sub>H<sub>14</sub>O<sub>5</sub> [M+Na]<sup>+</sup> 249.0733, found 249.0733.

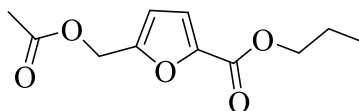

**2a**

Propyl 5-((propionyloxy)methyl)furan-2-carboxylate (**2b**): Yellow liquid (0.196 g, 79%), <sup>1</sup>H-NMR (CDCl<sub>3</sub>, 400 MHz) δ (ppm): 7.10 (d, 1H, *J* = 3.6 Hz), 6.47 (d, 1H, *J* = 3.6 Hz), 5.08 (s, 2H), 4.24 (t, 2H, *J* = 6.8 Hz), 2.35 (q, 2H, *J* = 7.6 Hz), 1.79-1.70 (m, 2H), 1.12 (t, 3H, *J* = 7.6 Hz), 0.97 (t, 3H, *J* = 7.2 Hz). <sup>13</sup>C-NMR (CDCl<sub>3</sub>, 100 MHz) δ (ppm): 174.0, 158.8, 153.7, 145.1, 118.5, 112.1, 66.7, 57.9, 27.4, 22.2, 10.4, 9.0. FTIR (cm<sup>-1</sup>): 2971, 2943, 2882, 1717, 1524, 1293, 1270, 1132, 1081, 761. HRMS (ESI) calculated for C<sub>12</sub>H<sub>16</sub>O<sub>5</sub> [M+Na]<sup>+</sup> 263.0890, found 263.0897.

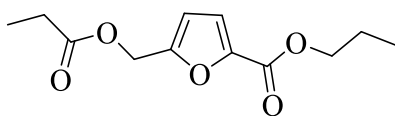

**2b**

Propyl 5-(((4-oxopentanoyl)oxy)methyl)furan-2-carboxylate (**2c**): Yellow liquid (0.231 g, 87%), <sup>1</sup>H-NMR (CDCl<sub>3</sub>, 400 MHz) δ (ppm): 7.10 (d, 1H, *J* = 3.6 Hz), 6.47 (d, 1H, *J* = 3.6 Hz), 5.08 (s, 2H), 4.24 (t, 2H, *J* = 6.8 Hz), 2.74 (t, 2H, *J* = 6.8 Hz), 2.59 (t, 2H, *J* = 6.8 Hz), 2.16 (s, 3H), 1.79-1.70 (m, 2H), 0.97 (t, 3H, *J* = 7.2 Hz). <sup>13</sup>C-NMR (CDCl<sub>3</sub>, 100 MHz) δ (ppm): 206.5, 172.3, 158.8, 153.4, 145.1, 118.5, 112.2, 66.7, 58.2, 37.9, 29.9, 27.7, 22.1, 10.4. FTIR (cm<sup>-1</sup>): 2956, 2919, 2871, 2852, 1722, 1599, 1461, 1398, 1377, 1210, 1151, 1083, 817. HRMS (ESI) calculated for C<sub>14</sub>H<sub>18</sub>O<sub>6</sub> [M+Na]<sup>+</sup> 305.0996, found 305.1069.

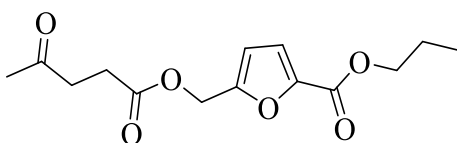

**2c**

Propyl 5-((benzoyloxy)methyl)furan-2-carboxylate (**2d**): Yellow liquid (0.266 g, 84%), <sup>1</sup>H-NMR (CDCl<sub>3</sub>, 400 MHz) δ (ppm): 8.04 (dd, 2H, *J*<sub>1</sub> = 8.0 Hz, *J*<sub>2</sub> = 1.2 Hz), 7.57-7.53 (m, 1H), 7.42 (t, 2H, *J* = 7.7 Hz), 7.14 (d, 2H, *J* = 3.6 Hz), 6.58 (d, 2H, *J* = 3.6 Hz), 5.34 (s, 2H), 4.26 (t, 2H, *J* = 6.8 Hz), 1.80-1.71 (m, 2H), 0.99 (t, 3H, *J* = 7.2 Hz). <sup>13</sup>C-NMR (CDCl<sub>3</sub>, 100 MHz) δ (ppm): 166.1, 158.8, 153.6, 145.2, 133.4, 129.9, 129.6, 128.5, 118.6, 112.5, 66.7, 58.4, 22.2, 10.5. FTIR (cm<sup>-1</sup>): 2969, 2880, 1715, 1536, 1451, 1366, 1295, 1135, 1090, 1068, 760. HRMS (ESI) calculated for C<sub>16</sub>H<sub>16</sub>O<sub>5</sub> [M+Na]<sup>+</sup> 311.0890, found 311.0899.

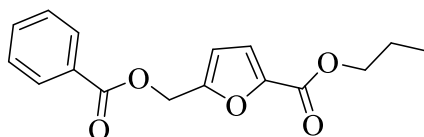

**2d**

Butyl 5-(chloromethyl)furan-2-carboxylate (**3**): Light yellow liquid (3.401 g, 85%), <sup>1</sup>H-NMR (CDCl<sub>3</sub>, 400 MHz) δ (ppm): 7.26 (d, 1H, *J* = 3.6 Hz), 6.64 (d, 1H, *J* = 3.6 Hz), 4.76 (s, 2H), 4.46 (t, 2H, *J* = 6.8 Hz), 1.92-1.84 (m, 2H), 1.65-1.55 (m, 2H), 1.12 (t, 3H, *J* = 7.2 Hz). <sup>13</sup>C-NMR (CDCl<sub>3</sub>, 100 MHz) δ (ppm): 158.6, 154.2, 145.2, 118.6, 111.4, 65.1, 36.8, 30.8, 19.2, 13.8. FTIR (cm<sup>-1</sup>): 2960, 2930, 2873, 1717, 1521, 1464, 1296, 1210, 1158, 1060, 1018, 760. HRMS (ESI) calculated for C<sub>10</sub>H<sub>13</sub>ClO<sub>3</sub> [M+H]<sup>+</sup> 217.0626, found 217.0637.

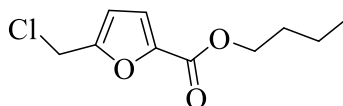

**3**

Butyl 5-(acetoxymethyl)furan-2-carboxylate (**3a**): Yellow liquid (0.252 g, 84%), <sup>1</sup>H-NMR (CDCl<sub>3</sub>, 400 MHz) δ (ppm): 7.10 (d, 1H, *J* = 3.6 Hz), 6.48 (d, 1H, *J* = 3.6 Hz), 5.07 (s, 2H), 4.29 (t, 2H, *J* = 6.8 Hz), 2.08 (s, 3H), 1.75-1.68 (m, 2H), 1.48-1.38 (m, 2H), 0.95 (t, 3H, *J* =

7.2 Hz).  $^{13}\text{C}$ -NMR ( $\text{CDCl}_3$ , 100 MHz)  $\delta$  (ppm): 170.5, 158.8, 153.5, 145.2, 118.5, 112.3, 65.1, 58.0, 30.8, 20.9, 19.2, 13.8. FTIR ( $\text{cm}^{-1}$ ): 2960, 2937, 2875, 1744, 1716, 1599, 1536, 1464, 1295, 1223, 1207, 1020, 762. HRMS (ESI) calculated for  $\text{C}_{12}\text{H}_{16}\text{O}_5$   $[\text{M}+\text{Na}]^+$  263.0890, found 263.0893.

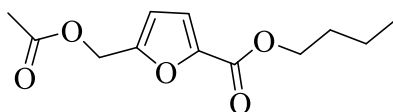

**3a**

Butyl 5-((propionyloxy)methyl)furan-2-carboxylate (**3b**): Yellow liquid (0.182 g, 79%),  $^1\text{H}$ -NMR ( $\text{CDCl}_3$ , 400 MHz)  $\delta$  (ppm): 7.10 (d, 1H,  $J = 3.6$  Hz), 6.47 (d, 1H,  $J = 3.6$  Hz), 5.08 (s, 2H), 4.29 (t, 2H,  $J = 6.8$  Hz), 2.35 (q, 2H,  $J = 7.6$  Hz), 1.74-1.67 (m, 2H), 1.47-1.38 (m, 2H), 1.13 (t, 3H,  $J = 7.6$  Hz), 0.95 (t, 3H,  $J = 7.2$  Hz).  $^{13}\text{C}$ -NMR ( $\text{CDCl}_3$ , 100 MHz)  $\delta$  (ppm): 174.0, 158.8, 153.6, 145.1, 118.5, 112.1, 65.0, 57.9, 30.8, 27.4, 19.2, 13.8, 9.0. FTIR ( $\text{cm}^{-1}$ ): 2961, 2937, 2875, 1729, 1719, 1536, 1462, 1295, 1135, 1081, 1017, 762. HRMS (ESI) calculated for  $\text{C}_{13}\text{H}_{18}\text{O}_5$   $[\text{M}+\text{Na}]^+$  277.1046, found 277.1057.

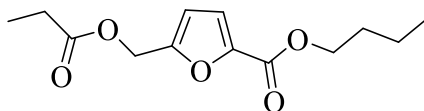

**3b**

Butyl 5-(((4-oxopentanoyl)oxy)methyl)furan-2-carboxylate (**3c**): Yellow liquid (0.240 g, 87%),  $^1\text{H}$ -NMR ( $\text{CDCl}_3$ , 400 MHz)  $\delta$  (ppm): 7.09 (d, 1H,  $J = 3.6$  Hz), 6.48 (d, 1H,  $J = 3.6$  Hz), 5.08 (s, 2H), 4.29 (t, 2H,  $J = 6.8$  Hz), 2.75 (t, 2H,  $J = 6.8$  Hz), 2.60 (t, 2H,  $J = 6.8$  Hz), 2.17 (s, 3H), 1.74-1.67 (m, 2H), 1.47-1.38 (m, 2H), 0.95 (t, 3H,  $J = 7.2$  Hz).  $^{13}\text{C}$ -NMR ( $\text{CDCl}_3$ , 100 MHz)  $\delta$  (ppm): 206.5, 172.3, 158.8, 153.4, 145.1, 118.5, 112.2, 65.1, 58.2, 37.9, 30.9, 29.9, 27.9, 19.2, 13.8. FTIR ( $\text{cm}^{-1}$ ): 2961, 2937, 2875, 1714, 1524, 1295, 1207, 1136, 1020, 762. HRMS (ESI) calculated for  $\text{C}_{15}\text{H}_{20}\text{O}_6$   $[\text{M}+\text{Na}]^+$  319.1152, found 319.1158.

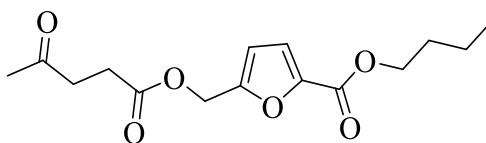

**3c**

Butyl 5-((benzoyloxy)methyl)furan-2-carboxylate (**3d**): Yellow liquid (0.0.242 g, 83%),  $^1\text{H}$ -NMR ( $\text{CDCl}_3$ , 400 MHz)  $\delta$  (ppm): 8.05 (dd, 2H,  $J_1 = 8.0$  Hz,  $J_2 = 1.6$  Hz), 7.58-7.54 (m, 1H), 7.43 (t, 2H,  $J = 7.6$  Hz), 7.14 (d, 2H,  $J = 3.6$  Hz), 6.58 (d, 2H,  $J = 3.6$  Hz), 5.35 (s, 2H), 4.31 (t, 2H,  $J = 6.4$  Hz), 1.76-1.69 (m, 2H), 1.49-1.39 (m, 2H), 0.96 (t, 3H,  $J = 7.2$  Hz).  $^{13}\text{C}$ -NMR ( $\text{CDCl}_3$ , 100 MHz)  $\delta$  (ppm): 166.2, 158.9, 153.6, 145.2, 133.4, 130.0, 129.6, 128.5, 118.6, 112.5, 65.1, 58.5, 30.9, 19.3, 13.8. FTIR ( $\text{cm}^{-1}$ ): 2957, 2921, 2872, 1718, 1461, 1267, 1143, 1098, 1024, 711. HRMS (ESI) calculated for  $\text{C}_{17}\text{H}_{18}\text{O}_5$   $[\text{M}+\text{Na}]^+$  325.1046, found 325.1053.

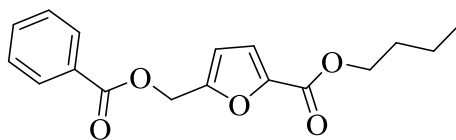

**3d**

pentyl 5-(chloromethyl)furan-2-carboxylate (**4**): Light yellow liquid (2.167 g, 85%), <sup>1</sup>H-NMR (CDCl<sub>3</sub>, 800 MHz) δ (ppm): 7.26 (d, 1H, *J* = 3.2 Hz), 6.63 (d, 1H, *J* = 3.2 Hz), 4.75 (s, 2H), 4.45 (t, 2H, *J* = 7.2 Hz), 1.91-1.88 (m, 2H), 155-1.51 (m, 4H), 1.07 (t, 3H, *J* = 7.2 Hz). <sup>13</sup>C-NMR (CDCl<sub>3</sub>, 200 MHz) δ (ppm): 158.7, 154.2, 145.3, 118.7, 111.5, 65.4, 36.8, 28.5, 28.1, 22.4, 14.1. FTIR (cm<sup>-1</sup>): 2957, 2932, 2867, 1722, 1528, 1463, 1298, 1157, 1123, 1018, 762. HRMS (ESI) calculated for C<sub>11</sub>H<sub>15</sub>ClO<sub>3</sub> [M+Na]<sup>+</sup> 253.0602, found 253.0638.

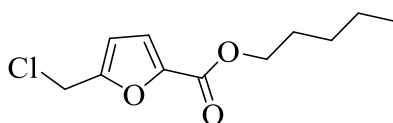

**4**

Pentyl 5-(acetoxymethyl)furan-2-carboxylate (**4a**): Yellow liquid (0.296 g, 84%), <sup>1</sup>H-NMR (CDCl<sub>3</sub>, 300 MHz) δ (ppm): 7.27 (d, 1H, *J* = 3.6 Hz), 6.65 (d, 1H, *J* = 3.6 Hz), 5.24 (s, 2H), 4.44 (t, 2H, *J* = 6.9 Hz), 2.24 (s, 3H), 1.93-1.85 (m, 2H), 1.56-1.50 (m, 4H), 1.07 (t, 3H, *J* = 6.9 Hz). <sup>13</sup>C-NMR (CDCl<sub>3</sub>, 75 MHz) δ (ppm): 170.5, 158.8, 153.5, 145.2, 118.5, 112.3, 65.4, 58.0, 28.5, 28.1, 22.4, 20.9, 14.1. FTIR (cm<sup>-1</sup>): 2958, 2934, 2871, 1744, 1718, 1535, 1376, 1296, 1208, 1136, 1021, 762. HRMS (ESI) calculated for C<sub>13</sub>H<sub>18</sub>O<sub>5</sub> [M+K]<sup>+</sup> 293.0786, found 293.0789.

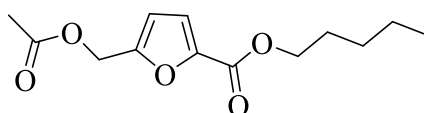

**4a**

Pentyl 5-((propionyloxy)methyl)furan-2-carboxylate (**4b**): Yellow liquid (0.212 g, 80%), <sup>1</sup>H-NMR (CDCl<sub>3</sub>, 400 MHz) δ (ppm): 7.26 (d, 1H, *J* = 3.6 Hz), 6.63 (d, 1H, *J* = 3.6 Hz), 5.23 (s, 2H), 4.43 (t, 2H, *J* = 6.8 Hz), 2.51 (q, 2H, *J* = 7.6 Hz), 1.90-1.84 (m, 2H), 1.56-1.50 (m, 4H), 1.28 (t, 3H, *J* = 7.6 Hz), 1.05 (t, 3H, *J* = 6.8 Hz). <sup>13</sup>C-NMR (CDCl<sub>3</sub>, 100 MHz) δ (ppm): 174.1, 158.8, 153.6, 145.1, 118.5, 112.2, 65.4, 57.9, 28.5, 28.1, 27.4, 22.4, 14.1, 9.1. FTIR (cm<sup>-1</sup>): 2958, 2934, 2869, 1733, 1532, 1462, 1297, 1209, 1139, 962, 763. HRMS (ESI) calculated for C<sub>14</sub>H<sub>20</sub>O<sub>5</sub> [M+H]<sup>+</sup> 269.1384, found 269.1389.

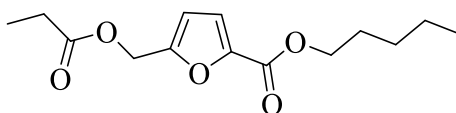

**4b**

Pentyl 5-(((4-oxopentanoyl)oxy)methyl)furan-2-carboxylate(**4c**): Yellow liquid (0.245 g, 88%), <sup>1</sup>H-NMR (CDCl<sub>3</sub>, 400 MHz) δ (ppm): 7.11 (d, 1H, *J* = 3.6 Hz), 6.49 (d, 1H, *J* = 3.6 Hz), 5.10 (s, 2H), 4.29 (t, 2H, *J* = 6.8 Hz), 2.76 (t, 2H, *J* = 6.4 Hz), 2.61 (t, 2H, *J* = 6.4 Hz), 2.18 (s, 3H), 1.77-1.71 (m, 2H), 1.40-1.36 (m, 4H), 0.92 (t, 3H, *J* = 7.2 Hz). <sup>13</sup>C-NMR (CDCl<sub>3</sub>, 100

MHz)  $\delta$  (ppm): 206.5, 172.3, 158.8, 153.4, 145.1, 118.6, 112.3, 65.4, 58.3, 37.9, 30.0, 28.5, 28.1, 27.9, 22.4, 14.1. FTIR ( $\text{cm}^{-1}$ ): 2958, 2928, 2859, 1717, 1533, 1297, 1208, 1141, 1021, 763. HRMS (ESI) calculated for  $\text{C}_{16}\text{H}_{22}\text{O}_6$   $[\text{M}+\text{Na}]^+$  333.1309, found 333.1315.

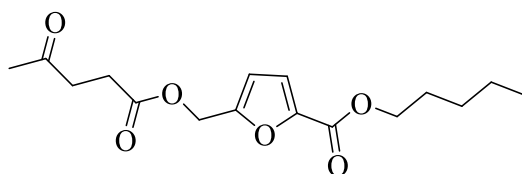

**4c**

pentyl 5-((benzoyloxy)methyl)furan-2-carboxylate(**4d**): Yellow liquid (0.233 g, 84%),  $^1\text{H}$ -NMR ( $\text{CDCl}_3$ , 400 MHz)  $\delta$  (ppm): 8.05 (dd, 2H,  $J_1 = 8.4$  Hz,  $J_2 = 1.2$  Hz), 7.58-7.54 (m, 1H), 7.43 (t, 2H,  $J = 8.0$  Hz), 7.14 (d, 1H,  $J = 3.6$  Hz), 6.58 (d, 1H,  $J = 3.6$  Hz), 5.35 (s, 2H), 4.30 (t, 2H,  $J = 6.8$  Hz), 1.78-1.71 (m, 2H), 1.40-1.36 (m, 4H), 0.91 (t, 3H,  $J = 7.2$  Hz).  $^{13}\text{C}$ -NMR ( $\text{CDCl}_3$ , 100 MHz)  $\delta$  (ppm): 166.1, 158.8, 153.6, 145.2, 133.4, 129.9, 129.6, 128.5, 118.6, 112.5, 65.4, 58.4, 28.5, 28.1, 22.4, 14.1. FTIR ( $\text{cm}^{-1}$ ): 2959, 2927, 2865, 1726, 1458, 1300, 1267, 1142, 1101, 1069, 762. HRMS (ESI) calculated for  $\text{C}_{18}\text{H}_{20}\text{O}_5$   $[\text{M}+\text{Na}]^+$  339.1203, found 339.1208.

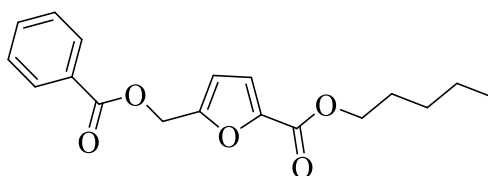

**4d**

Hexyl 5-(chloromethyl)furan-2-carboxylate (**5**): Light yellow liquid (2.620 g, 86%),  $^1\text{H}$ -NMR ( $\text{CDCl}_3$ , 400 MHz)  $\delta$  (ppm): 7.10 (d, 1H,  $J = 3.6$  Hz), 6.48 (d, 1H,  $J = 3.6$  Hz), 4.59 (s, 2H), 4.30 (t, 2H,  $J = 6.8$  Hz), 1.77-1.70 (m, 2H), 1.42-1.25 (m, 6H), 0.89 (t, 3H,  $J = 7.2$  Hz).  $^{13}\text{C}$ -NMR ( $\text{CDCl}_3$ , 100 MHz)  $\delta$  (ppm): 158.7, 154.2, 145.3, 118.7, 115.5, 65.5, 36.9, 31.5, 28.8, 25.7, 22.7, 14.1. FTIR ( $\text{cm}^{-1}$ ): 2957, 2930, 2860, 1723, 1529, 1299, 1212, 1160, 1019, 762. HRMS (ESI) calculated for  $\text{C}_{12}\text{H}_{17}\text{ClO}_3$   $[\text{M}+\text{H}]^+$  245.0939, found 245.0937.

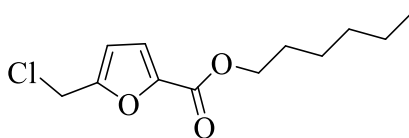

**5**

Hexyl 5-(acetoxymethyl)furan-2-carboxylate (**5a**): Yellow liquid (0.308 g, 85%),  $^1\text{H}$ -NMR ( $\text{CDCl}_3$ , 300 MHz)  $\delta$  (ppm): 7.26 (d, 1H,  $J = 3.3$  Hz), 6.65 (d, 1H,  $J = 3.3$  Hz), 5.24 (s, 2H), 4.44 (t, 3H,  $J = 6.9$  Hz), 2.24 (s, 3H), 1.93-1.84 (m, 2H), 1.58-1.44 (m, 6H), 1.04 (t, 3H,  $J = 7.2$  Hz).  $^{13}\text{C}$ -NMR ( $\text{CDCl}_3$ , 75 MHz)  $\delta$  (ppm): 170.5, 158.8, 153.5, 145.2, 118.5, 112.3, 65.4, 58.0, 31.5, 28.7, 25.6, 22.6, 20.9, 14.1. FTIR ( $\text{cm}^{-1}$ ): 2957, 2931, 2860, 1745, 1718, 1598, 1375, 1296, 1208, 1021, 812, 762. HRMS (ESI) calculated for  $\text{C}_{14}\text{H}_{20}\text{O}_5$   $[\text{M}+\text{K}]^+$  307.0942, found 307.0952.



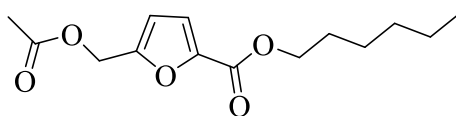

**5a**

Hexyl 5-((propionyloxy)methyl)furan-2-carboxylate (**5b**): Yellow liquid (0.185 g, 78%),  $^1\text{H-NMR}$  ( $\text{CDCl}_3$ , 400 MHz)  $\delta$  (ppm): 7.11 (d, 1H,  $J = 3.6$  Hz), 6.48 (d, 1H,  $J = 3.6$  Hz), 5.09 (s, 2H), 4.29 (t, 2H,  $J = 6.8$  Hz), 2.36 (q, 2H,  $J = 7.6$  Hz), 1.76-1.69 (m, 2H), 1.42-1.25 (m, 6H), 1.14 (t, 3H,  $J = 7.6$  Hz), 0.89 (t, 3H,  $J = 6.8$  Hz).  $^{13}\text{C-NMR}$  ( $\text{CDCl}_3$ , 100 MHz)  $\delta$  (ppm): 174.0, 158.8, 153.7, 145.1, 118.5, 112.2, 65.4, 57.9, 31.5, 28.8, 27.5, 25.7, 22.6, 14.1, 9.1. FTIR ( $\text{cm}^{-1}$ ): 2956, 2928, 2857, 1732, 1719, 1462, 1296, 1208, 1138, 1018, 762. HRMS (ESI) calculated for  $\text{C}_{15}\text{H}_{22}\text{O}_5$   $[\text{M}+\text{Na}]^+$  305.1359, found 305.1363.

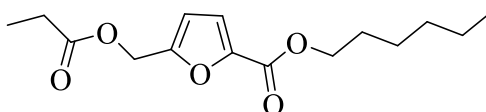

**5b**

Hexyl 5-(((4-oxopentanoyl)oxy)methyl)furan-2-carboxylate (**5c**): Yellow liquid (0.239 g, 89%),  $^1\text{H-NMR}$  ( $\text{CDCl}_3$ , 300 MHz)  $\delta$  (ppm): 7.27 (d, 1H,  $J = 3.6$  Hz), 6.65 (d, 1H,  $J = 3.6$  Hz), 5.25 (s, 2H), 4.44 (t, 2H,  $J = 6.8$  Hz), 2.92 (t, 2H,  $J = 6.2$  Hz), 2.76 (t, 2H,  $J = 6.2$  Hz), 2.34 (s, 3H), 1.93-1.84 (m, 2H), 1.58-1.45 (m, 6H), 1.05 (t, 3H,  $J = 6.9$  Hz).  $^{13}\text{C-NMR}$  ( $\text{CDCl}_3$ , 75 MHz)  $\delta$  (ppm): 206.5, 172.3, 158.8, 153.4, 145.1, 118.5, 112.2, 65.3, 58.2, 37.9, 31.5, 29.9, 28.7, 27.9, 25.6, 22.6, 14.1. FTIR ( $\text{cm}^{-1}$ ): 2957, 2930, 2860, 1715, 1536, 1296, 1208, 1139, 992, 763. HRMS (ESI) calculated for  $\text{C}_{17}\text{H}_{24}\text{O}_6$   $[\text{M}+\text{H}]^+$  325.1646, found 325.1647.

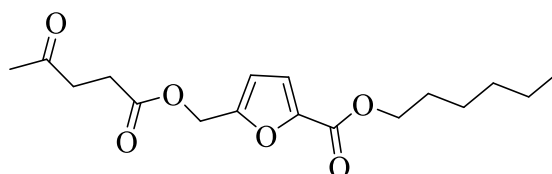

**5c**

Hexyl 5-((benzyloxy)methyl)furan-2-carboxylate (**5d**): Yellow liquid (0.254 g, 85%),  $^1\text{H-NMR}$  ( $\text{CDCl}_3$ , 300 MHz)  $\delta$  (ppm): 8.05 (dd, 2H,  $J_1 = 8.4$  Hz,  $J_2 = 1.2$  Hz), 7.59-7.53 (m, 1H), 7.43 (t, 2H,  $J = 7.4$  Hz), 7.14 (d, 1H,  $J = 3.4$  Hz), 6.58 (d, 1H,  $J = 3.4$  Hz), 5.35 (s, 2H), 4.30 (t, 2H,  $J = 6.8$  Hz), 1.78-1.69 (m, 2H), 1.45-1.29 (m, 6H), 0.89 (t, 3H,  $J = 6.9$  Hz).  $^{13}\text{C-NMR}$  ( $\text{CDCl}_3$ , 75 MHz)  $\delta$  (ppm): 166.2, 158.8, 153.6, 145.2, 133.4, 129.9, 129.6, 128.5, 118.6, 112.5, 65.4, 58.4, 31.5, 28.8, 25.7, 22.6, 14.1. FTIR ( $\text{cm}^{-1}$ ): 2957, 2931, 2859, 1718, 1466, 1296, 1263, 1138, 1093, 1068, 762. HRMS (ESI) calculated for  $\text{C}_{19}\text{H}_{22}\text{O}_5$   $[\text{M}+\text{NH}_4]^+$  348.1805, found 348.1839.

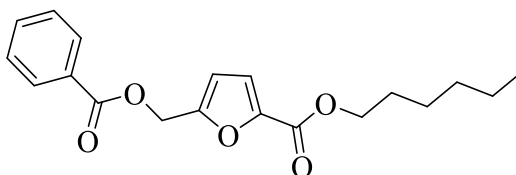

**5d**

Heptyl 5-(chloromethyl)furan-2-carboxylate (**6**): Light yellow liquid (2.396 g, 89%), <sup>1</sup>H-NMR (CDCl<sub>3</sub>, 800 MHz) δ (ppm): 7.26 (d, 1H, *J* = 3.2 Hz), 6.64 (d, 1H, *J* = 3.2 Hz), 4.75 (s, 2H), 4.45 (t, 2H, *J* = 7.2 Hz), 1.91-1.87 (m, 2H), 1.56-1.53 (m, 2H), 1.51-1.47 (m, 2H), 1.46-1.43 (m, 4H), 1.04 (t, 3H, *J* = 7.2 Hz). <sup>13</sup>C-NMR (CDCl<sub>3</sub>, 200 MHz) δ (ppm): 158.6, 154.1, 145.2, 118.6, 111.4, 65.4, 36.8, 31.8, 29.0, 28.7, 25.9, 22.6, 14.1. FTIR (cm<sup>-1</sup>): 2553, 2927, 2859, 1730, 1462, 1298, 1159, 1224, 762. HRMS (ESI) calculated for C<sub>13</sub>H<sub>19</sub>ClO<sub>3</sub> [M+K]<sup>+</sup> 297.0654, found 297.0665.

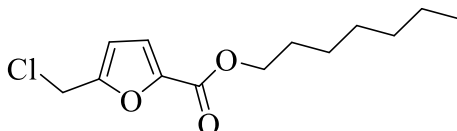

**6**

Heptyl 5-(acetoxymethyl)furan-2-carboxylate (**6a**): Yellow liquid (0.284 g, 86%), <sup>1</sup>H-NMR (CDCl<sub>3</sub>, 400 MHz) δ (ppm): 7.11 (d, 1H, *J* = 3.6 Hz), 6.49 (d, 1H, *J* = 3.6 Hz), 5.08 (s, 2H), 4.29 (t, 2H, *J* = 6.8 Hz), 2.09 (s, 3H), 1.77-1.70 (m, 2H), 1.42-1.29 (m, 8H), 0.88 (t, 3H, *J* = 6.8 Hz). <sup>13</sup>C-NMR (CDCl<sub>3</sub>, 100 MHz) δ (ppm): 170.6, 158.8, 153.5, 145.2, 118.5, 112.3, 65.4, 58.0, 31.8, 29.0, 28.8, 26.0, 22.7, 20.9, 14.2. FTIR (cm<sup>-1</sup>): 2956, 2928, 2857, 1745, 1719, 1295, 1208, 1020, 762. HRMS (ESI) calculated for C<sub>15</sub>H<sub>22</sub>O<sub>5</sub> [M+K]<sup>+</sup> 321.1099, found 321.1113.

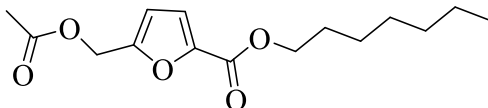

**6a**

Heptyl 5-((propionyloxy)methyl)furan-2-carboxylate (**6b**): Yellow liquid (0.209 g, 80%), <sup>1</sup>H-NMR (CDCl<sub>3</sub>, 400 MHz) δ (ppm): 7.11 (d, 1H, *J* = 3.6 Hz), 6.49 (d, 1H, *J* = 3.6 Hz), 5.09 (s, 2H), 4.29 (t, 2H, *J* = 6.8 Hz), 2.37 (q, 2H, *J* = 7.6 Hz), 1.77-1.70 (m, 2H), 1.42-1.25 (m, 8H), 1.14 (t, 3H, *J* = 7.6 Hz), 0.88 (t, 3H, *J* = 6.8 Hz). <sup>13</sup>C-NMR (CDCl<sub>3</sub>, 100 MHz) δ (ppm): 174.1, 158.9, 153.6, 145.1, 118.5, 112.2, 65.4, 57.9, 31.5, 29.8, 28.7, 27.5, 25.7, 22.6, 14.1, 9.1. FTIR (cm<sup>-1</sup>): 2956, 2928, 2857, 1716, 1524, 1295, 1139, 950, 763. HRMS (ESI) calculated for C<sub>16</sub>H<sub>24</sub>O<sub>5</sub> [M+Na]<sup>+</sup> 319.1516, found 319.1523.

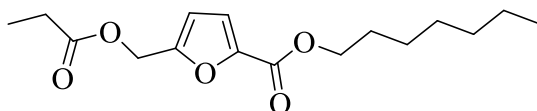

**6b**

Heptyl 5-(((4-oxopentanoyl)oxy)methyl)furan-2-carboxylate (**6c**): Yellow liquid (0.220 g, 89%), <sup>1</sup>H-NMR (CDCl<sub>3</sub>, 400 MHz) δ (ppm): 7.11 (d, 1H, *J* = 3.4 Hz), 6.49 (d, 1H, *J* = 3.4 Hz), 5.09 (s, 2H), 4.28 (t, 2H, *J* = 6.8 Hz), 2.76 (t, 2H, *J* = 6.8 Hz), 2.61 (d, 2H, *J* = 6.8 Hz), 2.18 (s, 3H), 1.74-1.69 (m, 2H), 1.41-1.24 (m, 8H), 0.88 (t, 3H, *J* = 6.8 Hz). <sup>13</sup>C-NMR (CDCl<sub>3</sub>, 100 MHz) δ (ppm): 206.6, 172.4, 158.8, 153.4, 145.1, 118.6, 112.3, 65.4, 58.2, 37.9, 31.8, 30.0, 29.0, 28.8, 27.9, 26.0, 22.7, 14.2. FTIR (cm<sup>-1</sup>): 2958, 2928, 2858, 1718, 1537, 1353, 1261, 1141, 950, 762. HRMS (ESI) calculated for C<sub>18</sub>H<sub>26</sub>O<sub>6</sub> [M+Na]<sup>+</sup> 361.1622, found 361.1622.

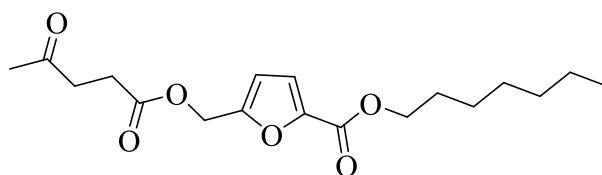

**6c**

Heptyl 5-((benzyloxy)methyl)furan-2-carboxylate (**6d**): Yellow liquid (0.201 g, 83%), <sup>1</sup>H-NMR (CDCl<sub>3</sub>, 400 MHz) δ (ppm): 8.04 (dd, 2H, *J*<sub>1</sub> = 8.4 Hz, *J*<sub>2</sub> = 1.2 Hz), 7.58-7.54 (m, 1H), 7.43 (t, 2H, *J* = 6.9 Hz), 7.14 (d, 1H, *J* = 3.4 Hz), 6.59 (d, 1H, *J* = 3.4 Hz), 5.34 (s, 2H), 4.29 (t, 2H, *J* = 6.8 Hz), 1.77-1.70 (m, 2H), 1.41-1.24 (m, 8H), 0.87 (t, 3H, *J* = 6.8 Hz). <sup>13</sup>C-NMR (CDCl<sub>3</sub>, 100 MHz) δ (ppm): 166.2, 158.9, 153.6, 145.2, 133.4, 129.9, 129.6, 128.5, 118.6, 112.5, 65.4, 58.4, 31.8, 29.0, 28.8, 26.0, 22.7, 14.2. FTIR (cm<sup>-1</sup>): 2955, 2928, 2857, 1720, 1452, 1296, 1264, 1209, 1064, 762. HRMS (ESI) calculated for C<sub>20</sub>H<sub>24</sub>O<sub>5</sub> [M+H]<sup>+</sup> 345.1697, found 345.1698.

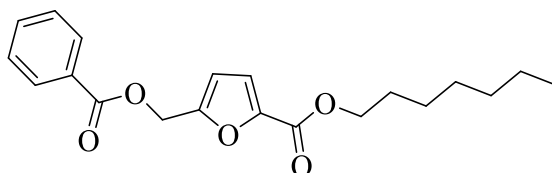

**6d**

Octyl 5-(chloromethyl)furan-2-carboxylate (**7**): Light yellow liquid (2.802 g, 89%), <sup>1</sup>H-NMR (CDCl<sub>3</sub>, 400 MHz) δ (ppm): 7.10 (d, 1H, *J* = 3.6 Hz), 6.48 (d, 1H, *J* = 3.6 Hz), 4.59 (s, 2H), 4.29 (t, 2H, *J* = 6.8 Hz), 1.77-1.69 (m, 2H), 1.43-1.25 (m, 10H), 0.87 (t, 3H, *J* = 6.8 Hz). <sup>13</sup>C-NMR (CDCl<sub>3</sub>, 100 MHz) δ (ppm): 158.7, 154.2, 145.2, 118.6, 111.5, 65.4, 36.8, 31.9, 29.3, 29.3, 28.8, 26.0, 22.8, 14.2. FTIR (cm<sup>-1</sup>): 2955, 2925, 2855, 1720, 1466, 1267, 1159, 1055, 762. HRMS (ESI) calculated for C<sub>16</sub>H<sub>21</sub>ClO<sub>3</sub> [M+H]<sup>+</sup> 273.1252, found 273.1253.

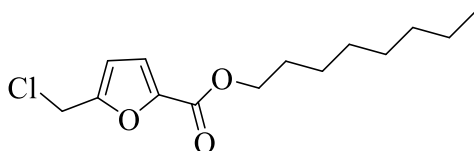

**7**

Octyl 5-(acetoxymethyl)furan-2-carboxylate (**7a**): Yellow liquid (0.243 g, 85%), <sup>1</sup>H-NMR (CDCl<sub>3</sub>, 400 MHz) δ (ppm): 7.11 (d, 1H, *J* = 3.4 Hz), 6.49 (d, 1H, *J* = 3.4 Hz), 5.08 (s, 2H), 4.29 (t, 2H, *J* = 6.8 Hz), 2.09 (s, 3H), 1.77-1.70 (m, 2H), 1.42-1.25 (m, 10H), 0.87 (t, 3H, *J* = 6.6 Hz). <sup>13</sup>C-NMR (CDCl<sub>3</sub>, 100 MHz) δ (ppm): 170.6, 158.8, 153.5, 145.2, 118.5, 112.3, 65.4, 58.0, 31.9, 29.3, 29.3, 28.8, 26.0, 22.8, 20.9, 14.2. FTIR (cm<sup>-1</sup>): 2955, 2926, 2857, 1743, 1726, 1297, 1212, 1140, 763. HRMS (ESI) calculated for C<sub>16</sub>H<sub>24</sub>O<sub>5</sub> [M+Na]<sup>+</sup> 319.1516, found 319.1517.

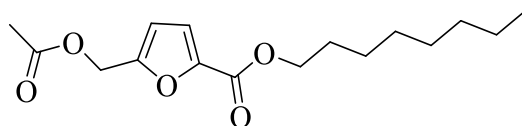

**7a**

Octyl 5-((propionyloxy)methyl)furan-2-carboxylate (**7b**): Yellow liquid (0.190 g, 81%),  $^1\text{H-NMR}$  ( $\text{CDCl}_3$ , 400 MHz)  $\delta$  (ppm): 7.11 (d, 1H,  $J = 3.6$  Hz), 6.49 (d, 1H,  $J = 3.6$  Hz), 5.09 (s, 2H), 4.28 (t, 2H,  $J = 6.8$  Hz), 2.36 (q, 2H,  $J = 7.6$  Hz), 1.76-1.68 (m, 2H), 1.41-1.24 (m, 10H), 1.14 (t, 3H,  $J = 7.6$  Hz), 0.87 (t, 3H,  $J = 6.6$  Hz).  $^{13}\text{C-NMR}$  ( $\text{CDCl}_3$ , 100 MHz)  $\delta$  (ppm): 174.1, 158.9, 153.6, 145.1, 118.6, 112.3, 65.4, 57.9, 31.9, 29.3, 29.3, 28.8, 27.5, 26.0, 22.8, 14.2, 9.1. FTIR ( $\text{cm}^{-1}$ ): 2954, 2927, 2857, 1734, 1463, 1296, 1139, 1018, 762. HRMS (ESI) calculated for  $\text{C}_{17}\text{H}_{26}\text{O}_5$   $[\text{M}+\text{Na}]^+$  333.1672, found 333.1675.

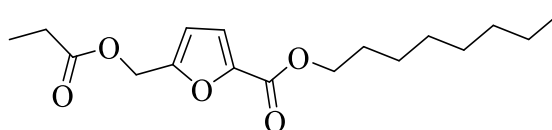

**7b**

Octyl 5-(((4-oxopentanoyl)oxy)methyl)furan-2-carboxylate (**7c**): Yellow liquid (0.278 g, 90%),  $^1\text{H-NMR}$  ( $\text{CDCl}_3$ , 400 MHz)  $\delta$  (ppm): 7.10 (d, 1H,  $J = 3.6$  Hz), 6.48 (d, 1H,  $J = 3.6$  Hz), 5.08 (s, 2H), 4.27 (t, 2H,  $J = 6.8$  Hz), 2.75 (t, 2H,  $J = 6.8$  Hz), 2.60 (t, 2H,  $J = 3.6$  Hz), 2.17 (s, 3H), 1.77-1.68 (m, 2H), 1.41-1.22 (m, 10H), 0.86 (t, 3H,  $J = 6.8$  Hz).  $^{13}\text{C-NMR}$  ( $\text{CDCl}_3$ , 100 MHz)  $\delta$  (ppm): 206.6, 172.3, 158.8, 153.4, 145.1, 118.6, 112.3, 65.4, 58.2, 37.9, 31.9, 29.9, 29.3, 29.3, 28.8, 27.9, 26.0, 22.7, 14.2. FTIR ( $\text{cm}^{-1}$ ): 2955, 2925, 2855, 1719, 1296, 1208, 1140, 1021, 762. HRMS (ESI) calculated for  $\text{C}_{19}\text{H}_{28}\text{O}_6$   $[\text{M}+\text{H}]^+$  353.1959, found 353.1956.

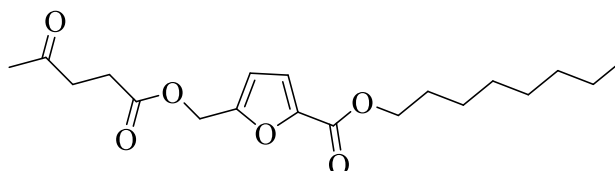

**7c**

Octyl 5-((benzyloxy)methyl)furan-2-carboxylate (**7d**): Yellow liquid (0.216 g, 84%),  $^1\text{H-NMR}$  ( $\text{CDCl}_3$ , 400 MHz)  $\delta$  (ppm): 8.04 (dd, 2H,  $J_1 = 8.4$  Hz,  $J_2 = 1.2$  Hz), 7.58-7.54 (m, 1H), 7.43 (t, 3H,  $J = 7.6$  Hz), 7.14 (d, 1H,  $J = 3.6$  Hz), 6.59 (d, 1H,  $J = 3.6$  Hz), 5.34 (s, 2H), 4.29 (t, 2H,  $J = 6.8$  Hz), 1.77-1.70 (m, 2H), 1.42-1.23 (m, 10H), 0.87 (t, 3H,  $J = 6.8$  Hz).  $^{13}\text{C-NMR}$  ( $\text{CDCl}_3$ , 100 MHz)  $\delta$  (ppm): 166.2, 158.9, 153.6, 145.2, 133.4, 129.9, 129.6, 128.5, 118.6, 112.5, 65.4, 58.4, 31.9, 29.3, 29.3, 28.8, 26.0, 22.8, 14.2. FTIR ( $\text{cm}^{-1}$ ): 2954, 2926, 2856, 1720, 1452, 1297, 1264, 1095, 1069, 710. HRMS (ESI) calculated for  $\text{C}_{21}\text{H}_{26}\text{O}_5$   $[\text{M}+\text{H}]^+$  359.1853, found 359.1858.

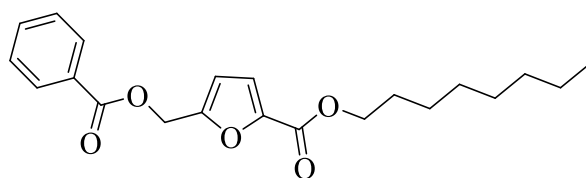

**7d**

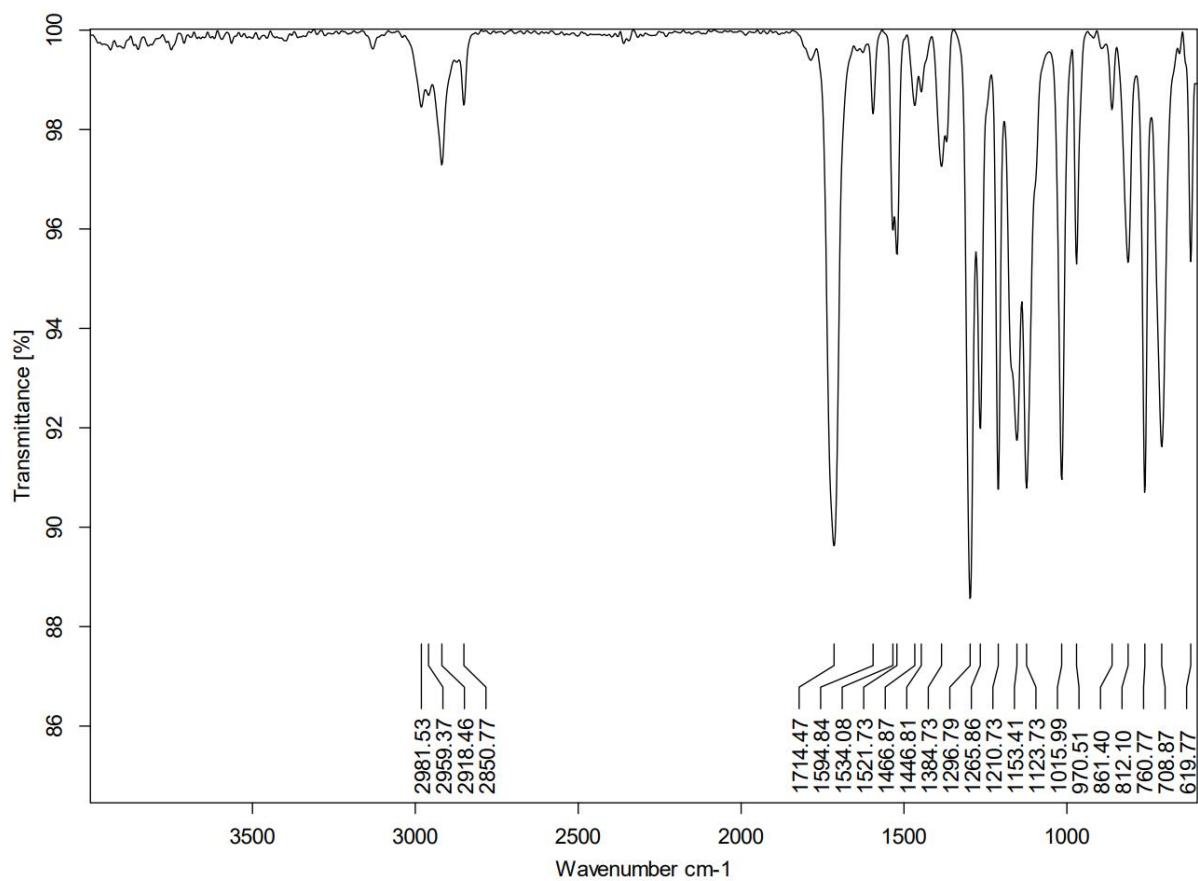

**Figure S1.** The FTIR spectrum of **1**.

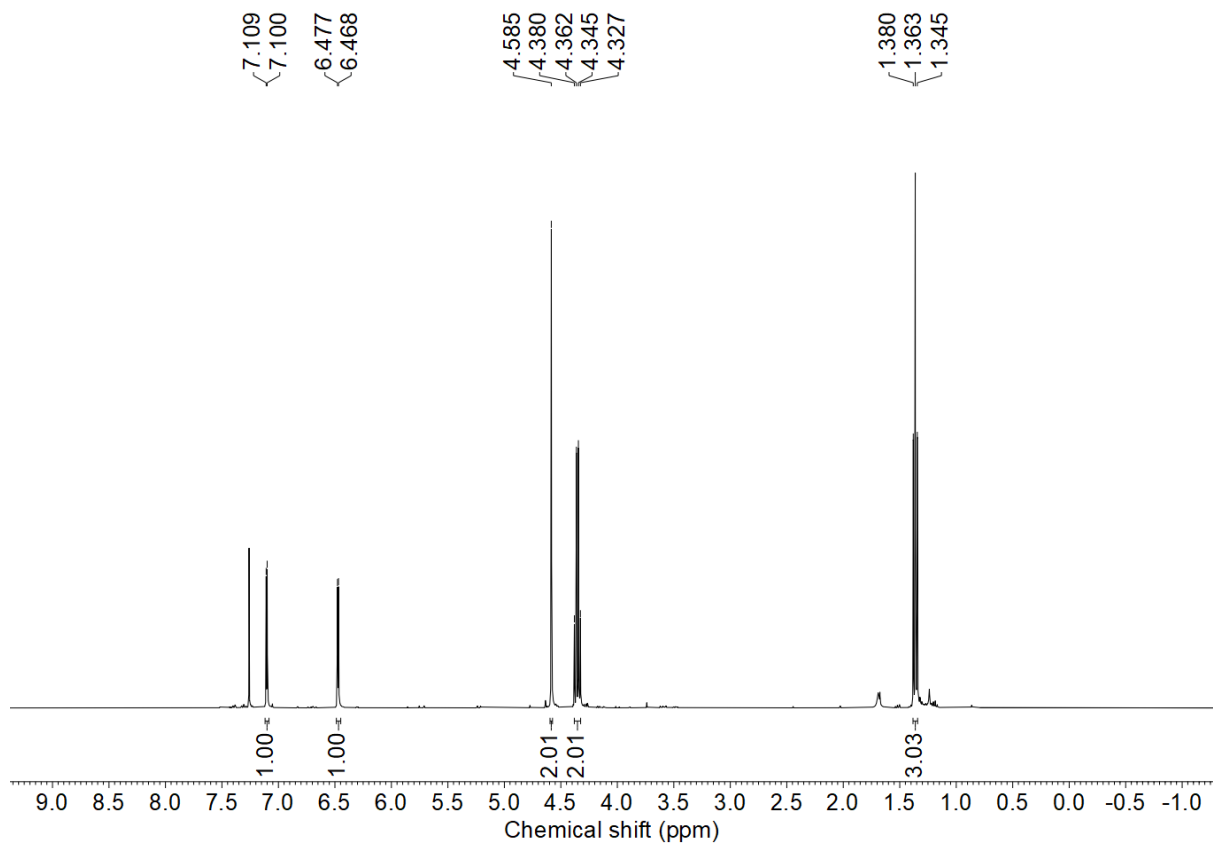

**Figure S2.** The <sup>1</sup>H-NMR spectrum of **1**.

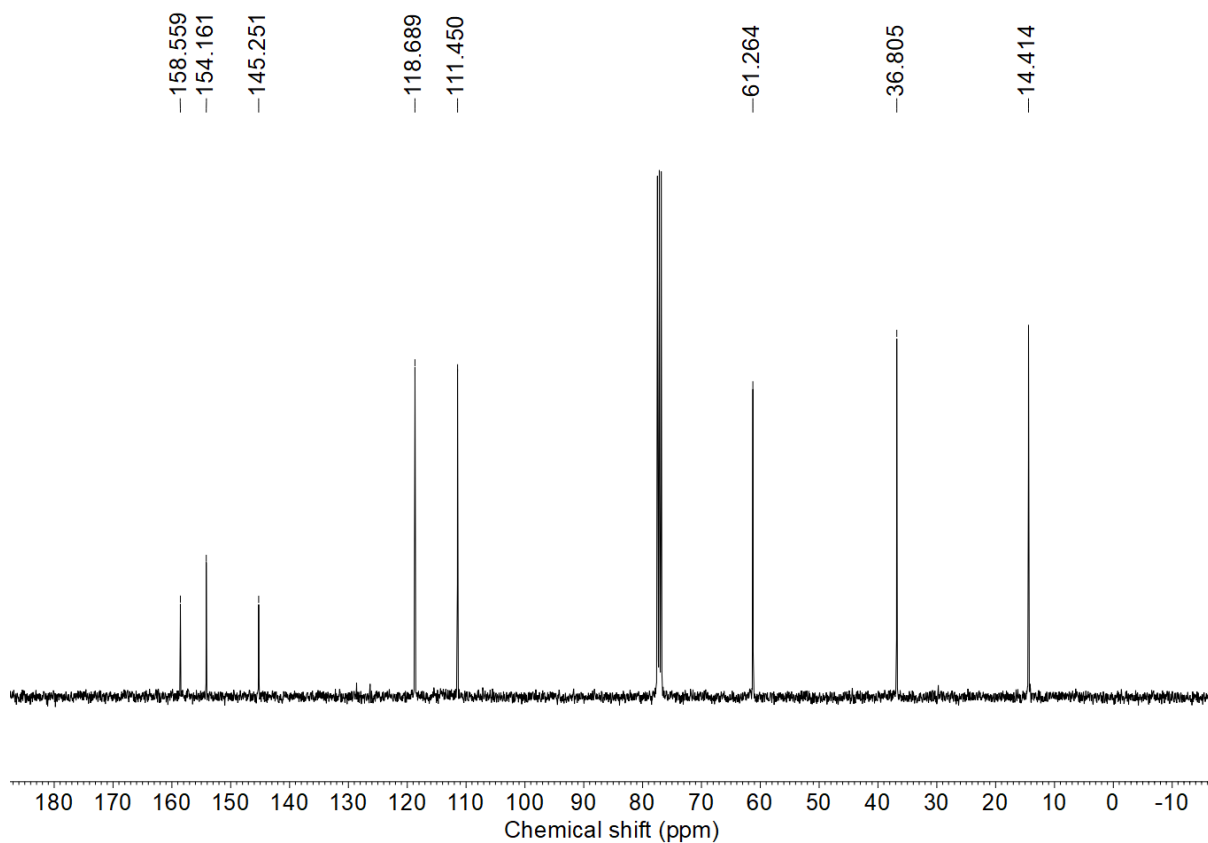

**Figure S3.** The  $^{13}\text{C}$ -NMR spectrum of **1**.

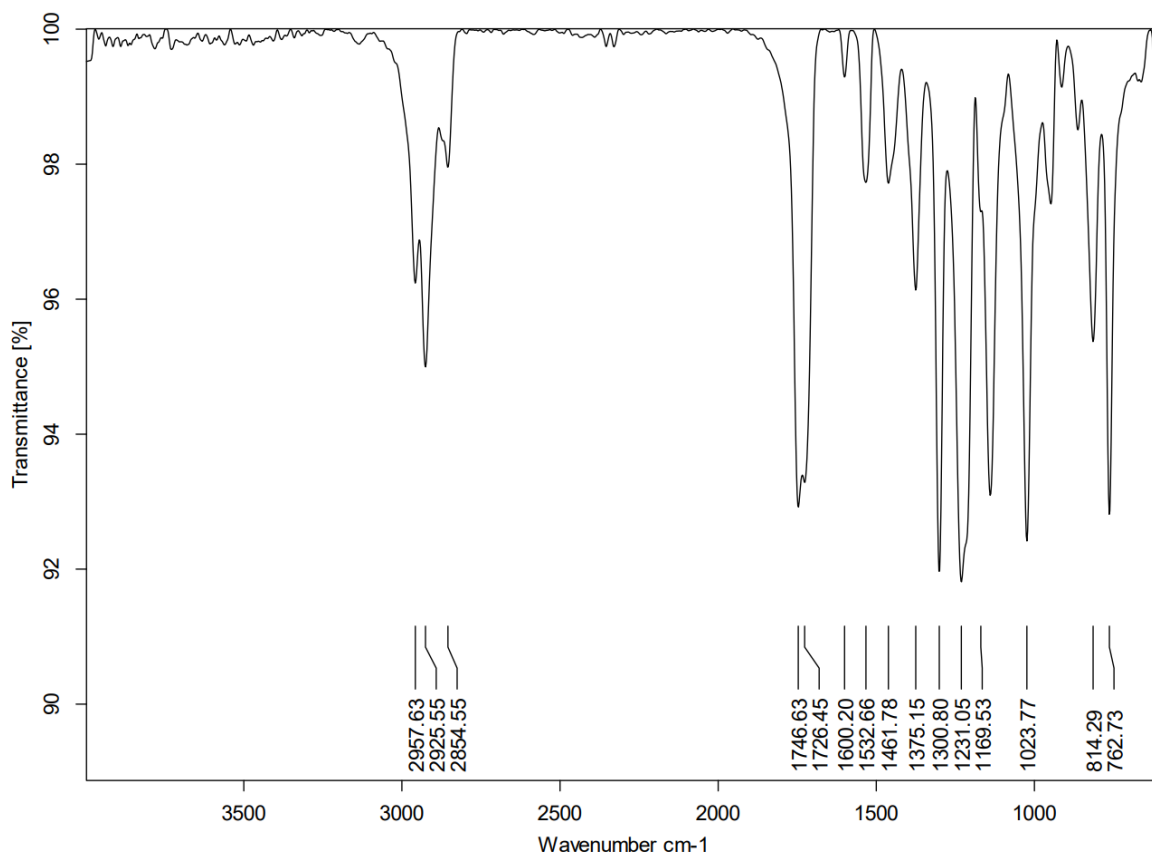

**Figure S4.** The FTIR spectrum of **1a**.

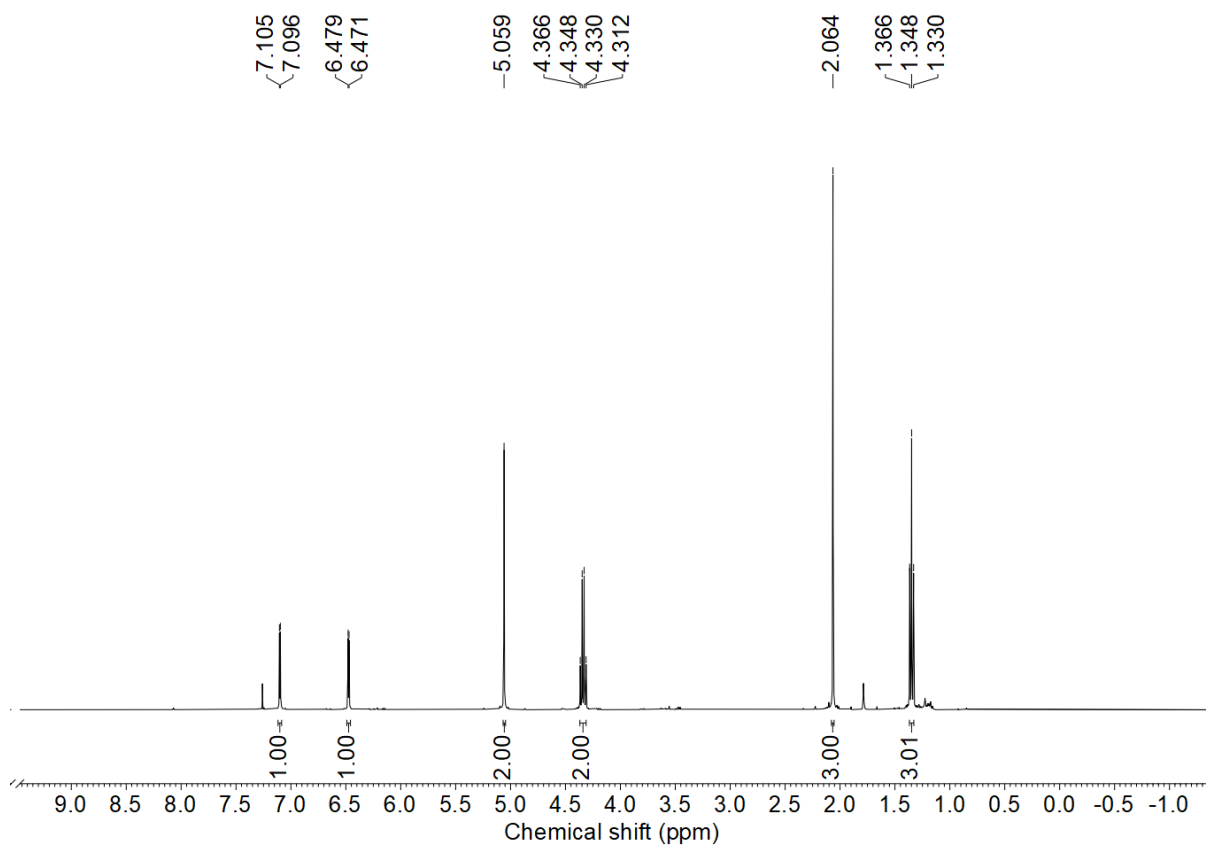

**Figure S5.** The  $^1\text{H}$ -NMR spectrum of **1a**.

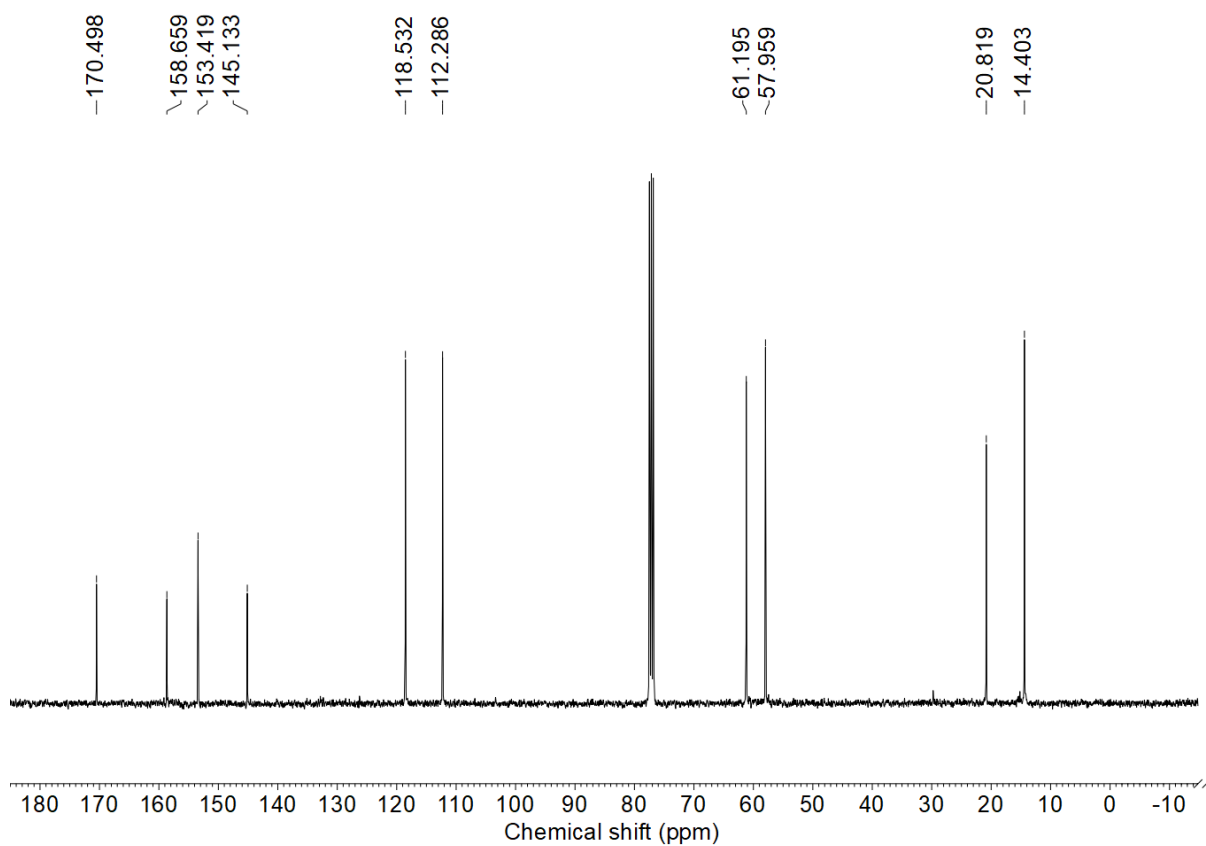

**Figure S6.** The  $^{13}\text{C}$ -NMR spectrum of **1a**.



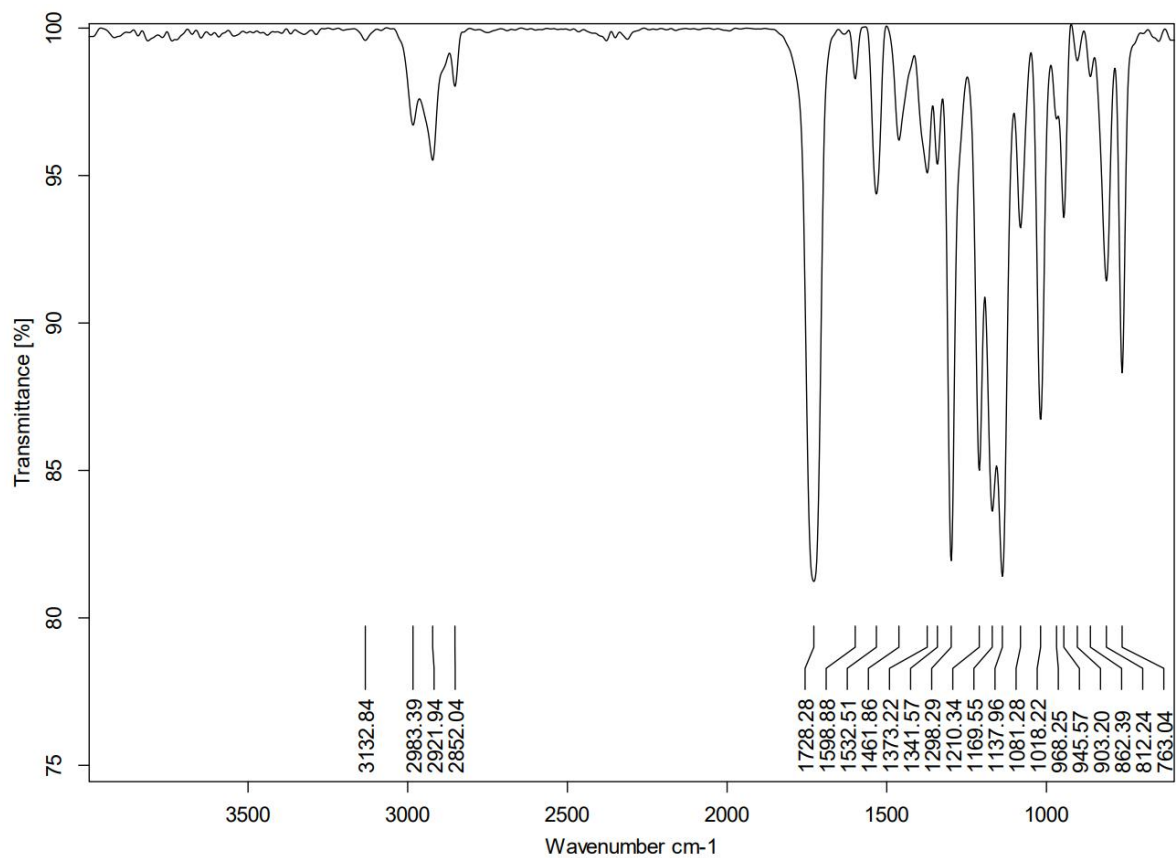

**Figure S7.** The FTIR spectrum of **1b**.

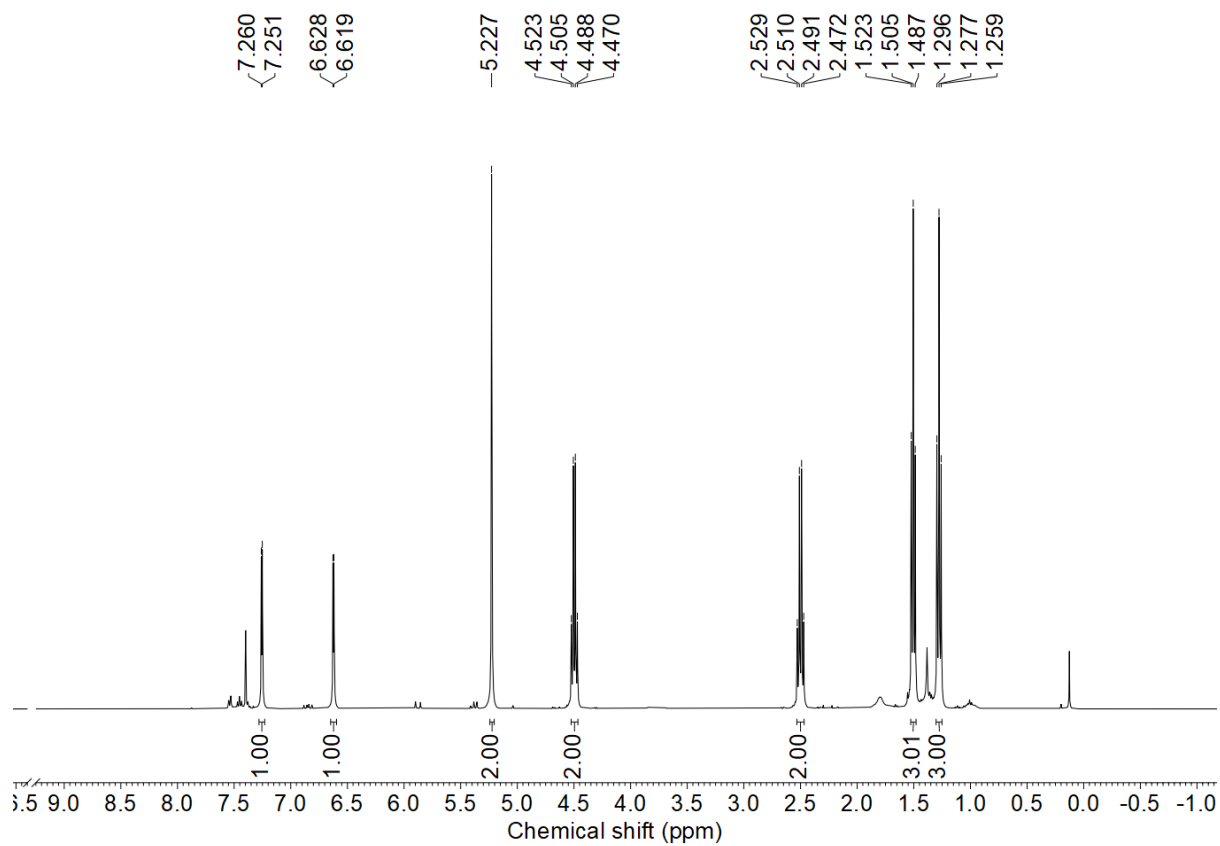

**Figure S8.** The  $^1\text{H}$ -NMR spectrum of **1b**.

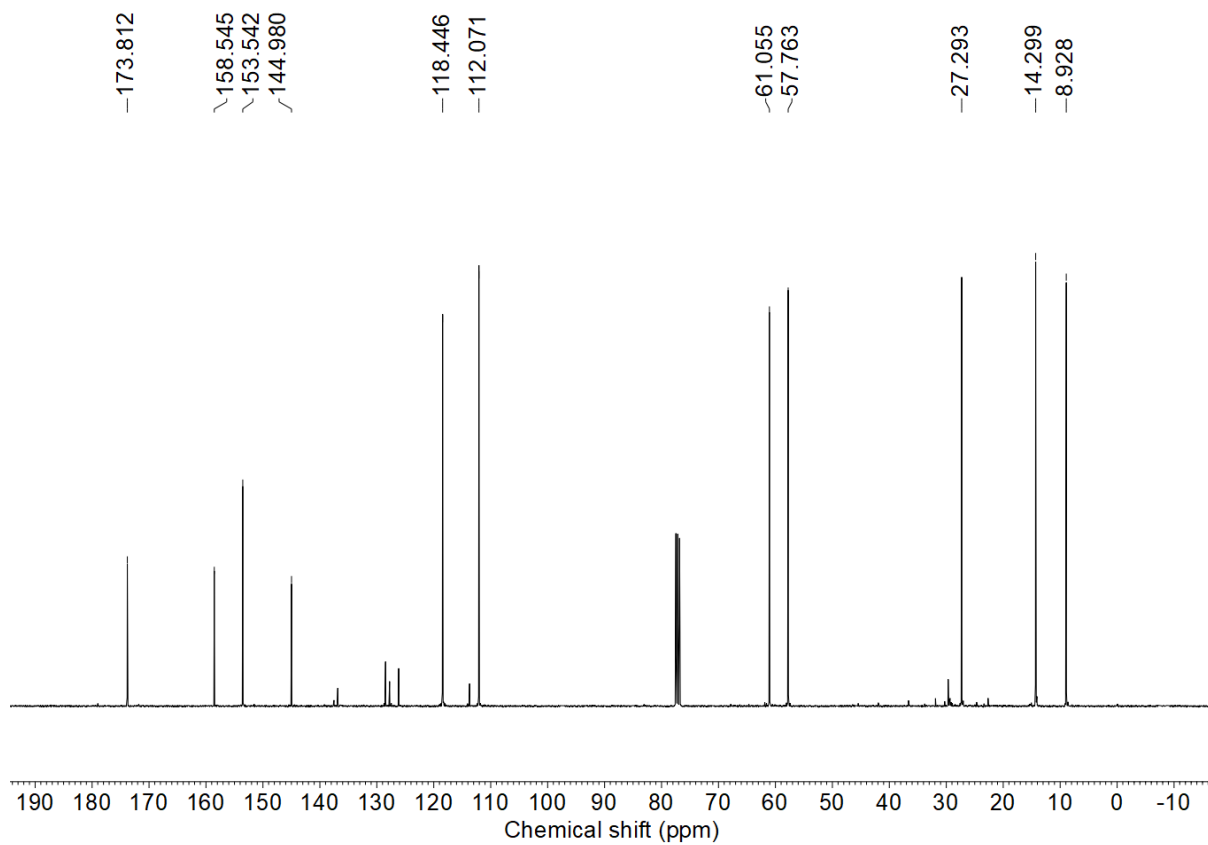

**Figure S9.** The  $^{13}\text{C}$ -NMR spectrum of **1b**.

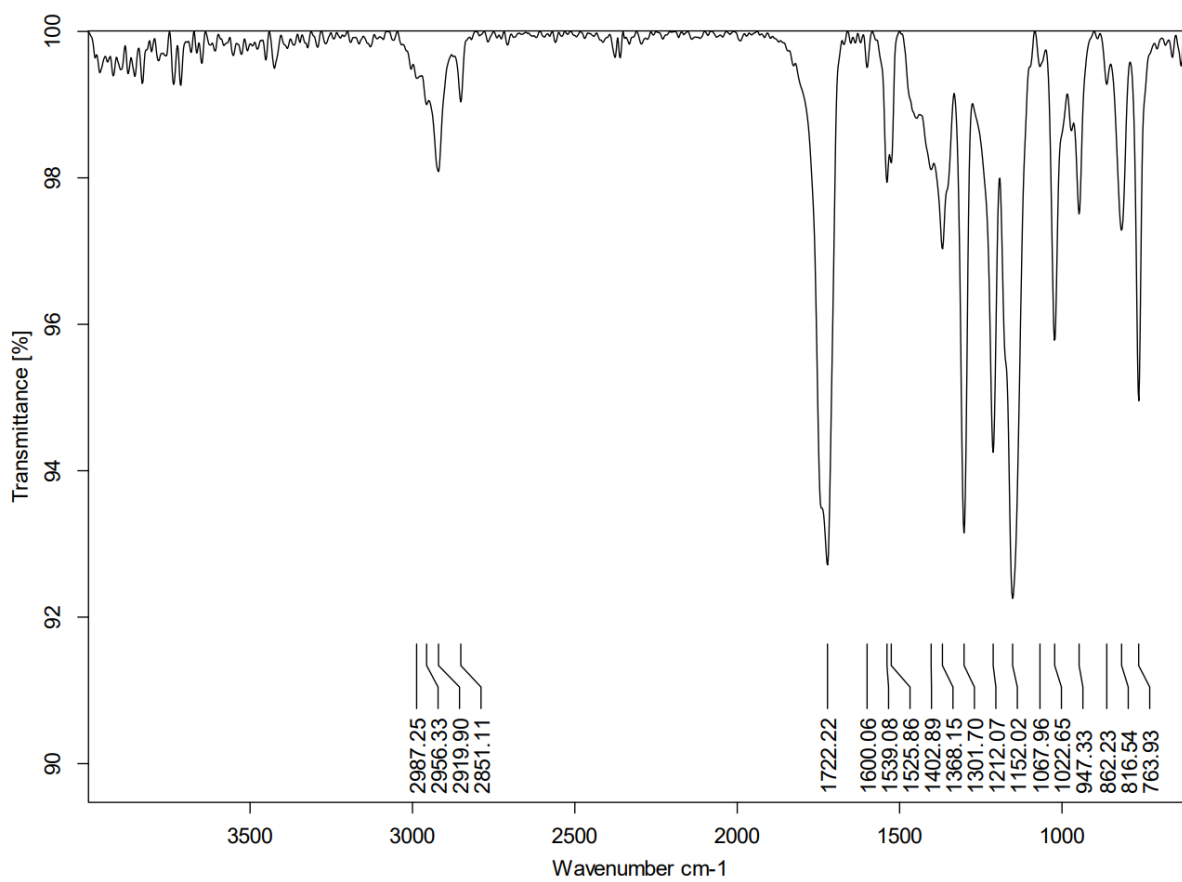

**Figure S10.** The FTIR spectrum of **1c**.

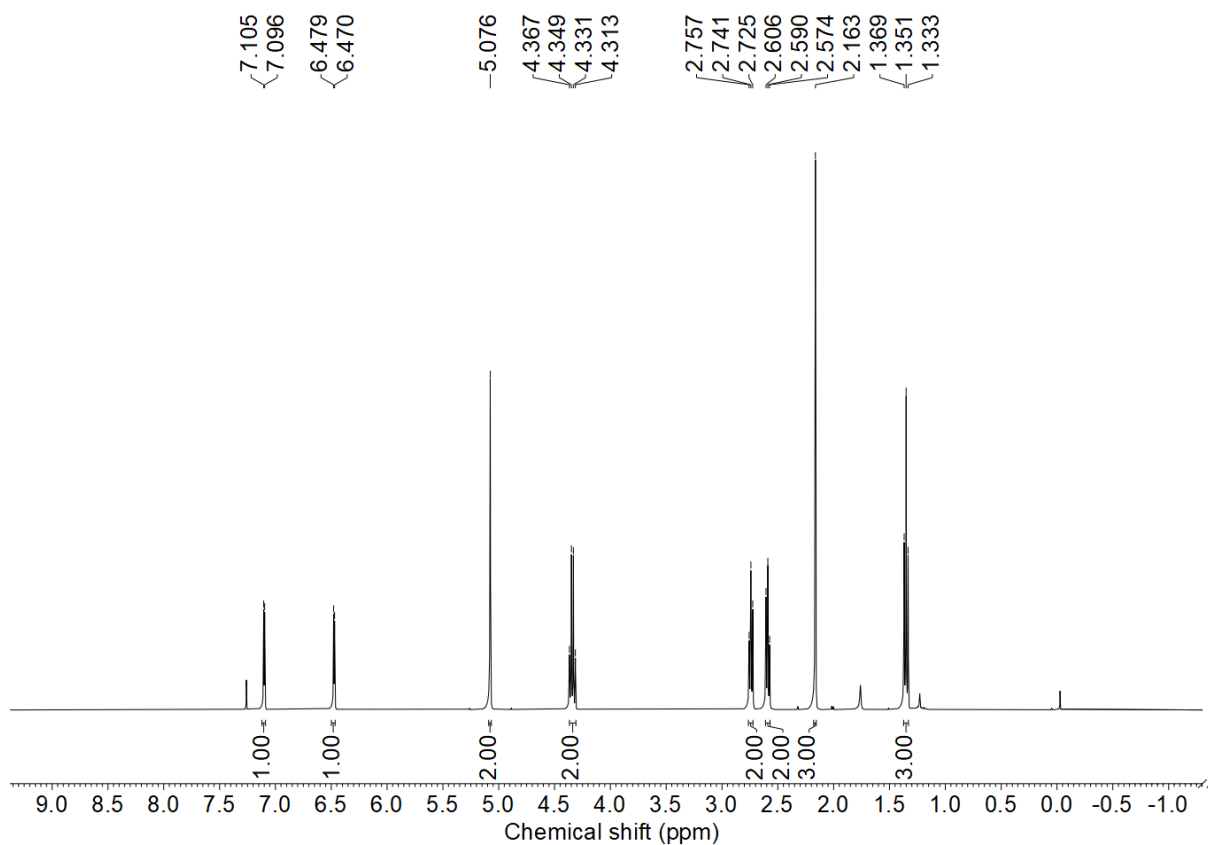

**Figure S11.** The  $^1\text{H}$ -NMR spectrum of **1c**.

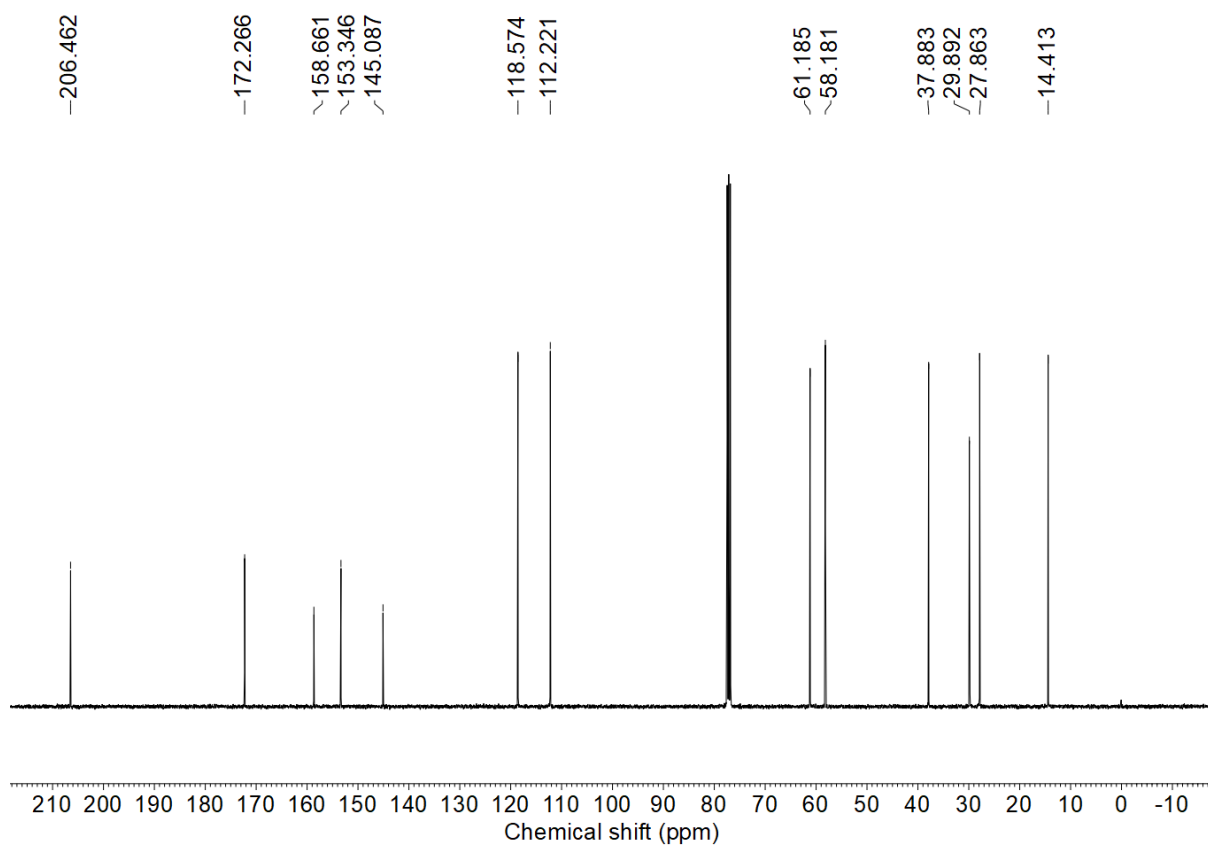

**Figure S12.** The  $^{13}\text{C}$ -NMR spectrum of **1c**.

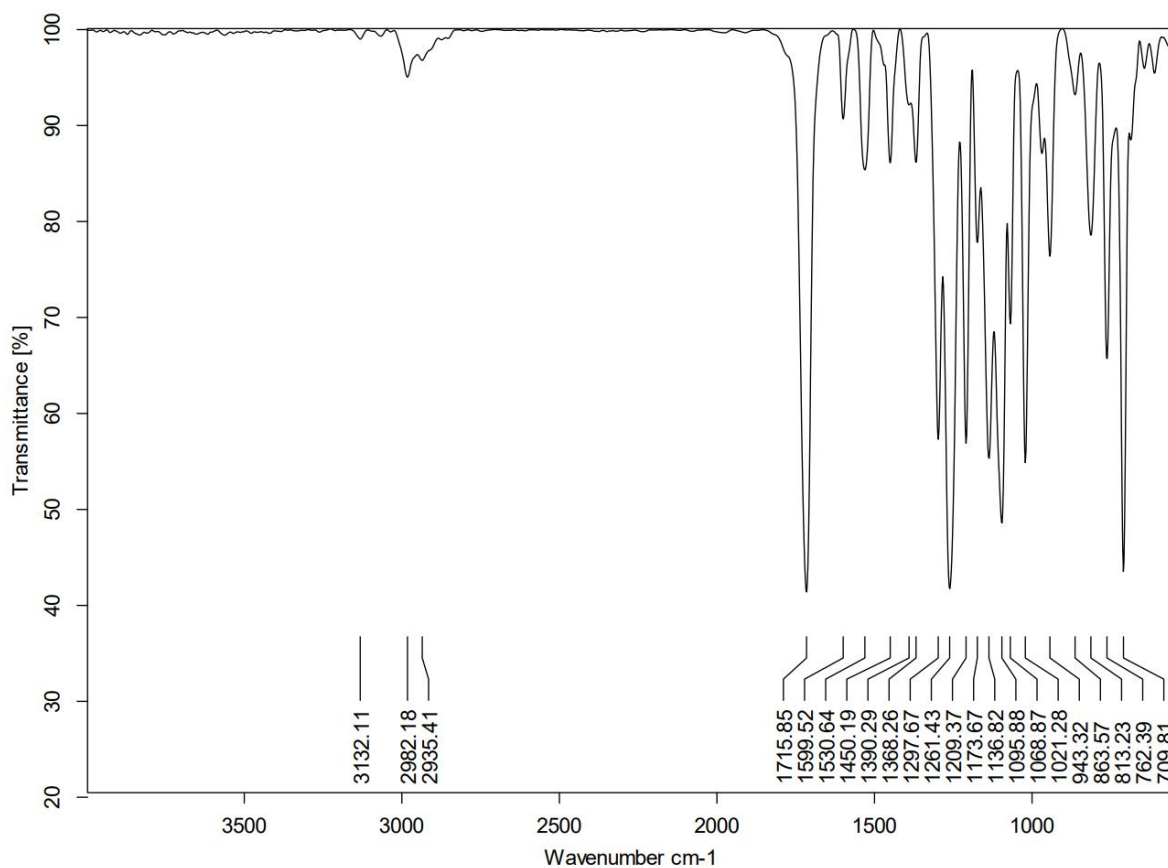

**Figure S13.** The FTIR spectrum of **1d**.

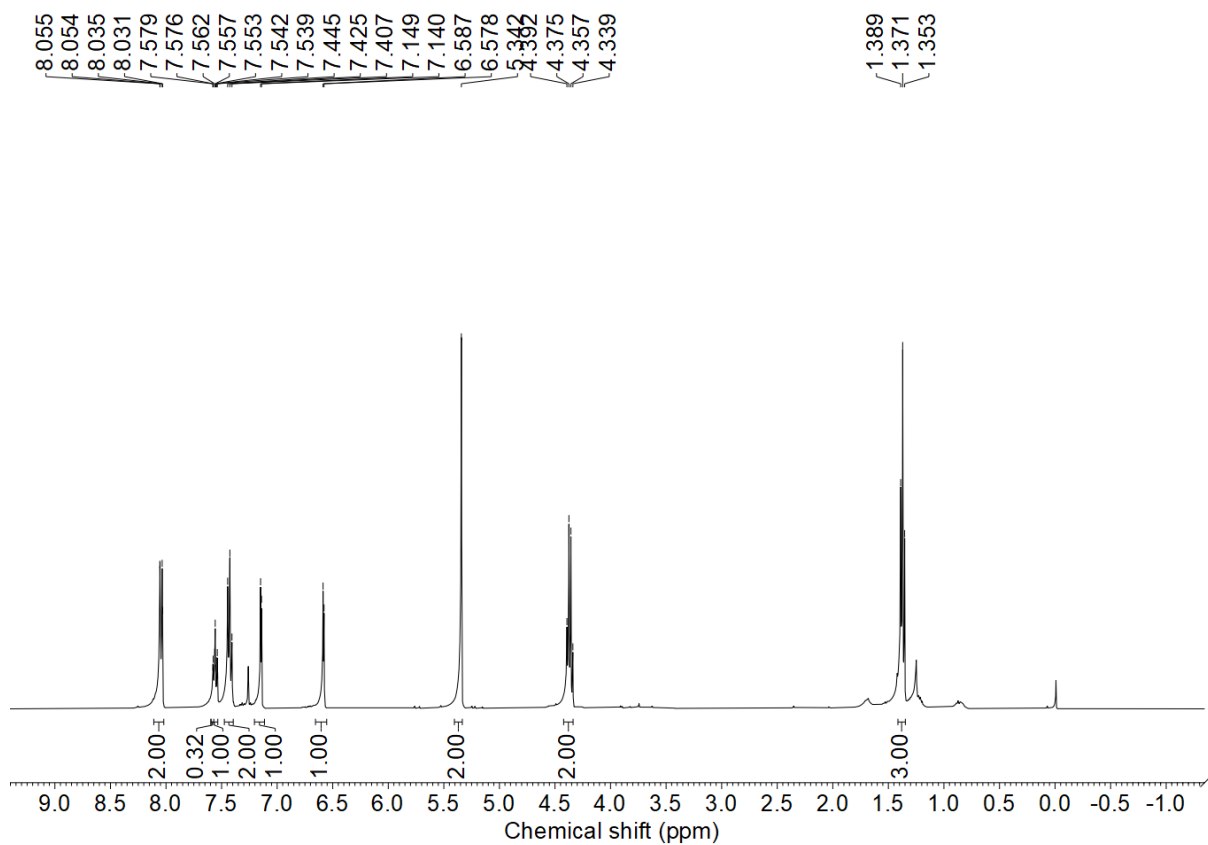

**Figure S14.** The <sup>1</sup>H-NMR spectrum of **1d**.

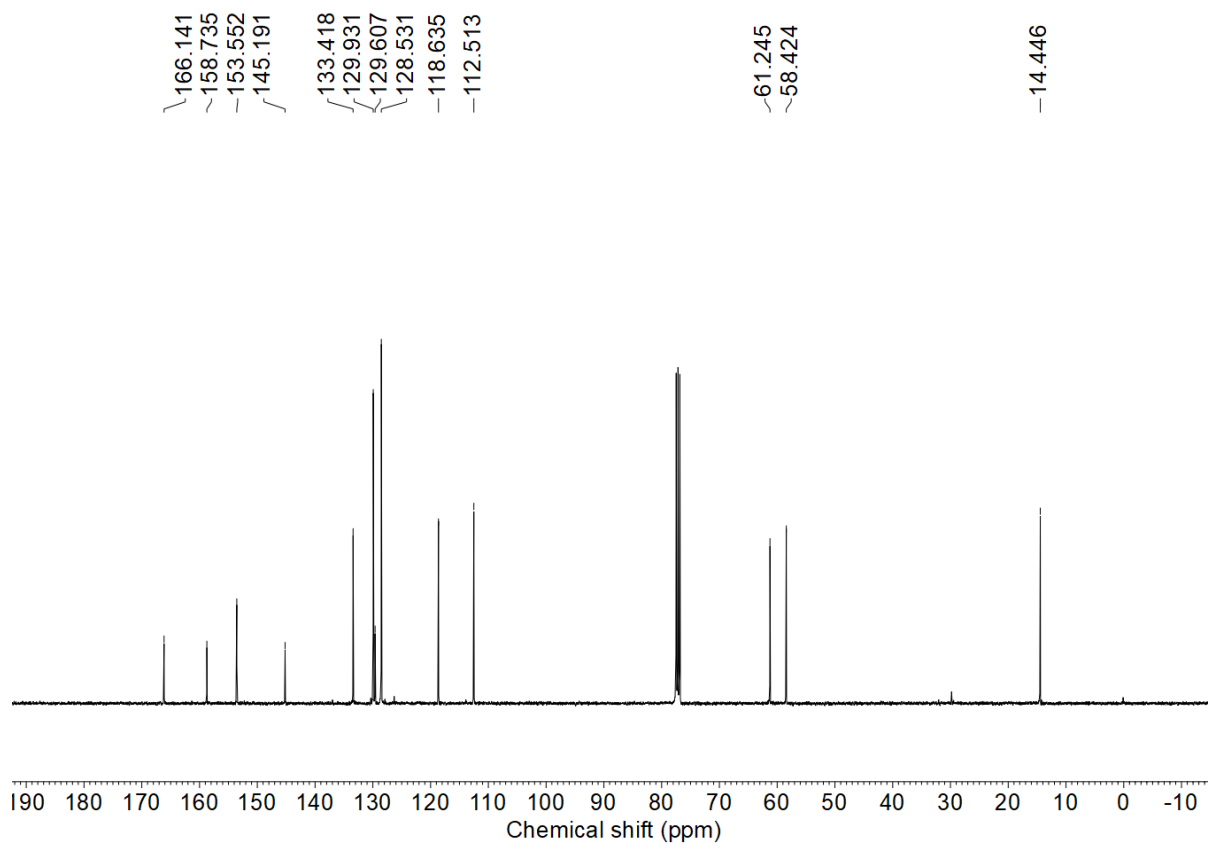

**Figure S15.** The  $^{13}\text{C}$ -NMR spectrum of **1d**.

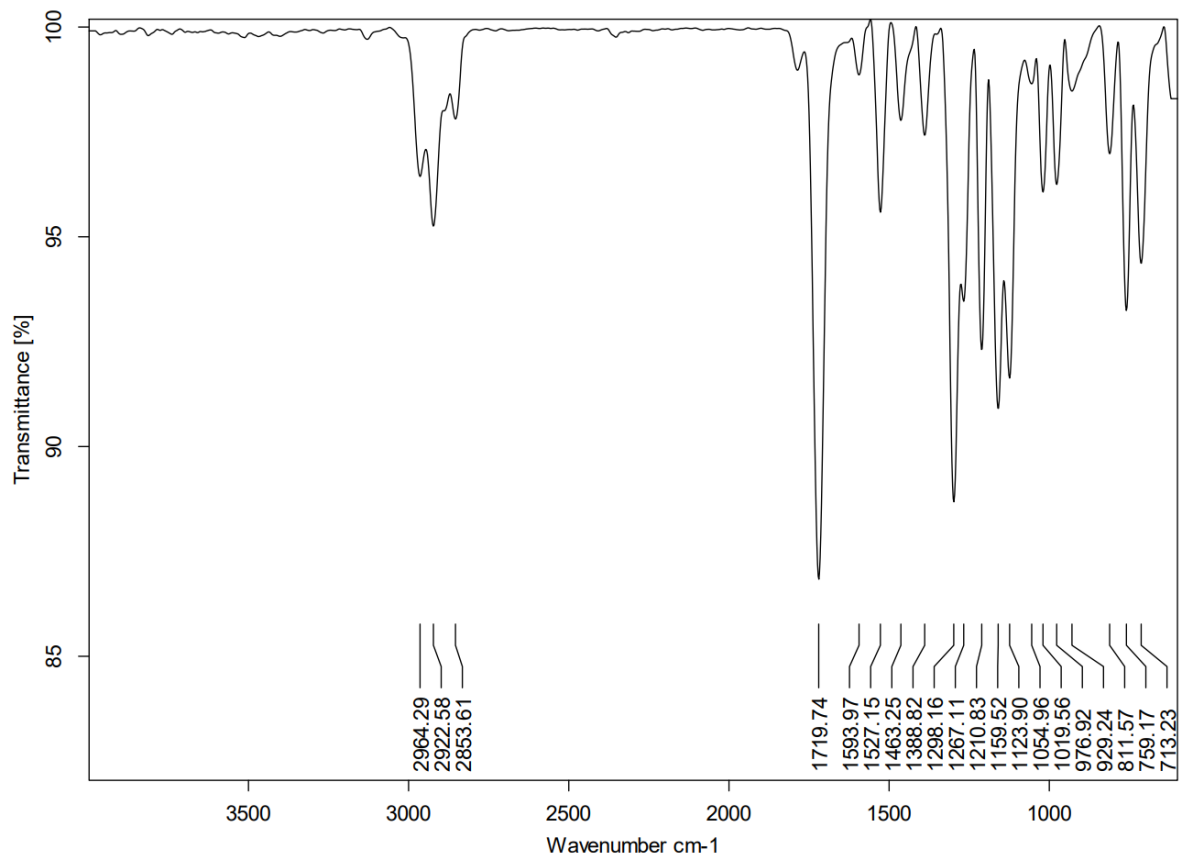

**Figure S16.** The FTIR spectrum of **2**.

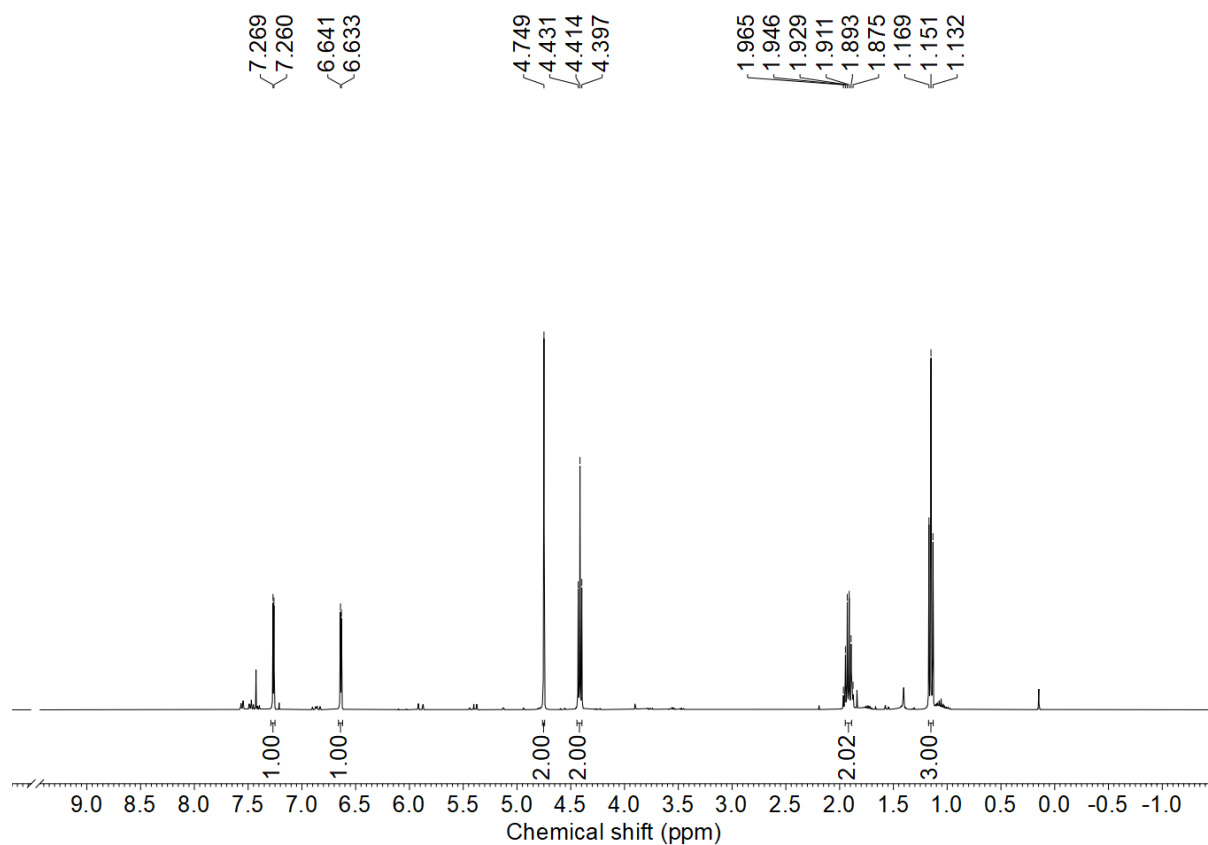

**Figure S17.** The  $^1\text{H}$ -NMR spectrum of **2**.

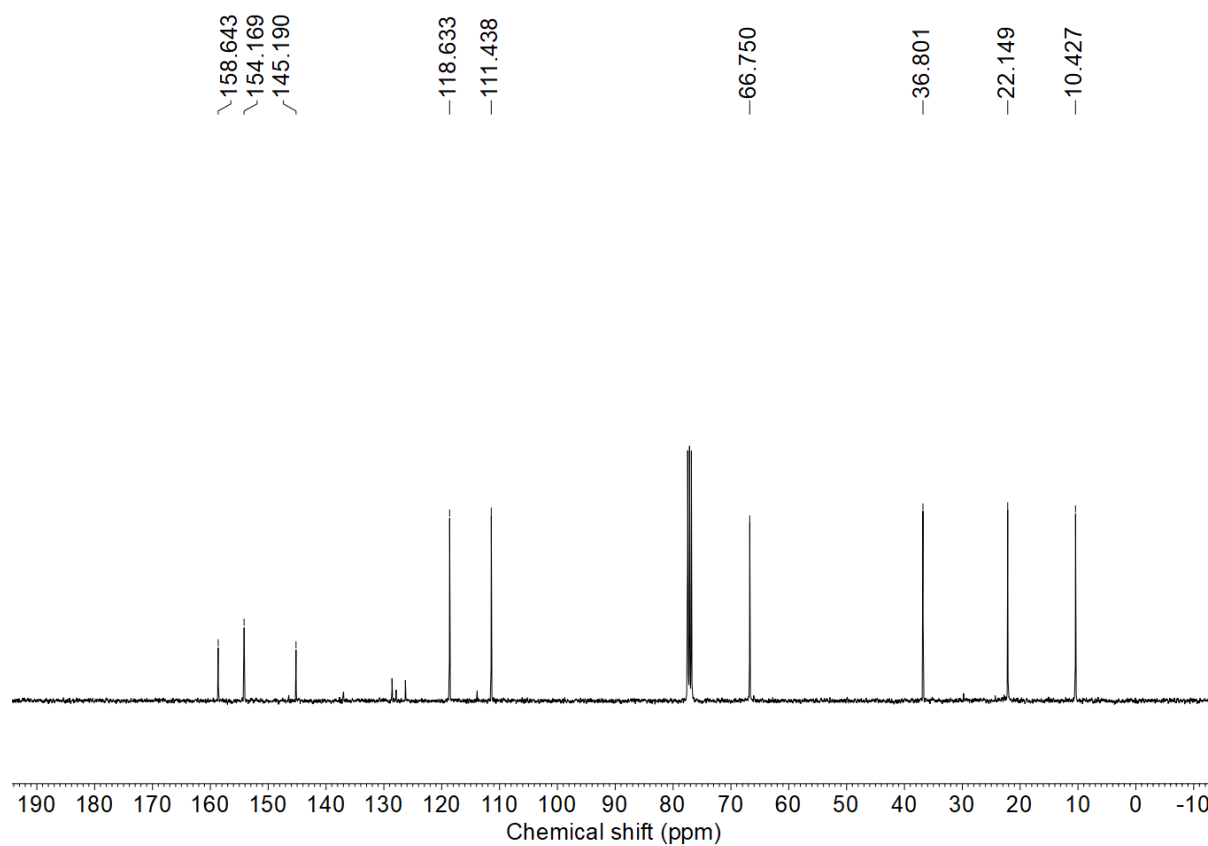

**Figure S18.** The  $^{13}\text{C}$ -NMR spectrum of **2**.

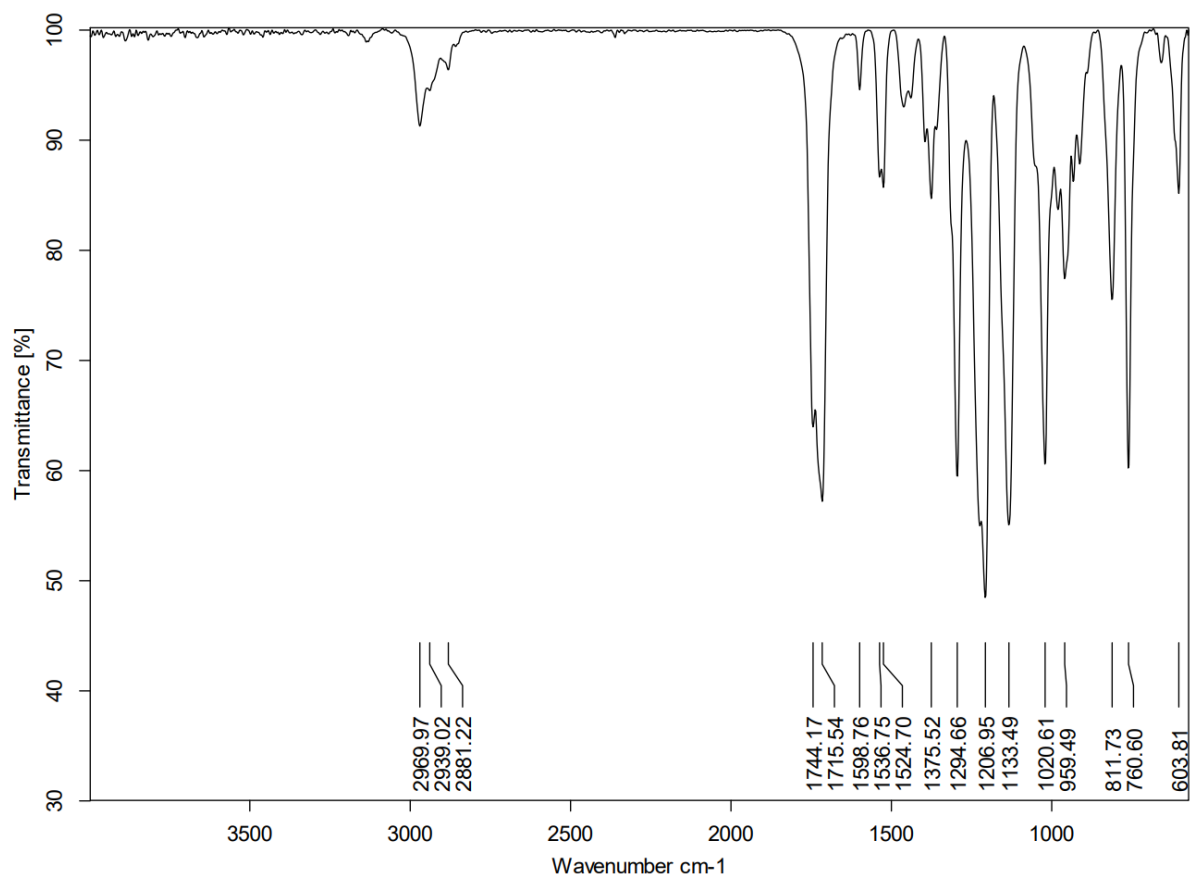

**Figure S19.** The FTIR spectrum of **2a**.

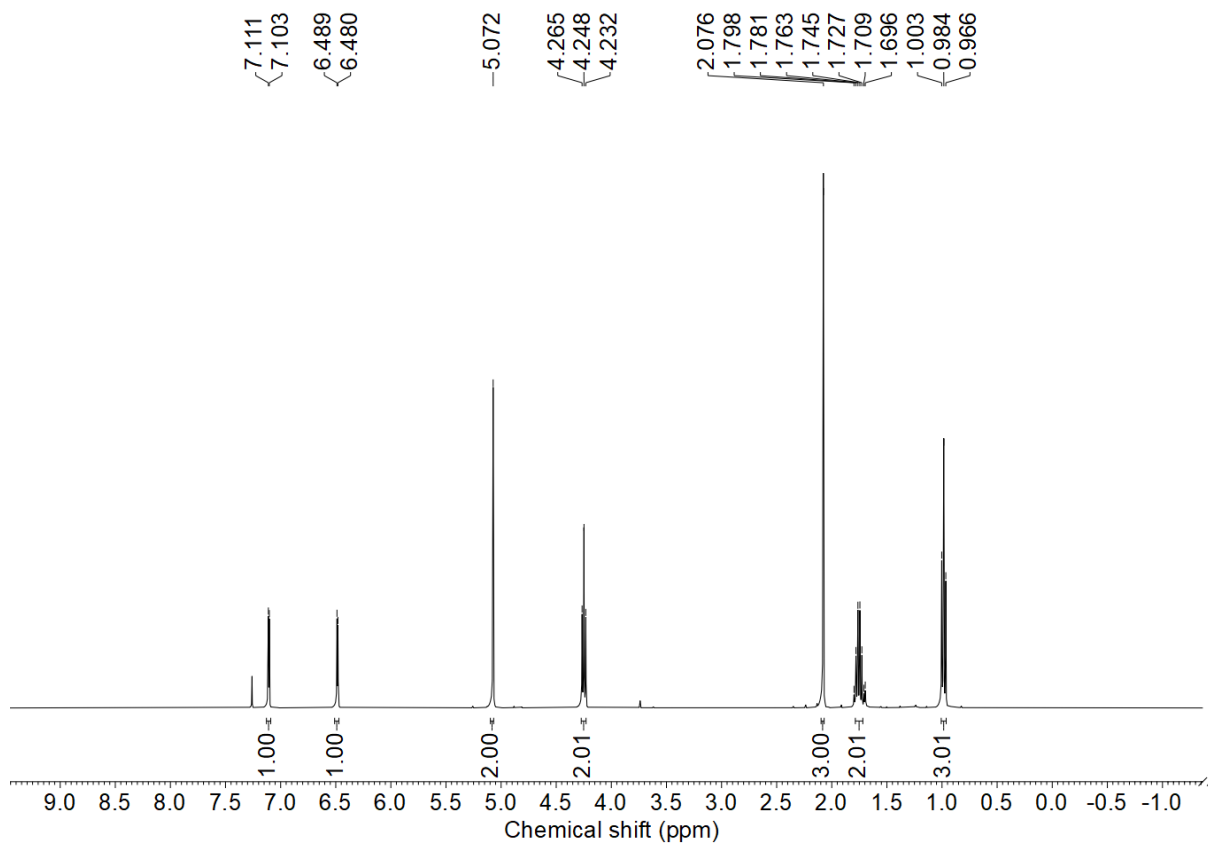

**Figure S20.** The <sup>1</sup>H-NMR spectrum of **2a**.

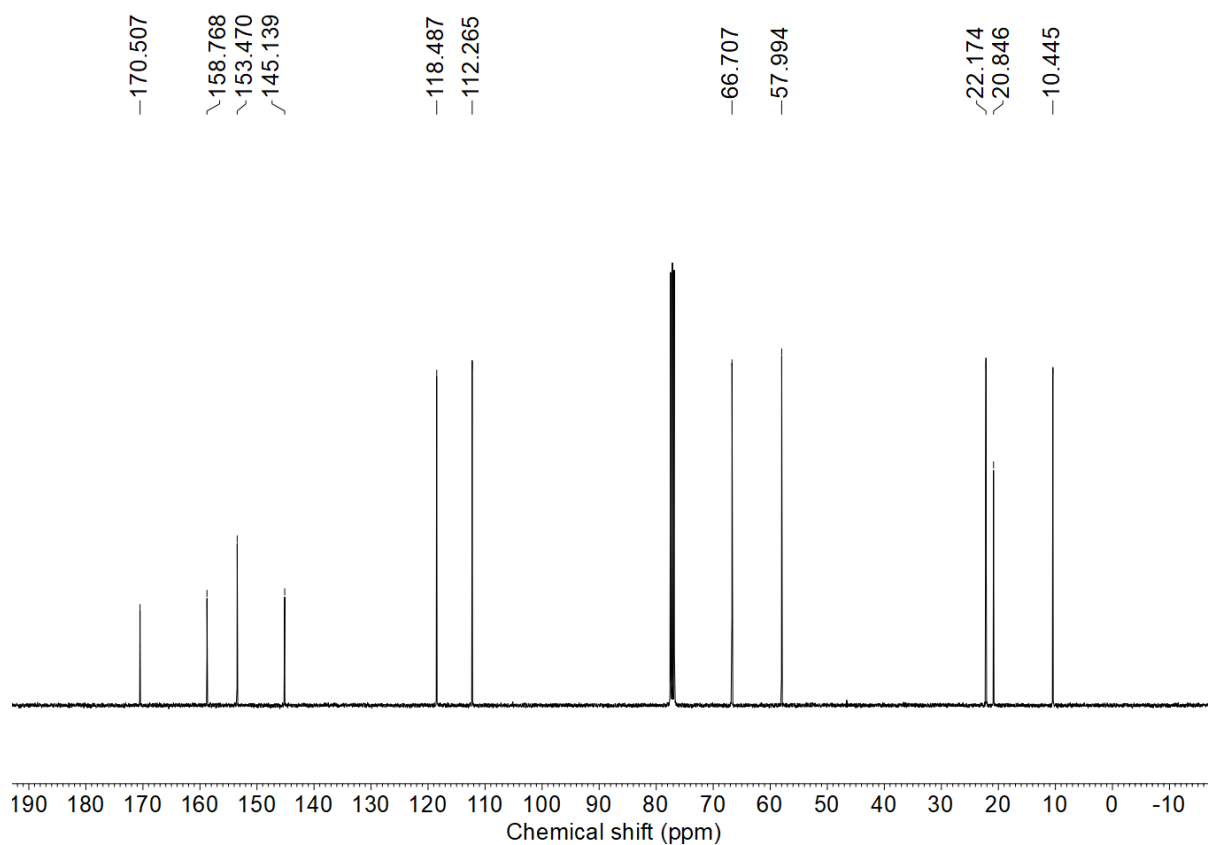

**Figure S21.** The  $^{13}\text{C}$ -NMR spectrum of **2a**.

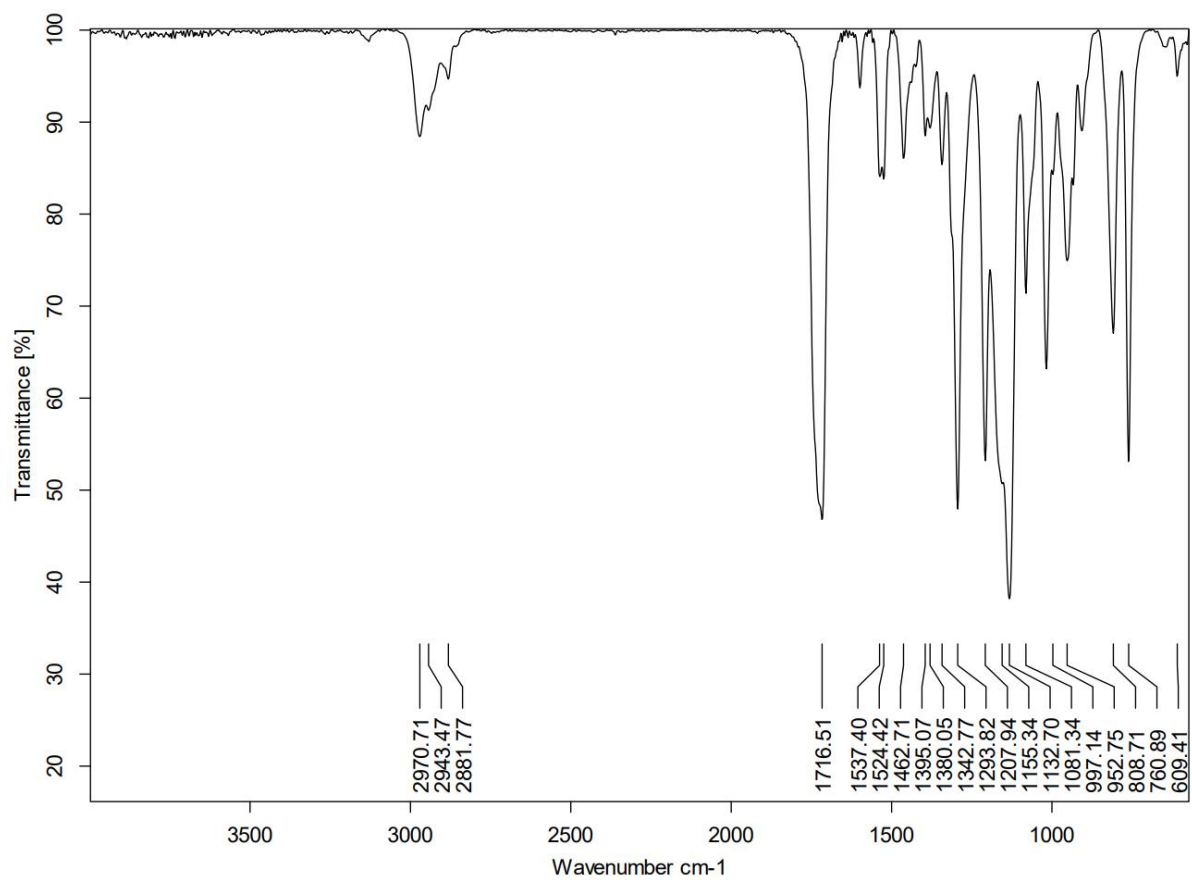

**Figure S22.** The FTIR spectrum of **2b**.





**Figure S23.** The  $^1\text{H}$ -NMR spectrum of **2b**.

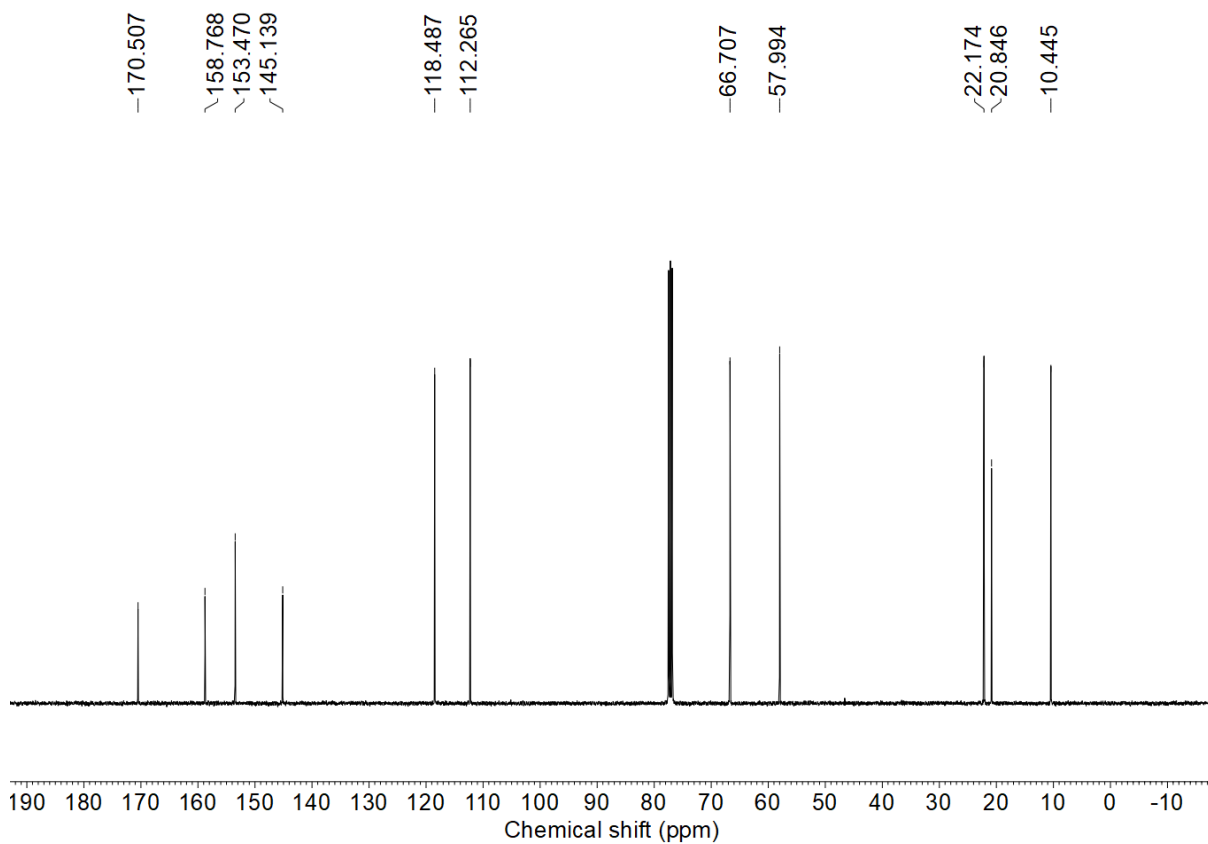

**Figure S24.** The  $^{13}\text{C}$ -NMR spectrum of **2b**.

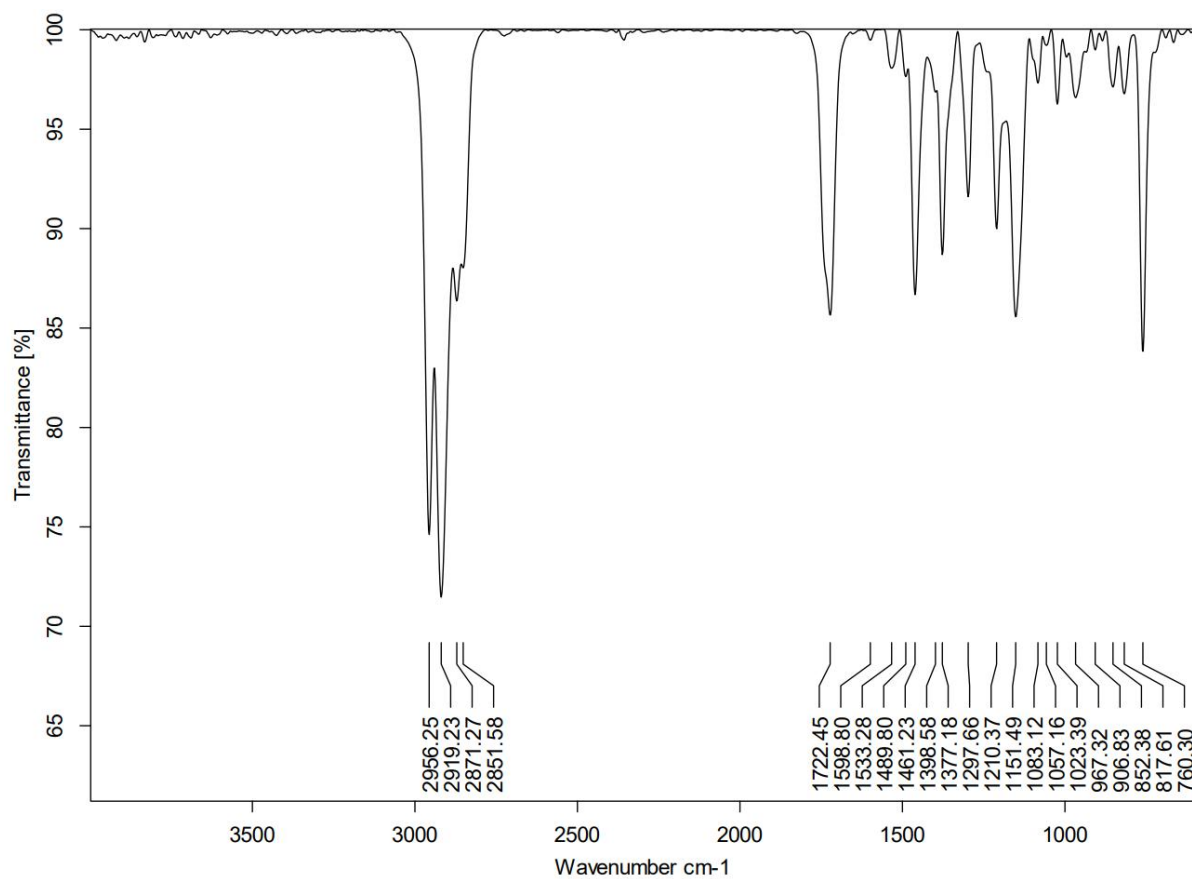

**Figure S25.** The FTIR spectrum of **2c**.

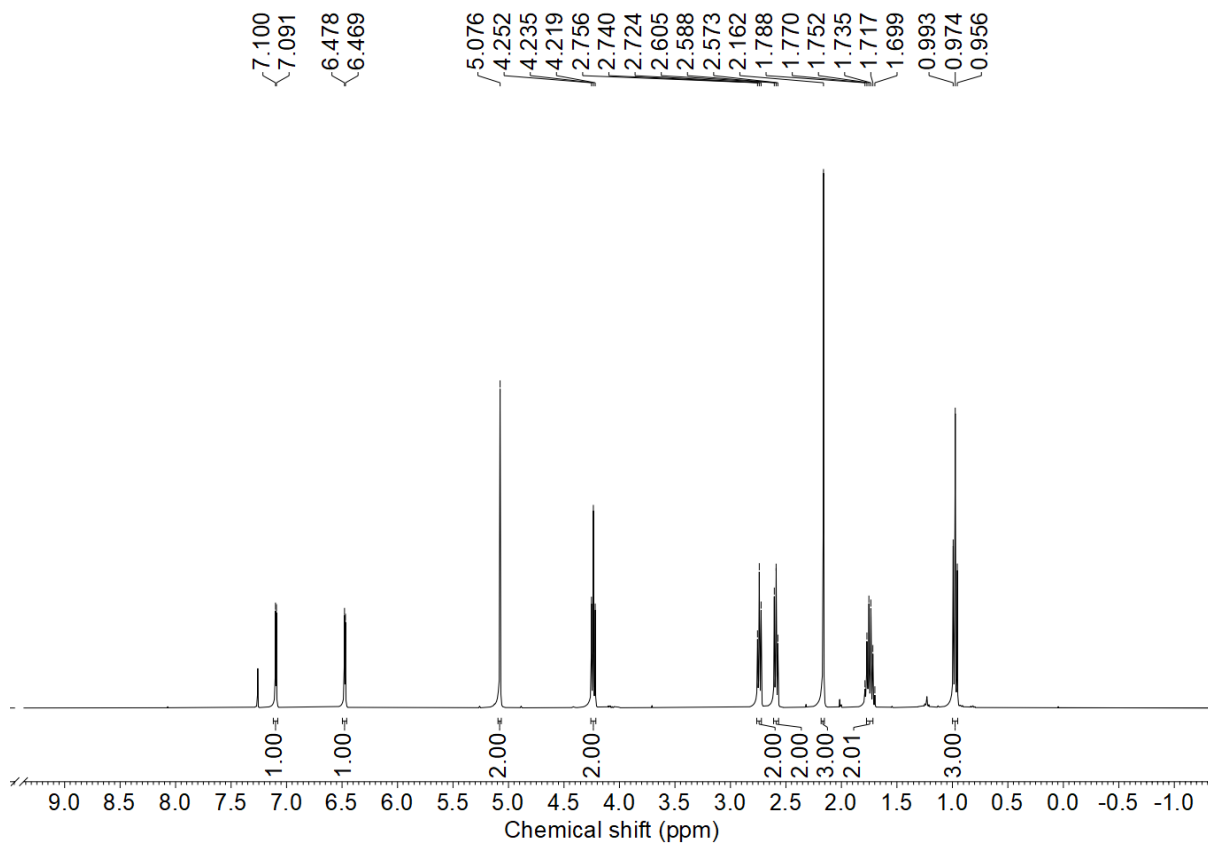

**Figure S26.** The <sup>1</sup>H-NMR spectrum of **2c**.

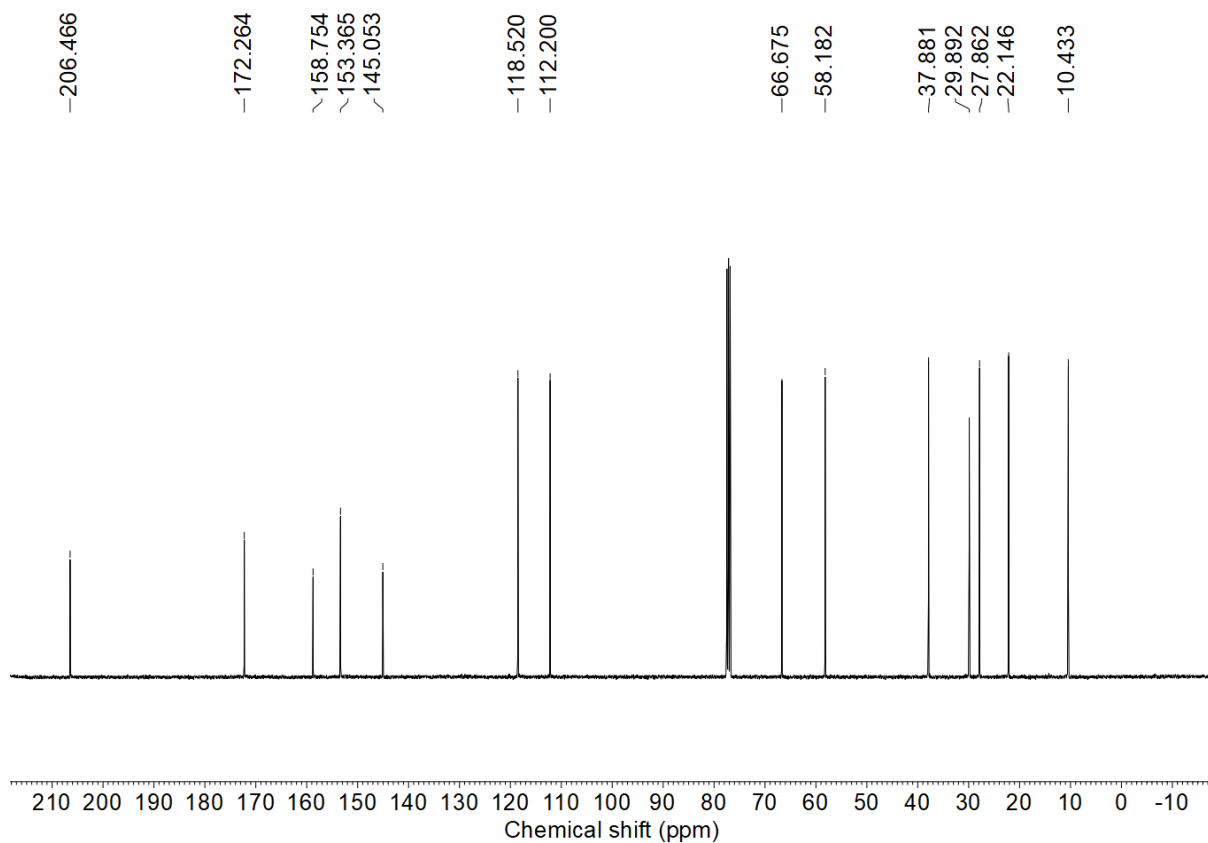

**Figure S27.** The  $^{13}\text{C}$ -NMR spectrum of **2c**.

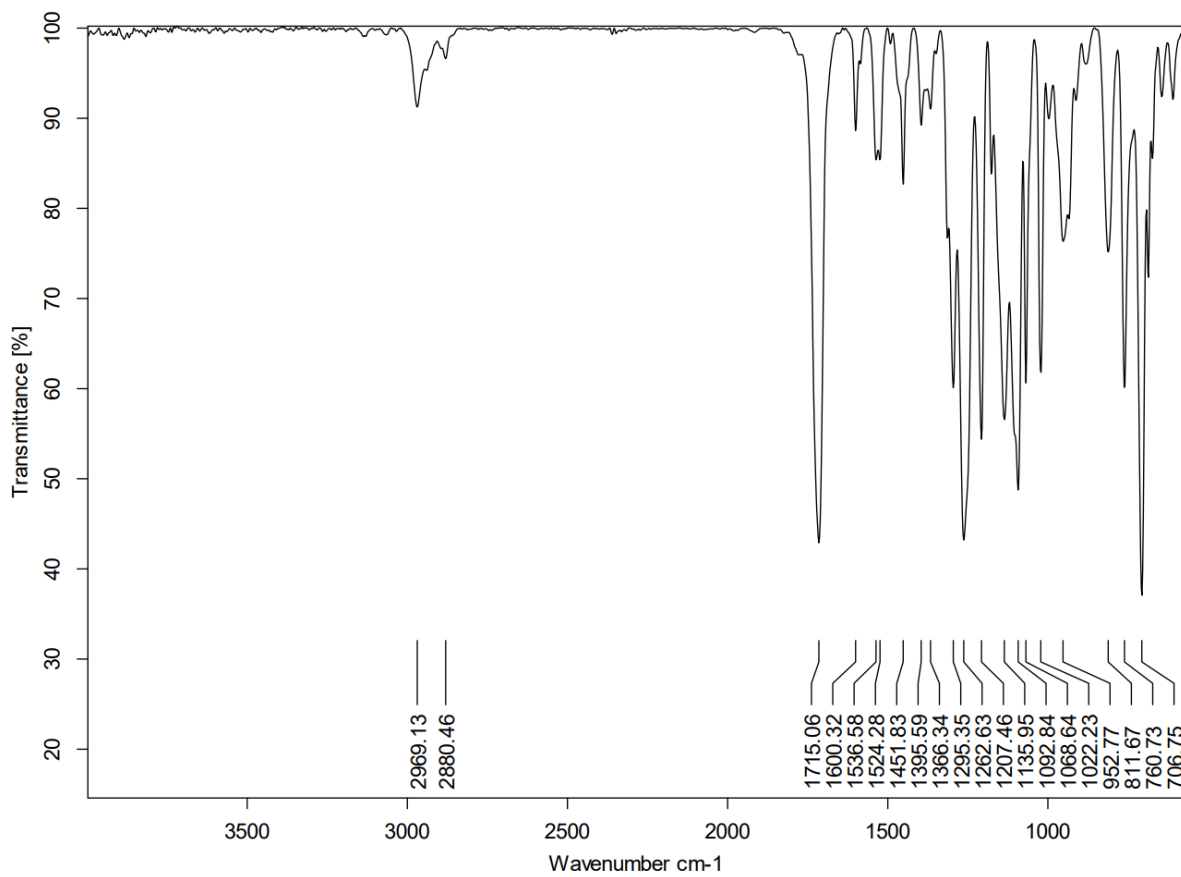

**Figure S28.** The FTIR spectrum of **2d**.

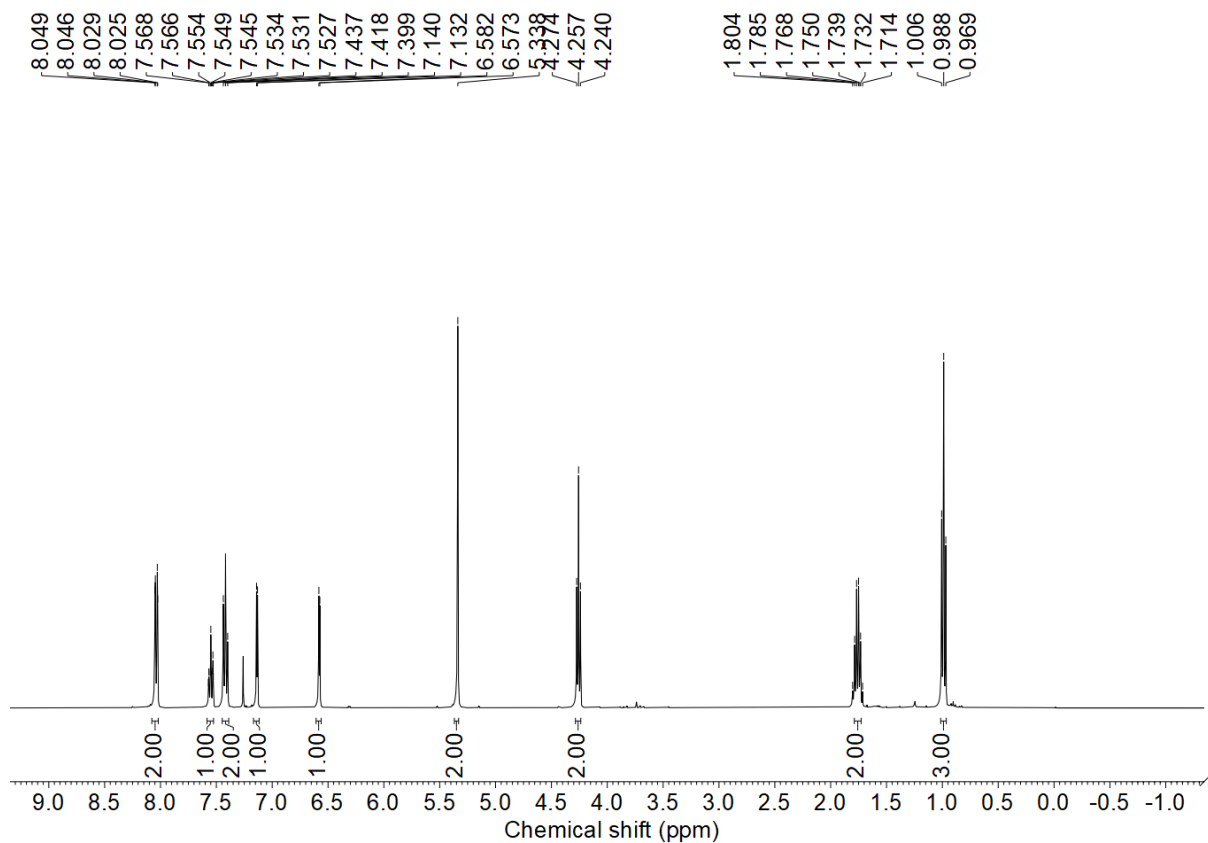

**Figure S29.** The  $^1\text{H}$ -NMR spectrum of **2d**.

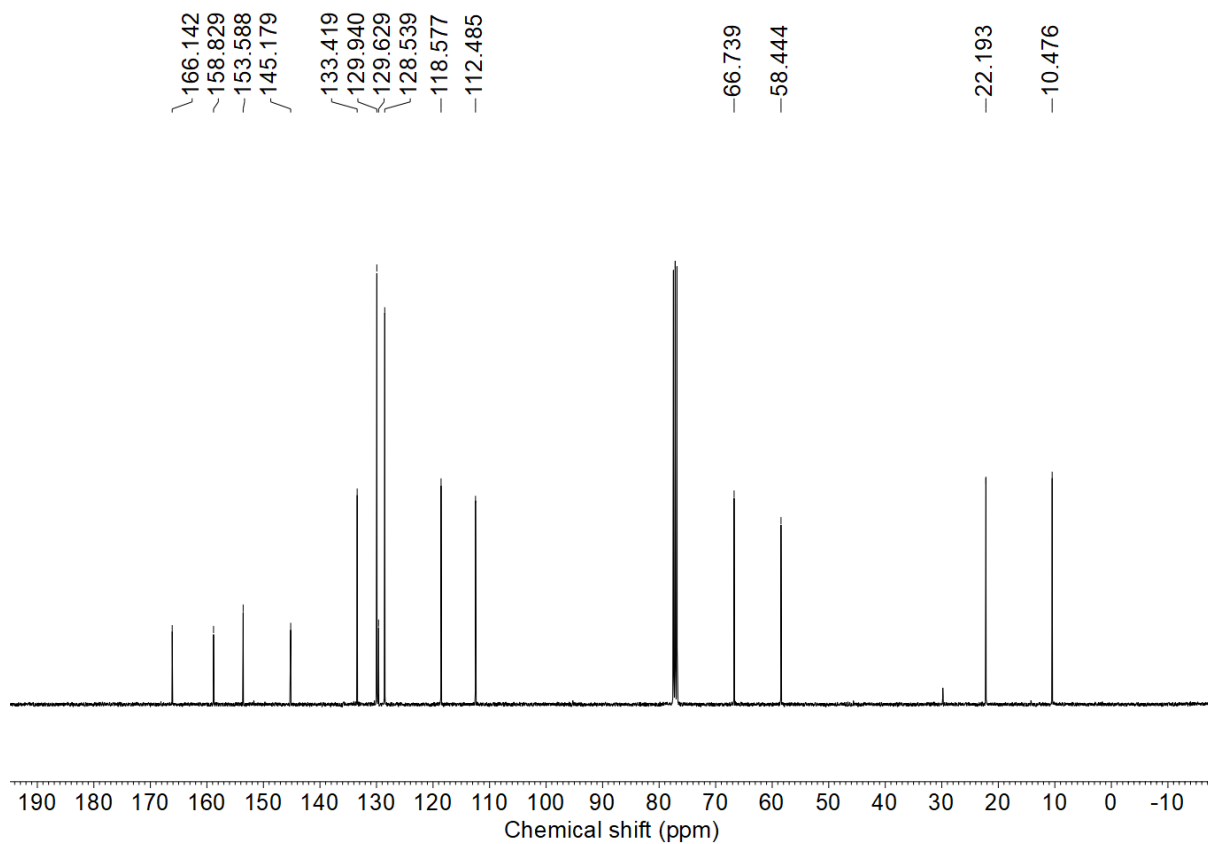

**Figure S30.** The  $^{13}\text{C}$ -NMR spectrum of **2d**.

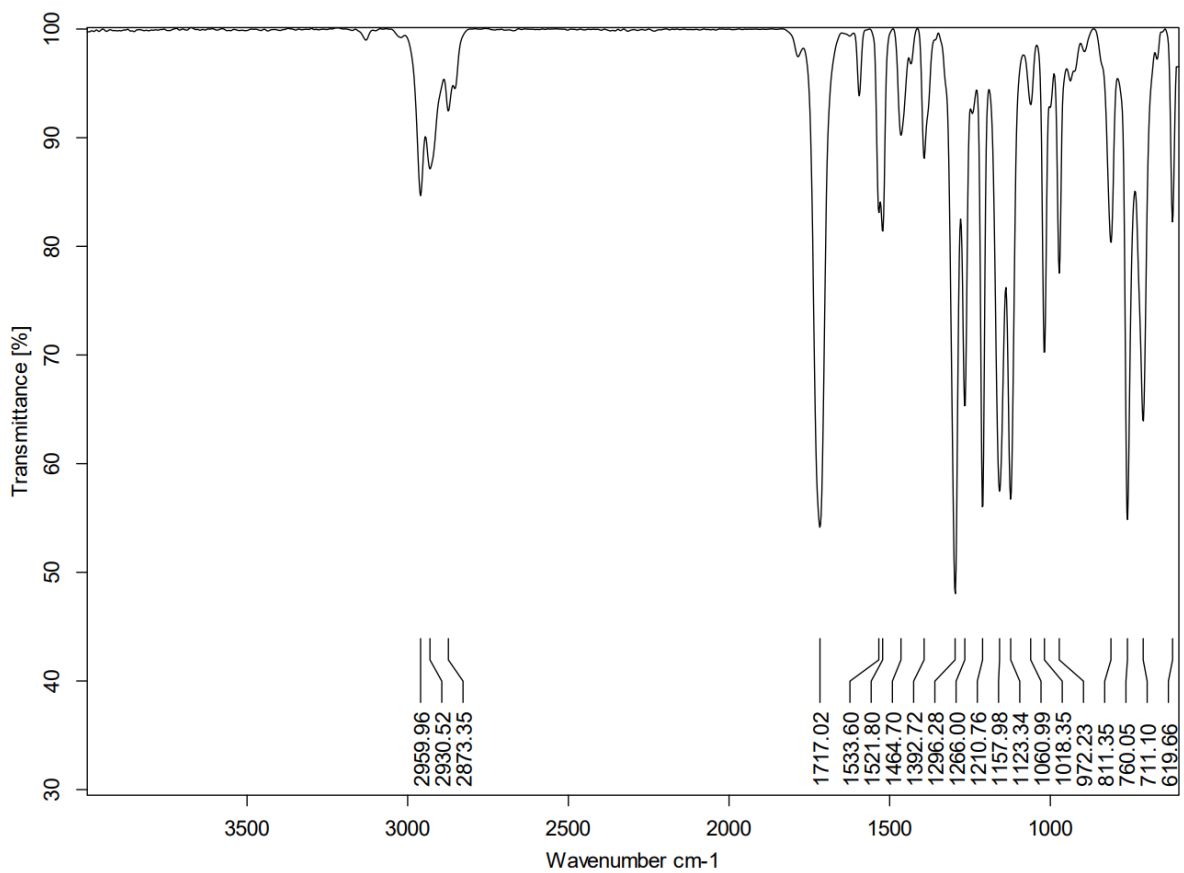

**Figure S31.** The FTIR spectrum of **3**.

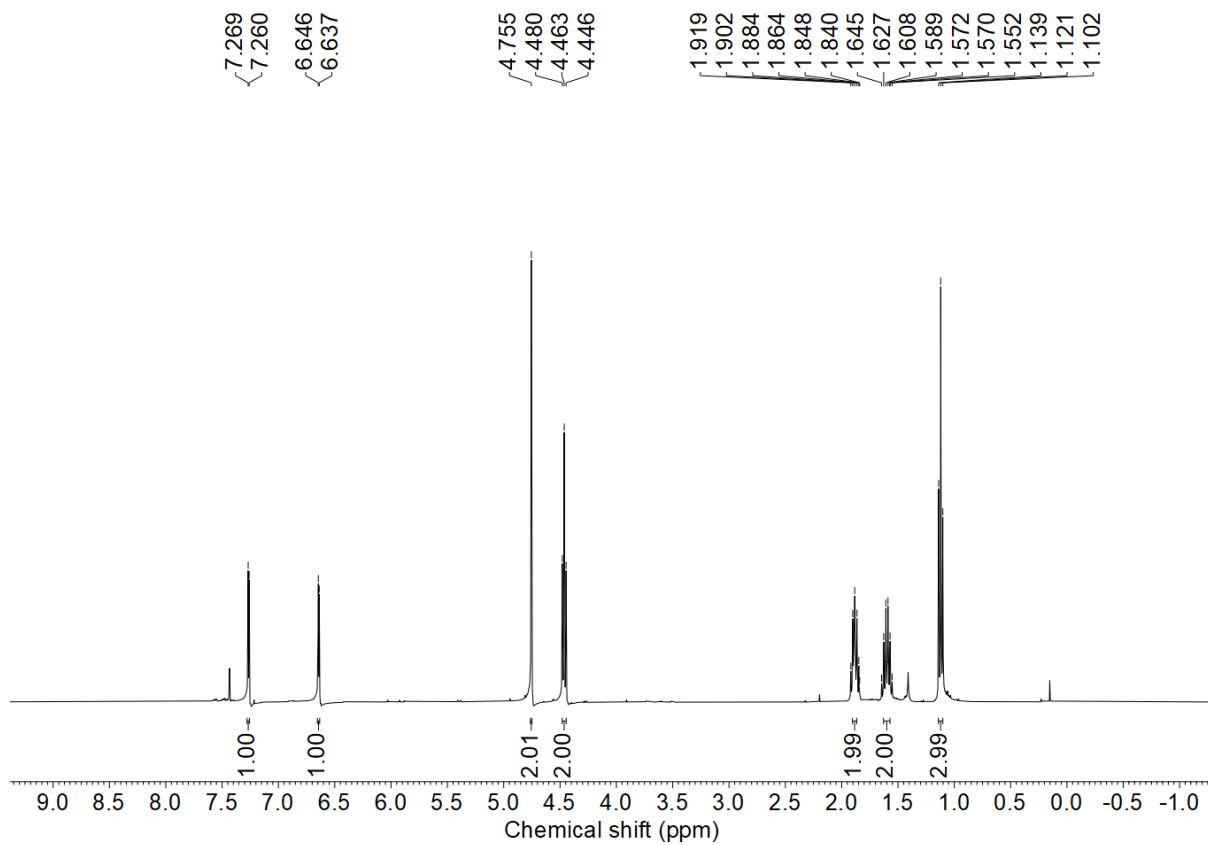

**Figure S32.** The <sup>1</sup>H-NMR spectrum of **3**.

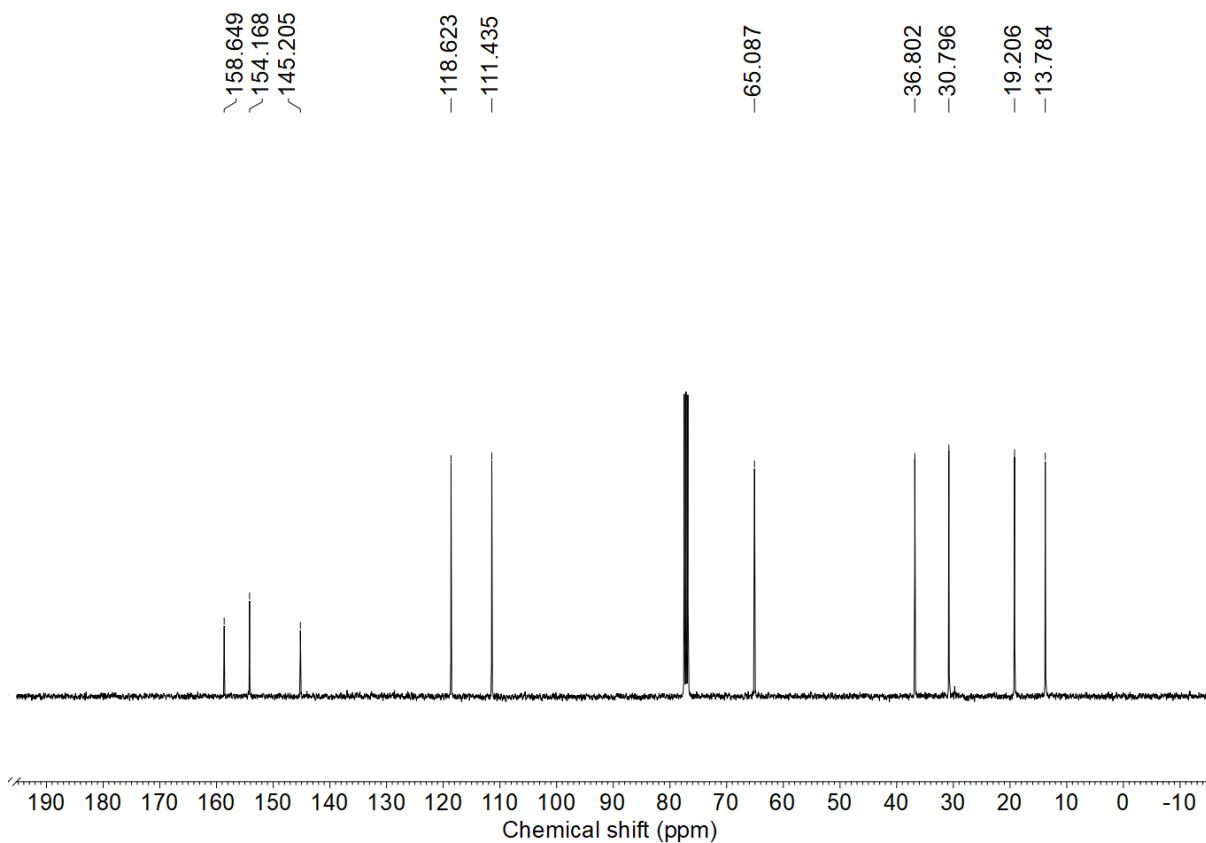

**Figure S33.** The  $^{13}\text{C}$ -NMR spectrum of **3**.

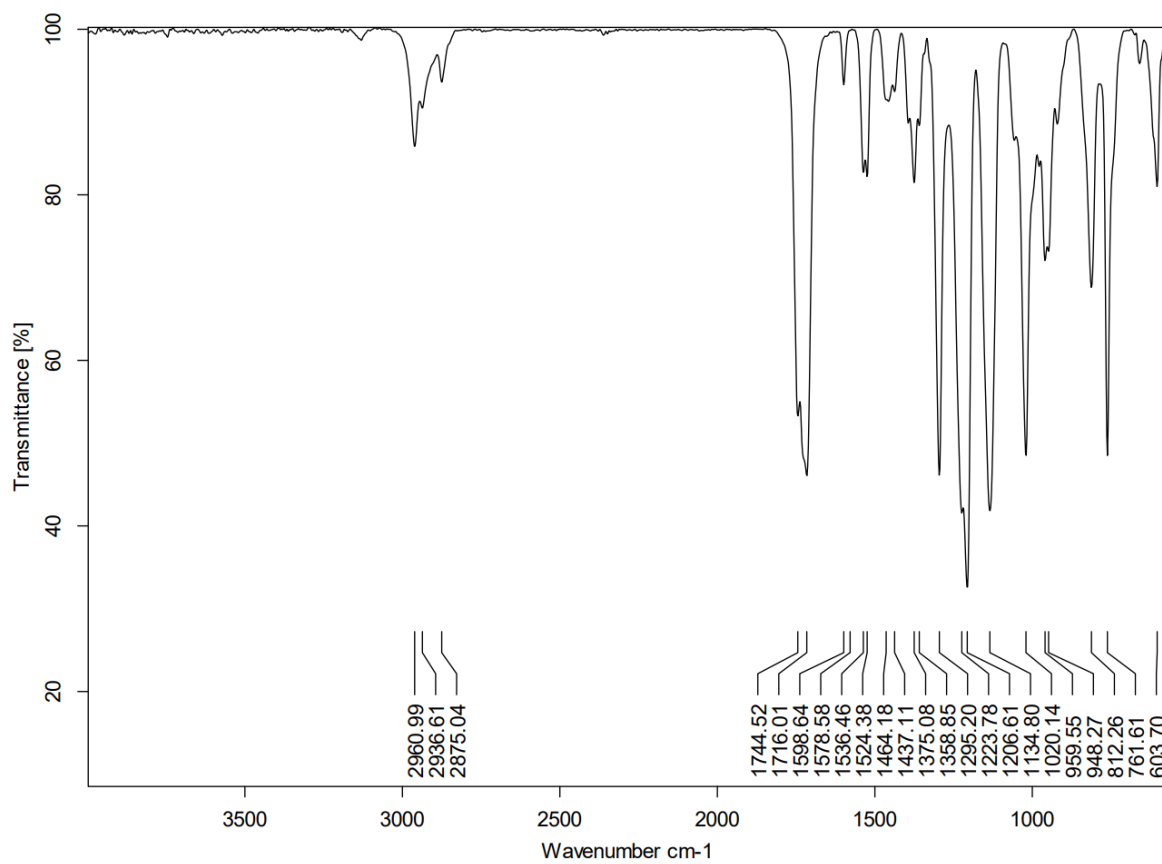

**Figure S34.** The FTIR spectrum of **3a**.

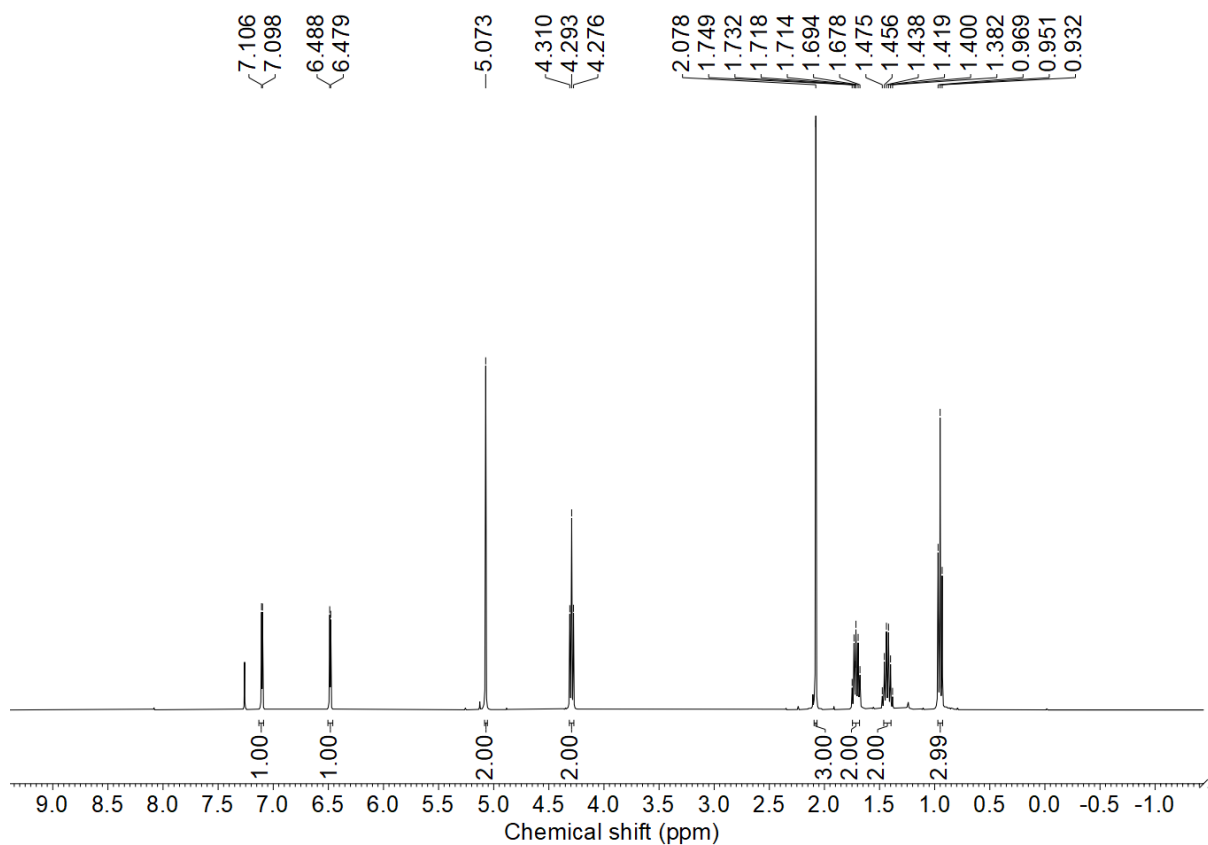

**Figure S35.** The <sup>1</sup>H-NMR spectrum of **3a**.

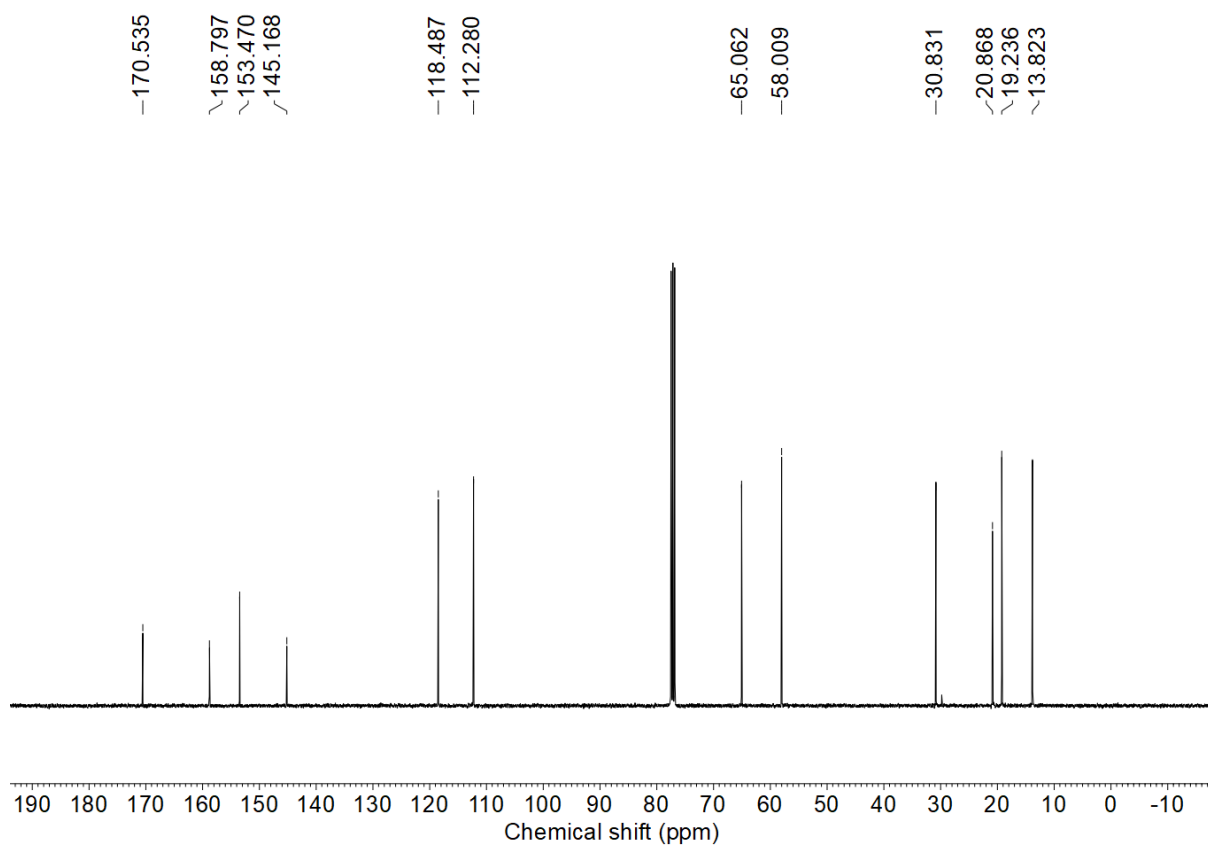

**Figure S36.** The <sup>13</sup>C-NMR spectrum of **3a**.

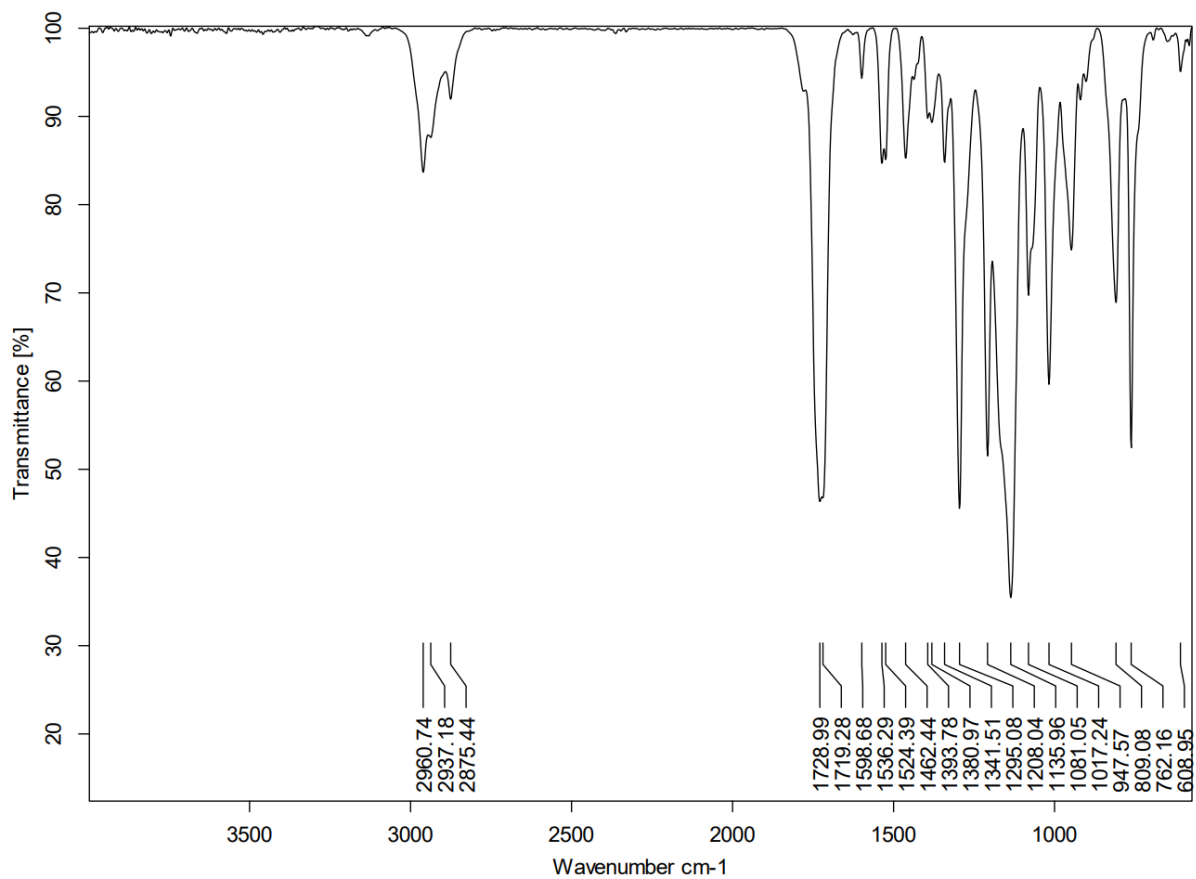

**Figure S37.** The FTIR spectrum of **3b**.

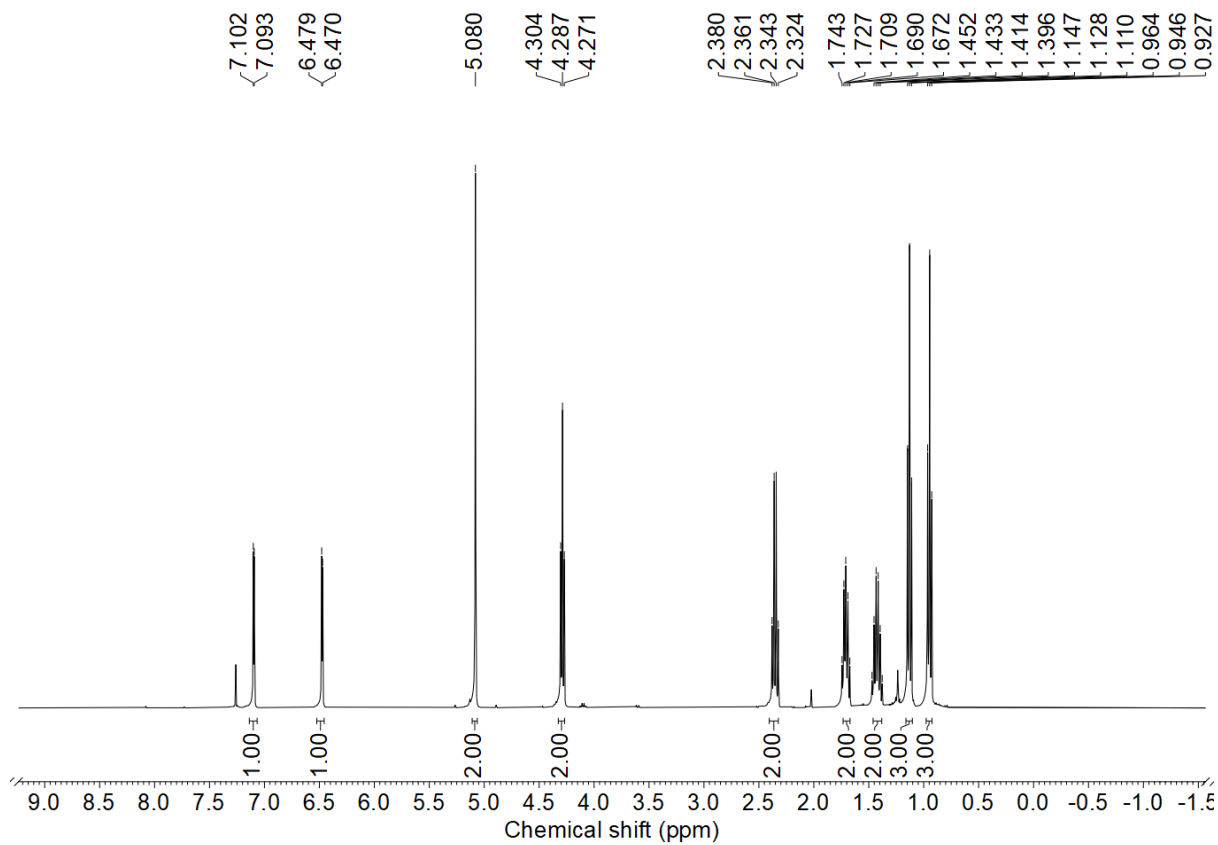

**Figure S38.** The <sup>1</sup>H-NMR spectrum of **3b**.



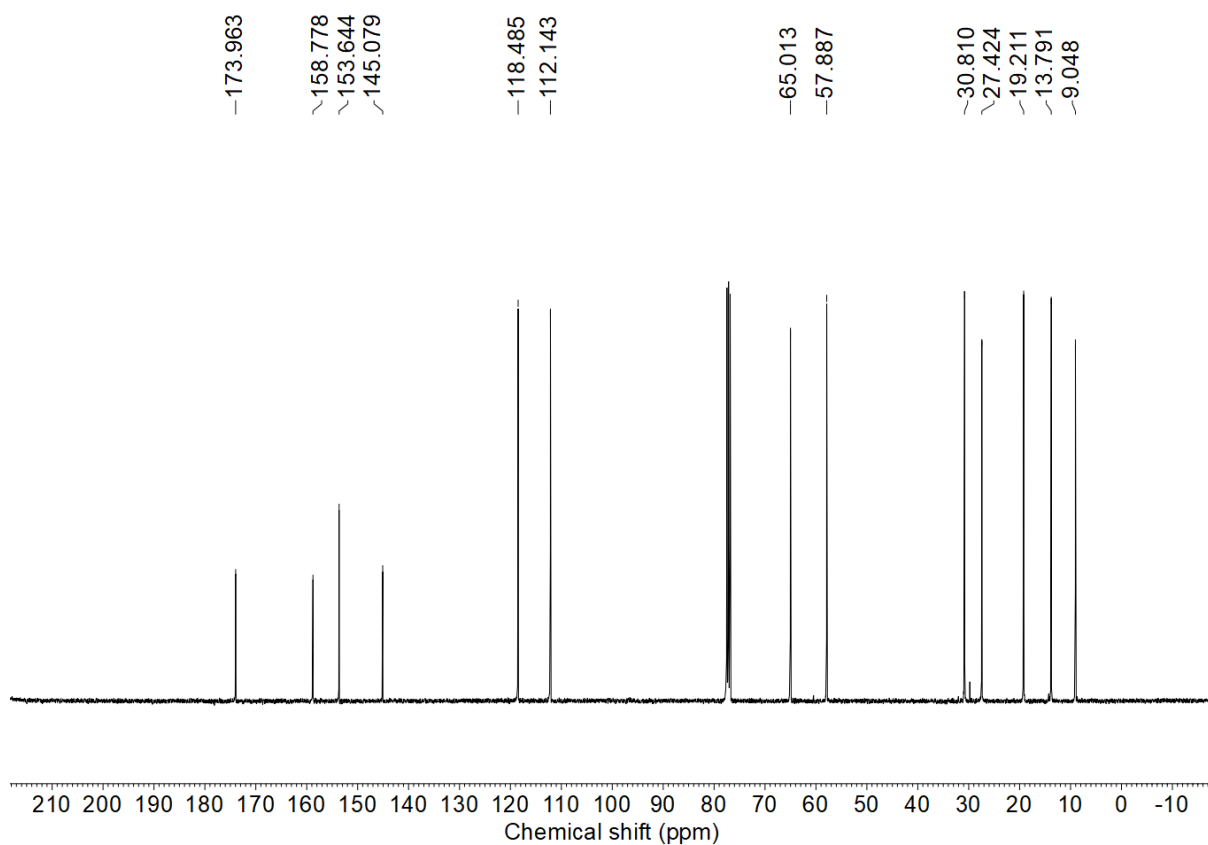

**Figure S39.** The  $^{13}\text{C}$ -NMR spectrum of **3b**.

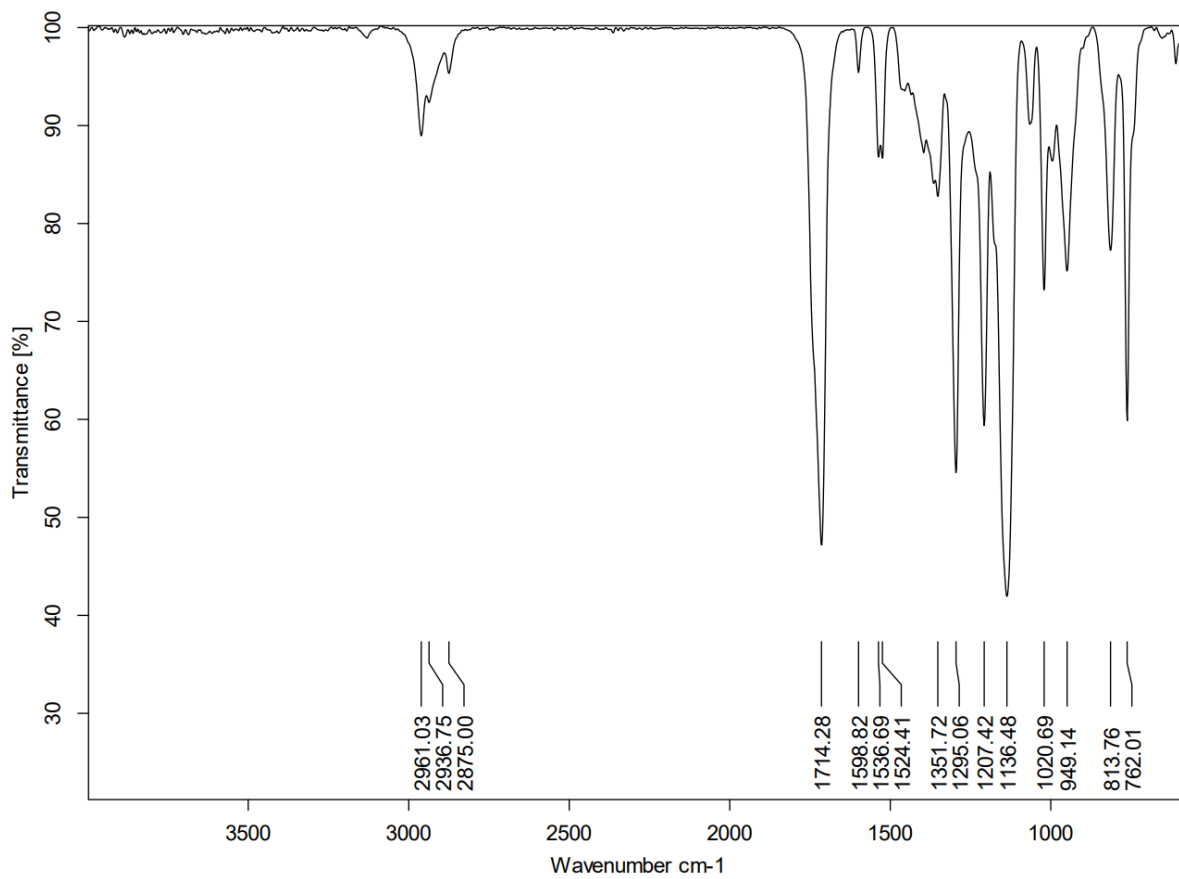

**Figure S40.** The FTIR spectrum of **3c**.

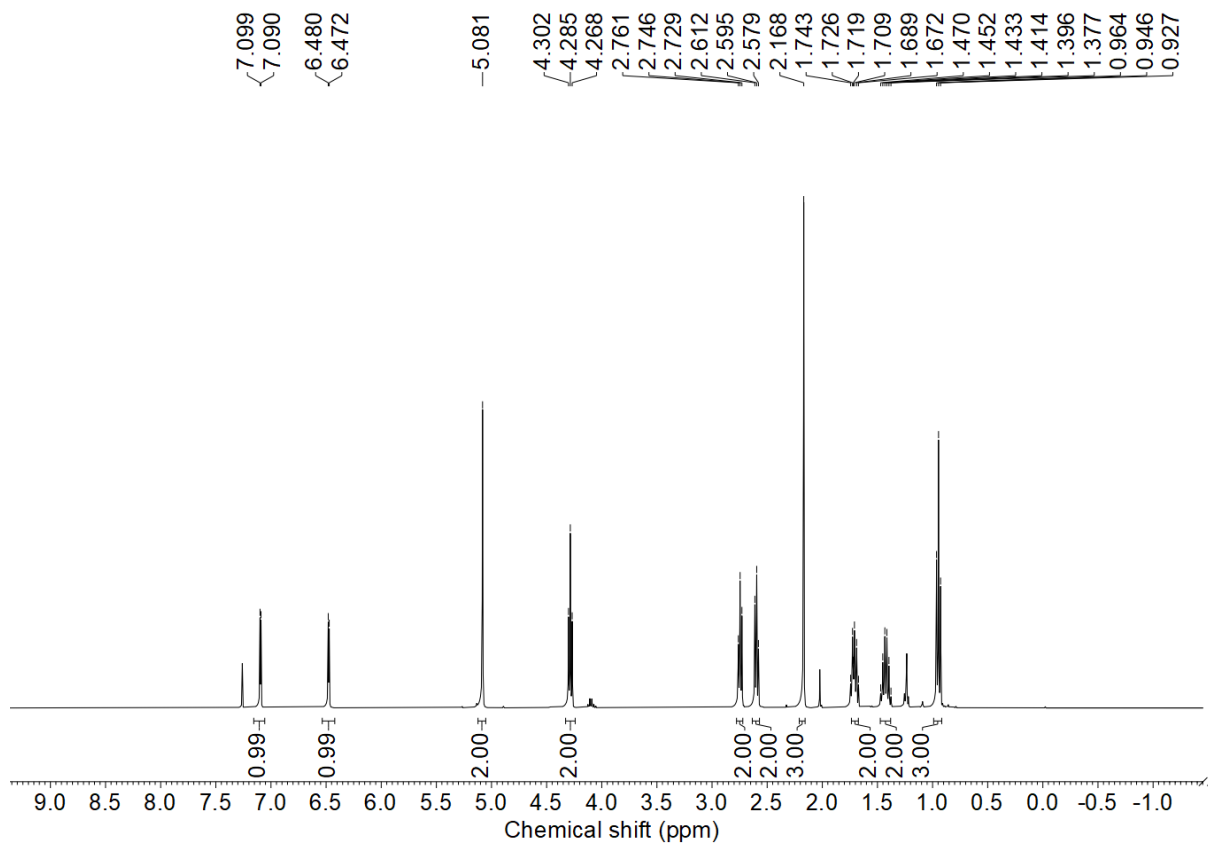

**Figure S41.** The  $^1\text{H}$ -NMR spectrum of **3c**.

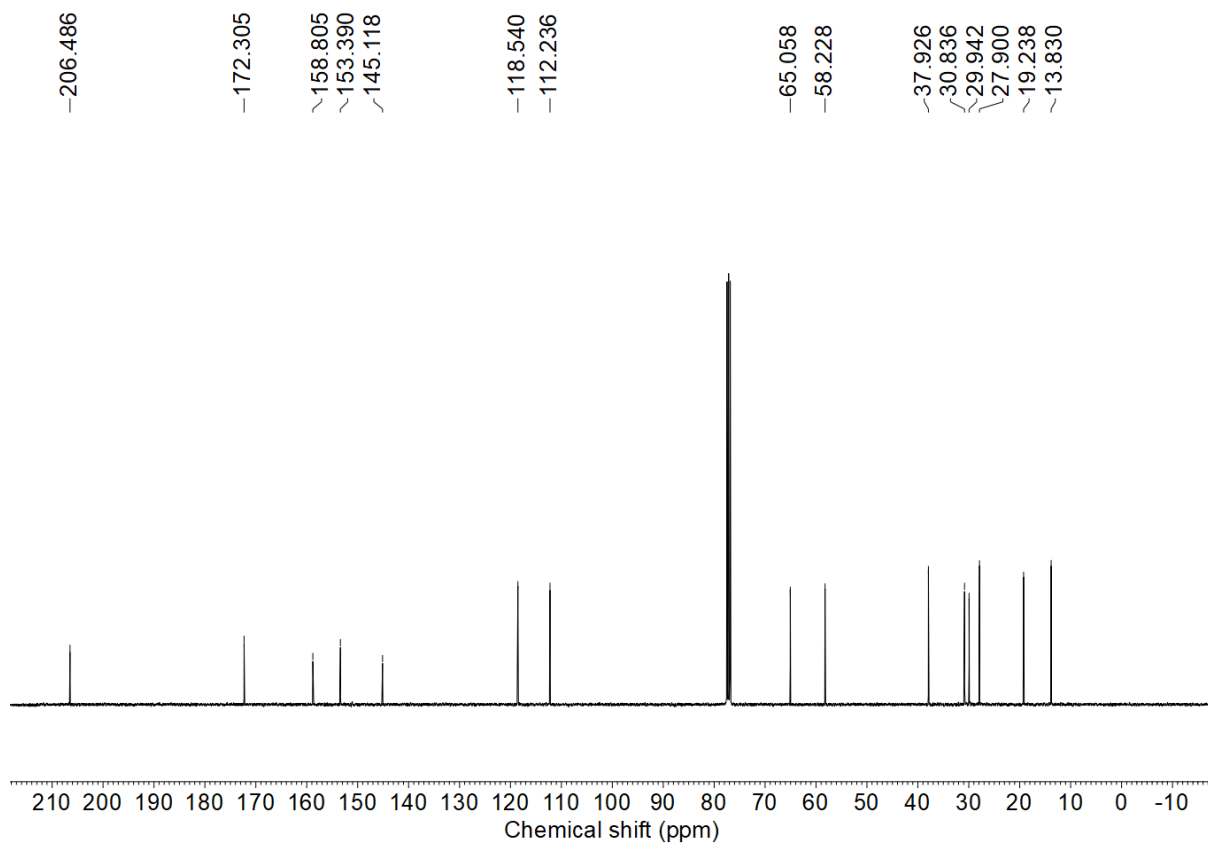

**Figure S42.** The  $^{13}\text{C}$ -NMR spectrum of **3c**.

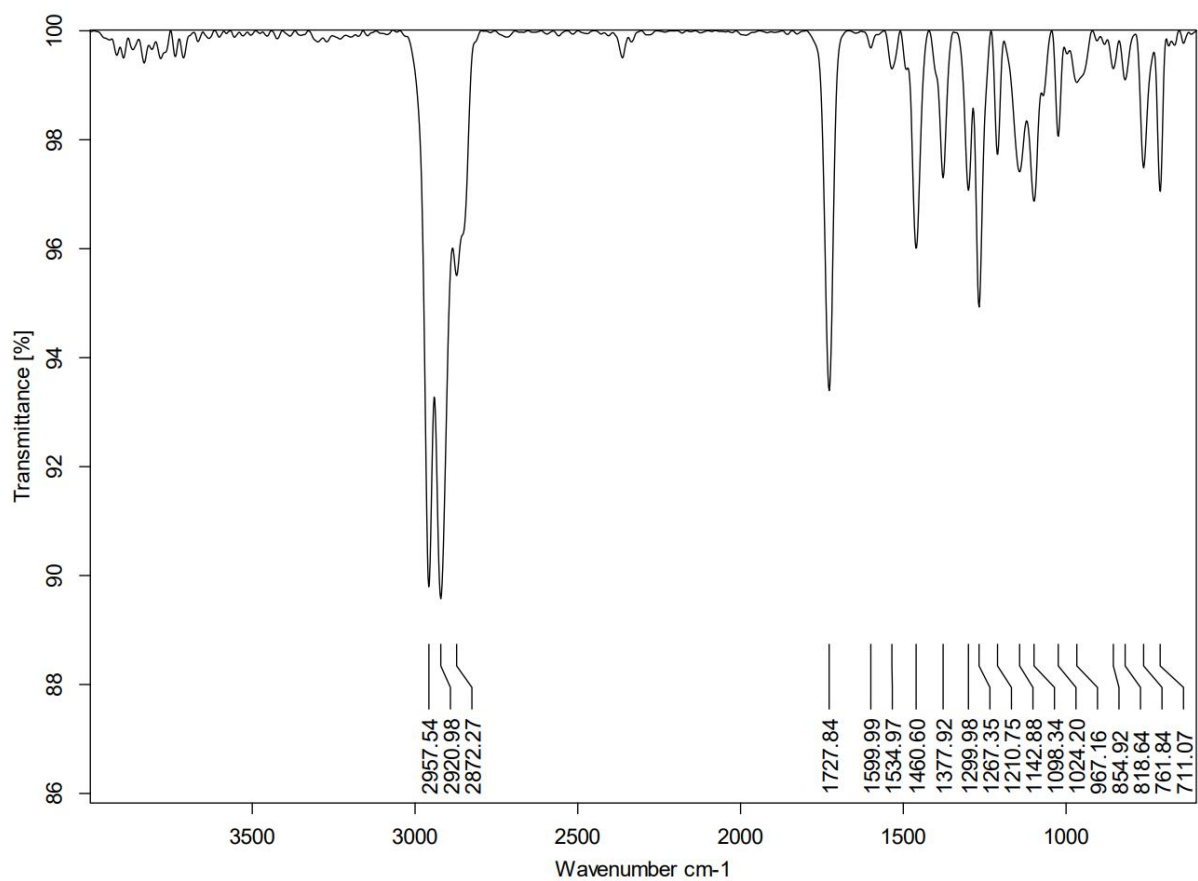

**Figure S43.** The FTIR spectrum of **3d**.

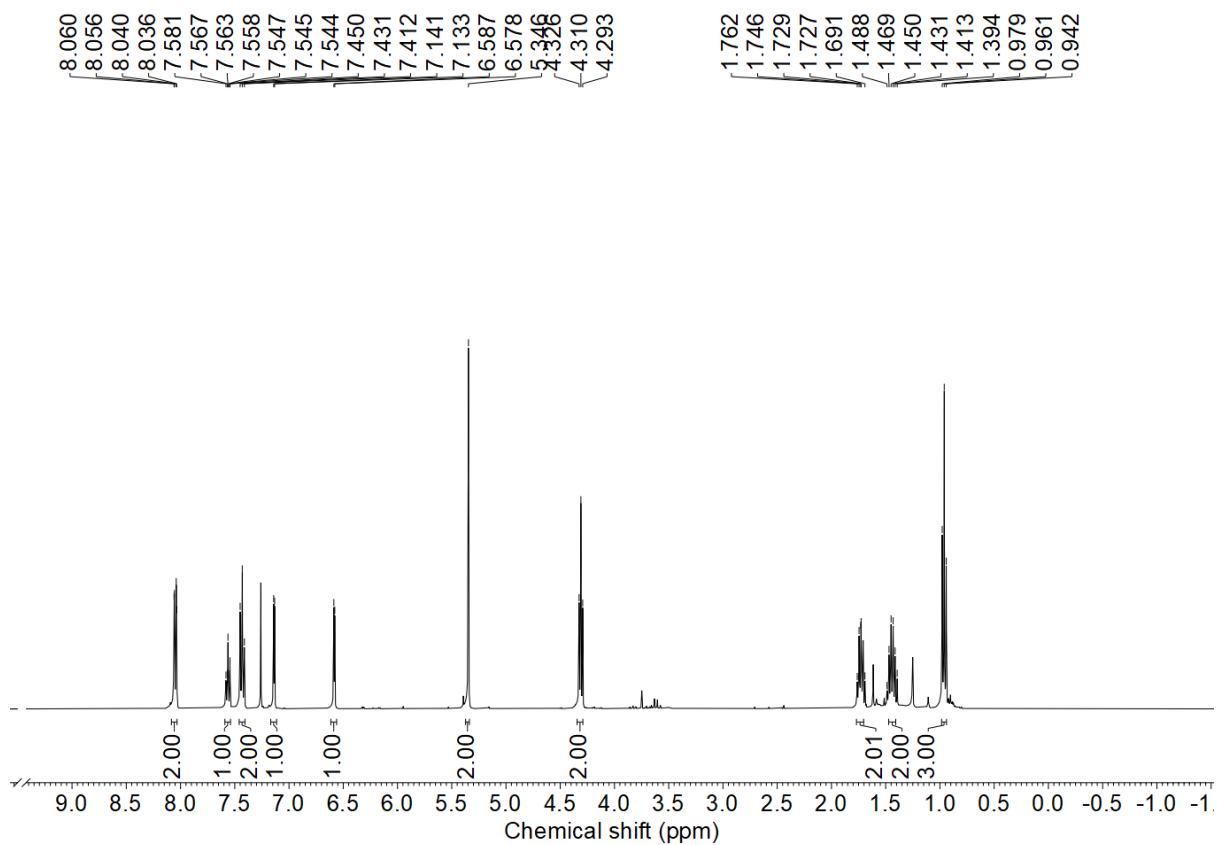

**Figure S44.** The <sup>1</sup>H-NMR spectrum of **3d**.

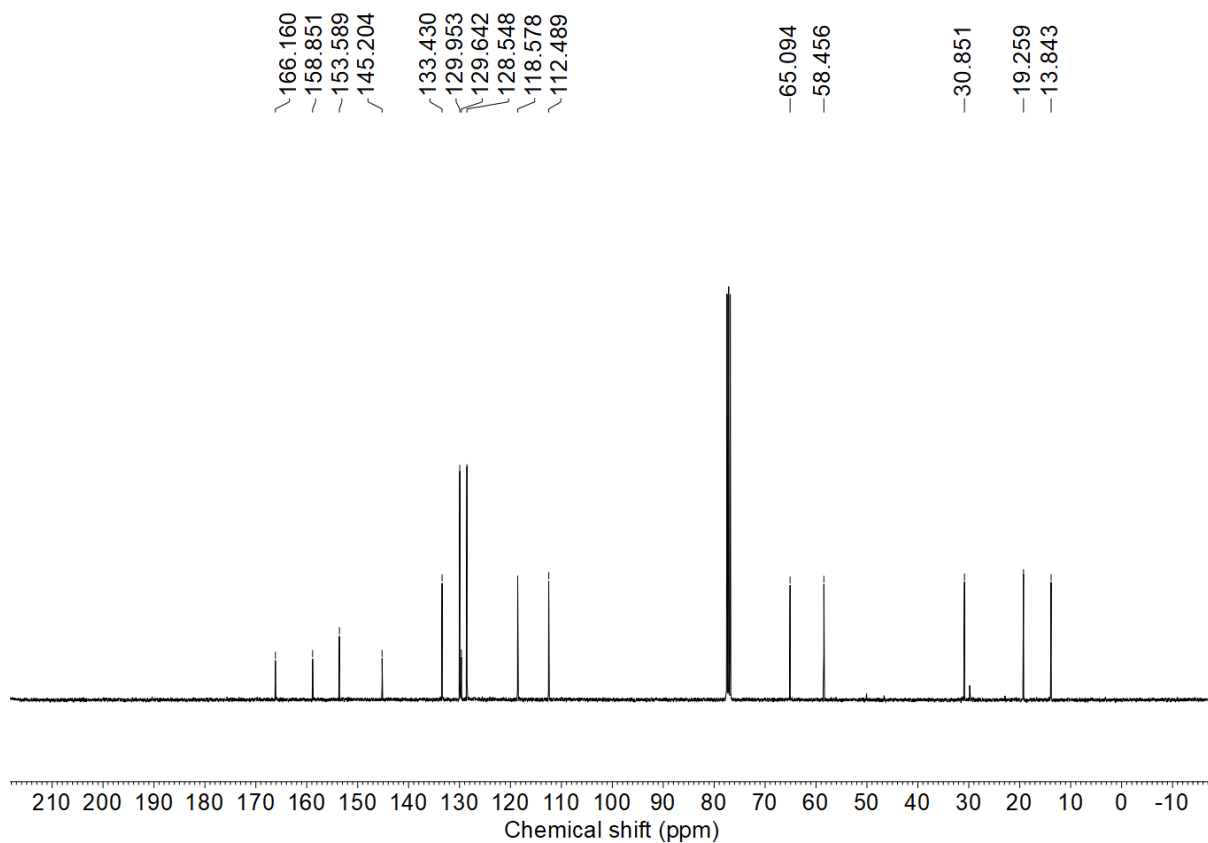

**Figure S45.** The  $^{13}\text{C}$ -NMR spectrum of **3d**.

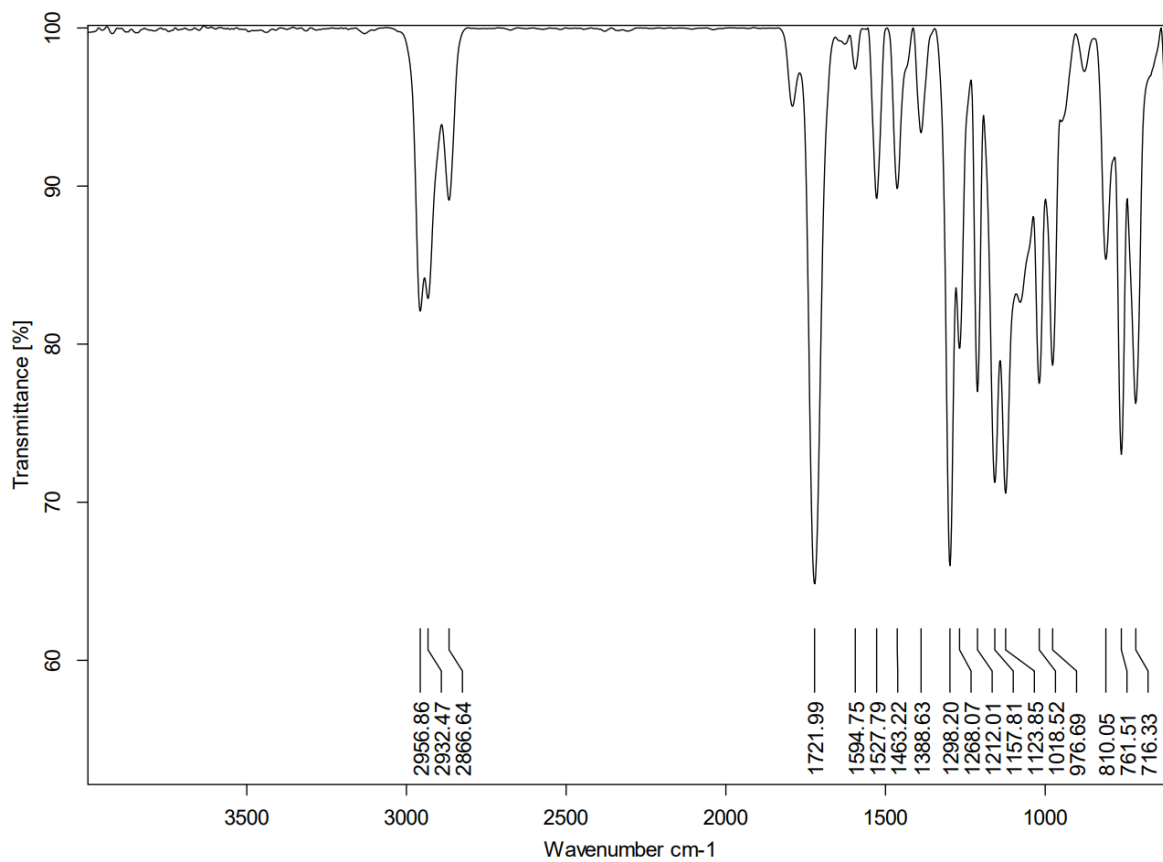

**Figure S46.** The FTIR spectrum of **4**.

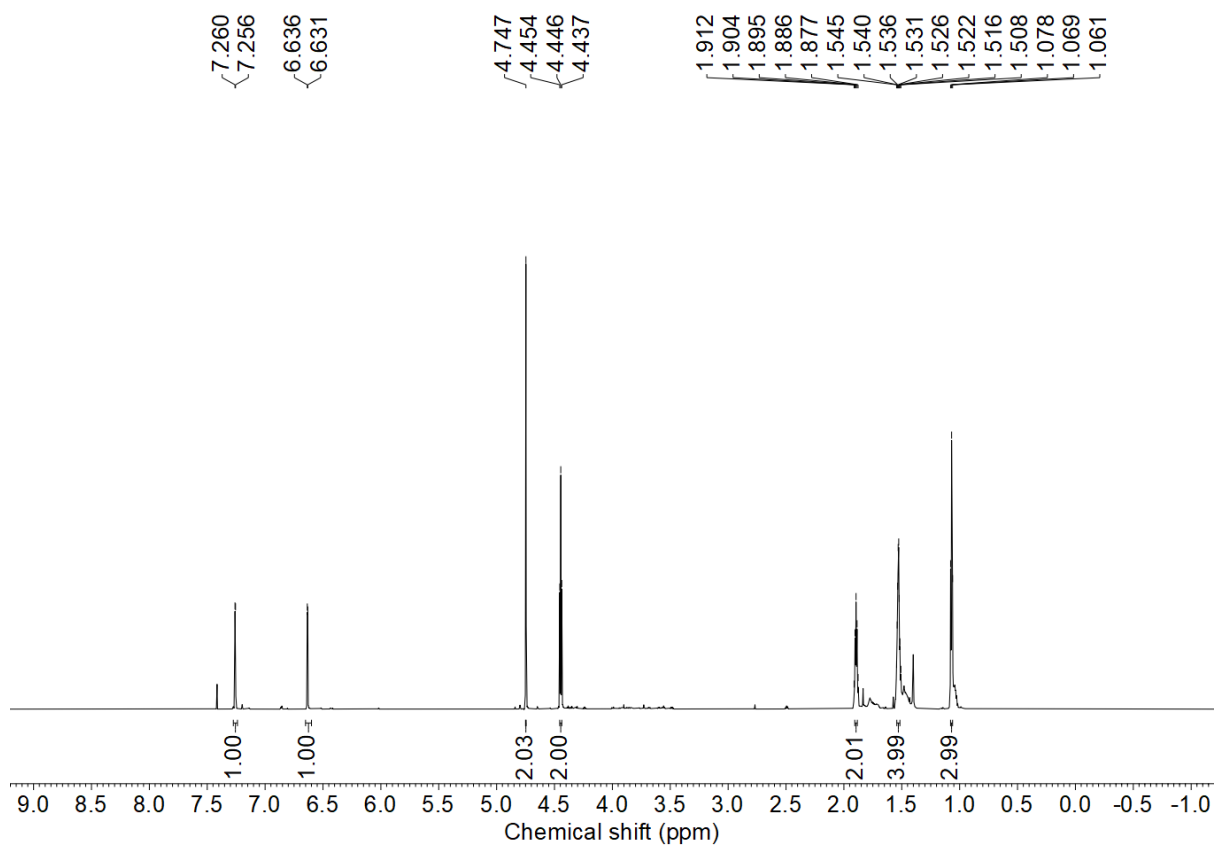

**Figure S47.** The  $^1\text{H}$ -NMR spectrum of **4**.

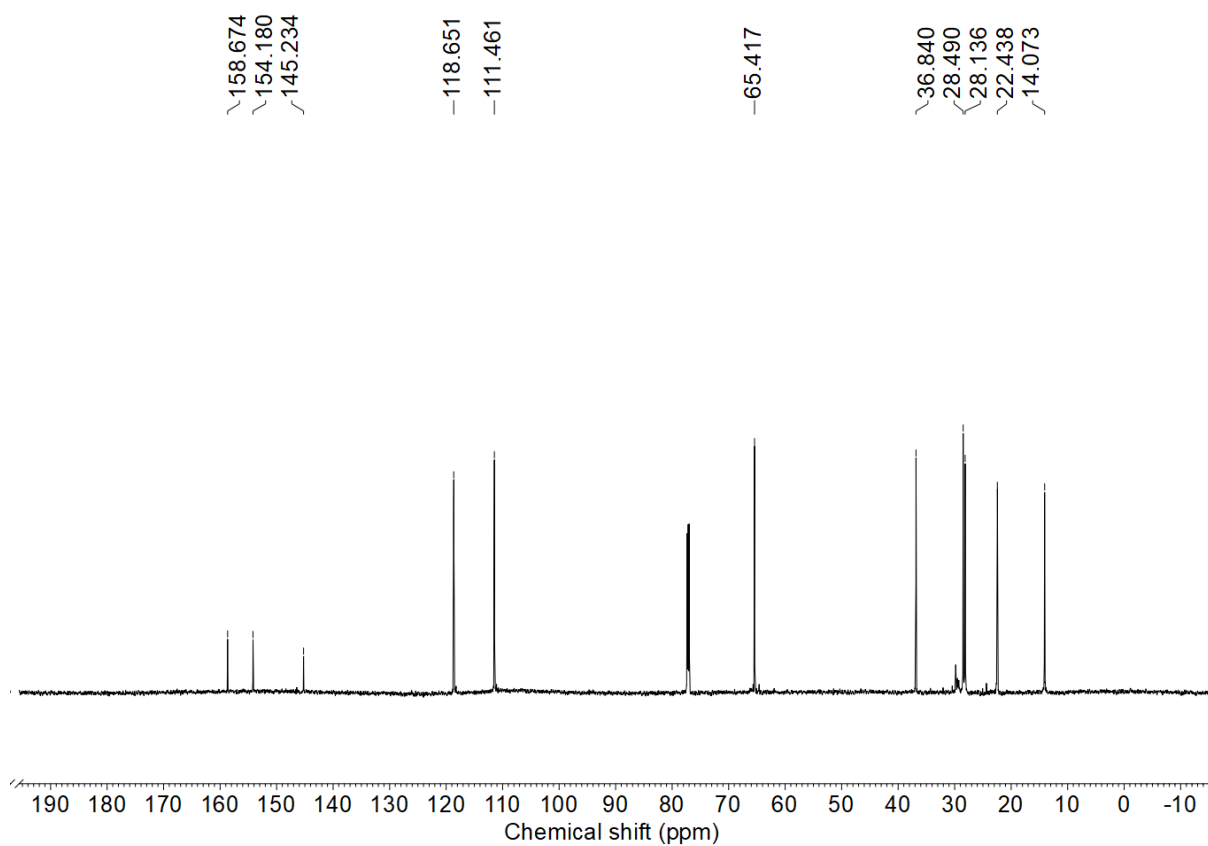

**Figure S48.** The  $^{13}\text{C}$ -NMR spectrum of **4**.

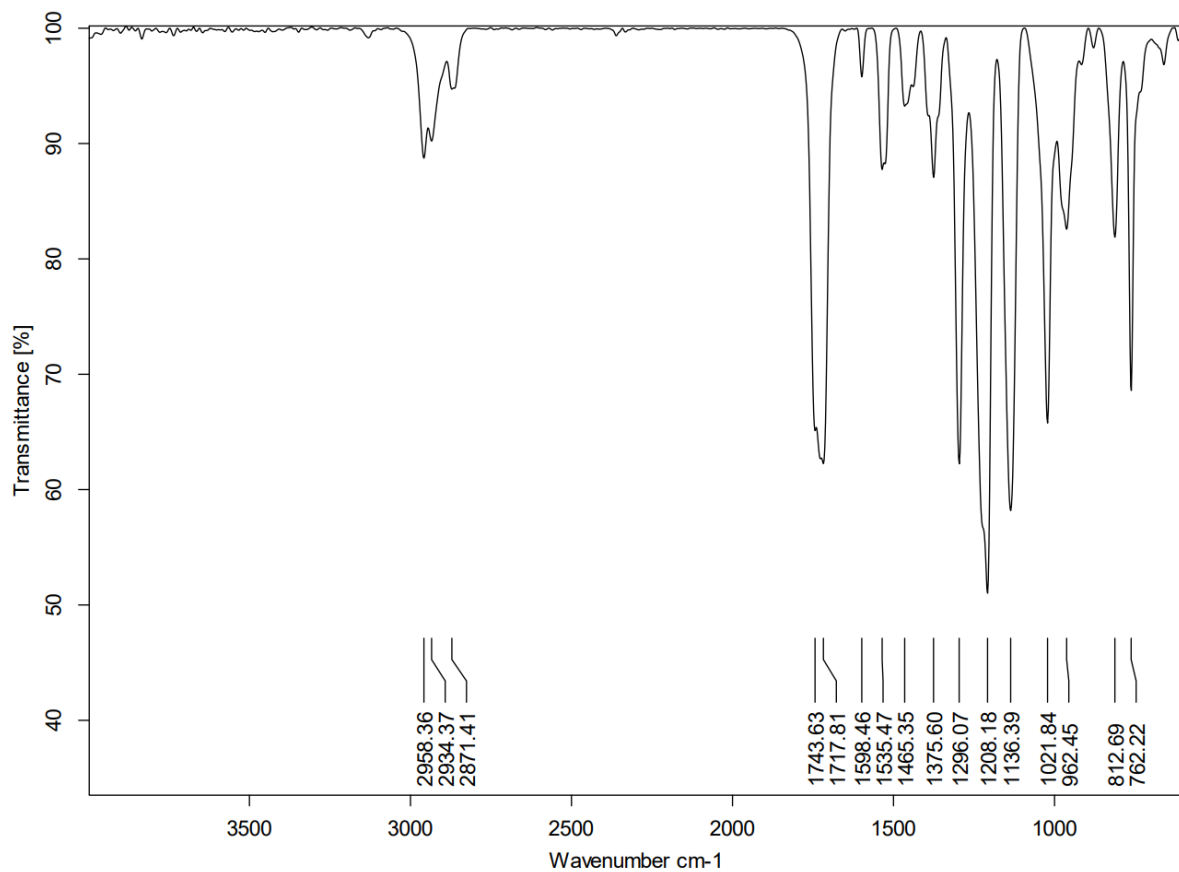

**Figure S49.** The FTIR spectrum of **4a**.

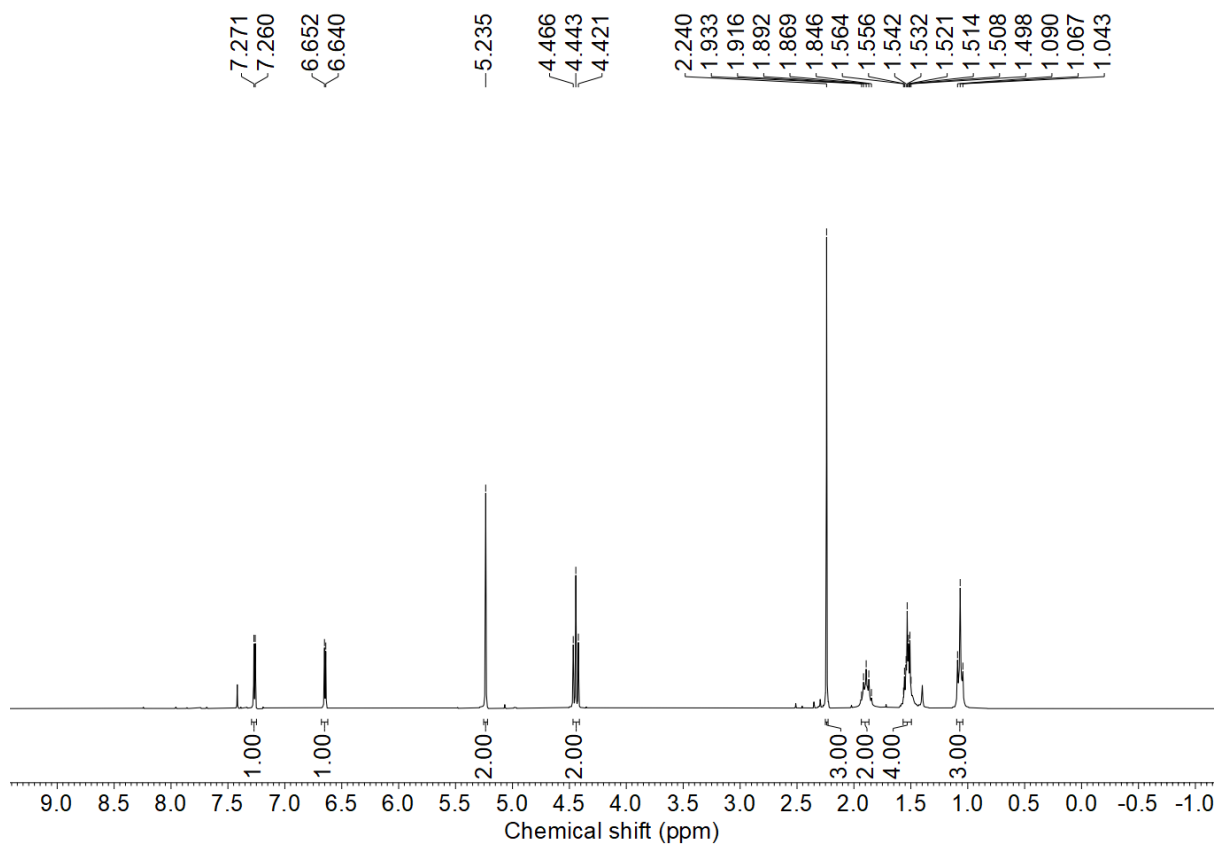

**Figure S50.** The <sup>1</sup>H-NMR spectrum of **4a**.

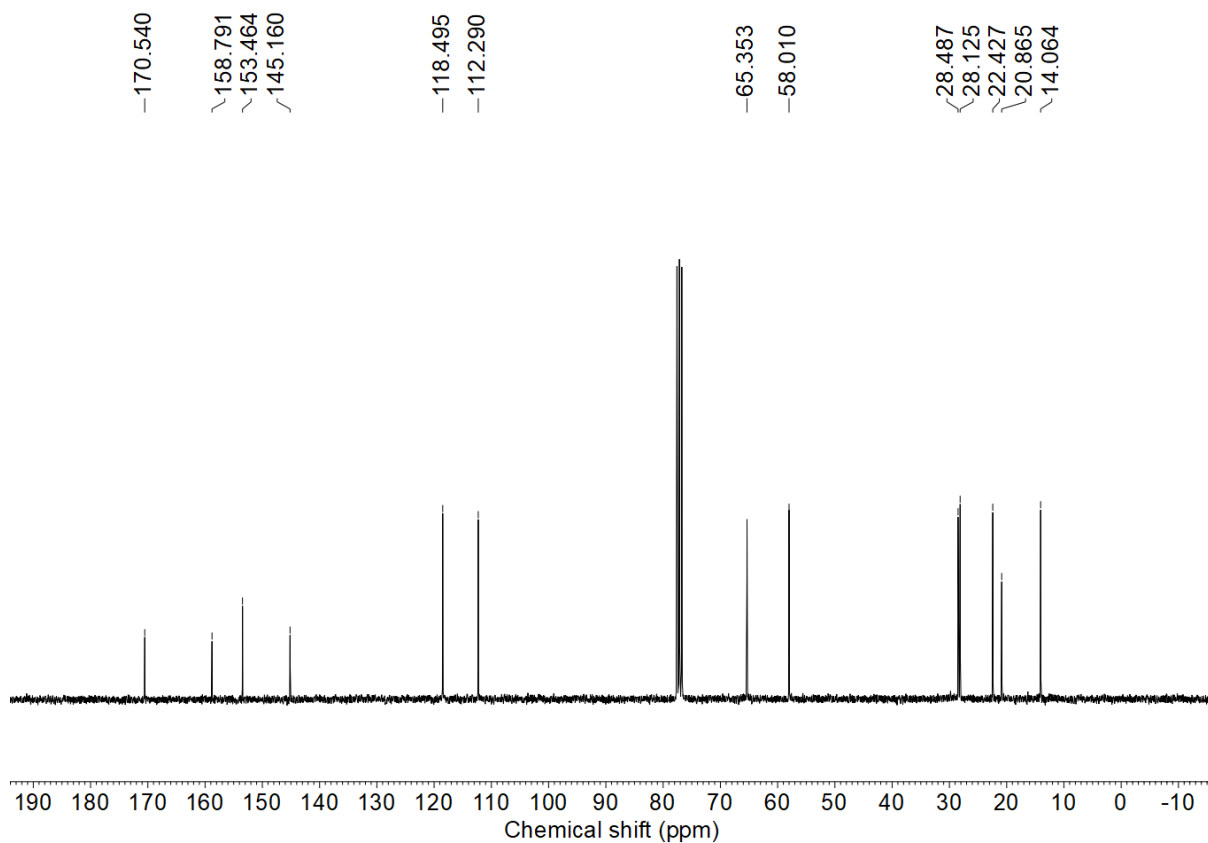

**Figure S51.** The  $^{13}\text{C}$ -NMR spectrum of **4a**.

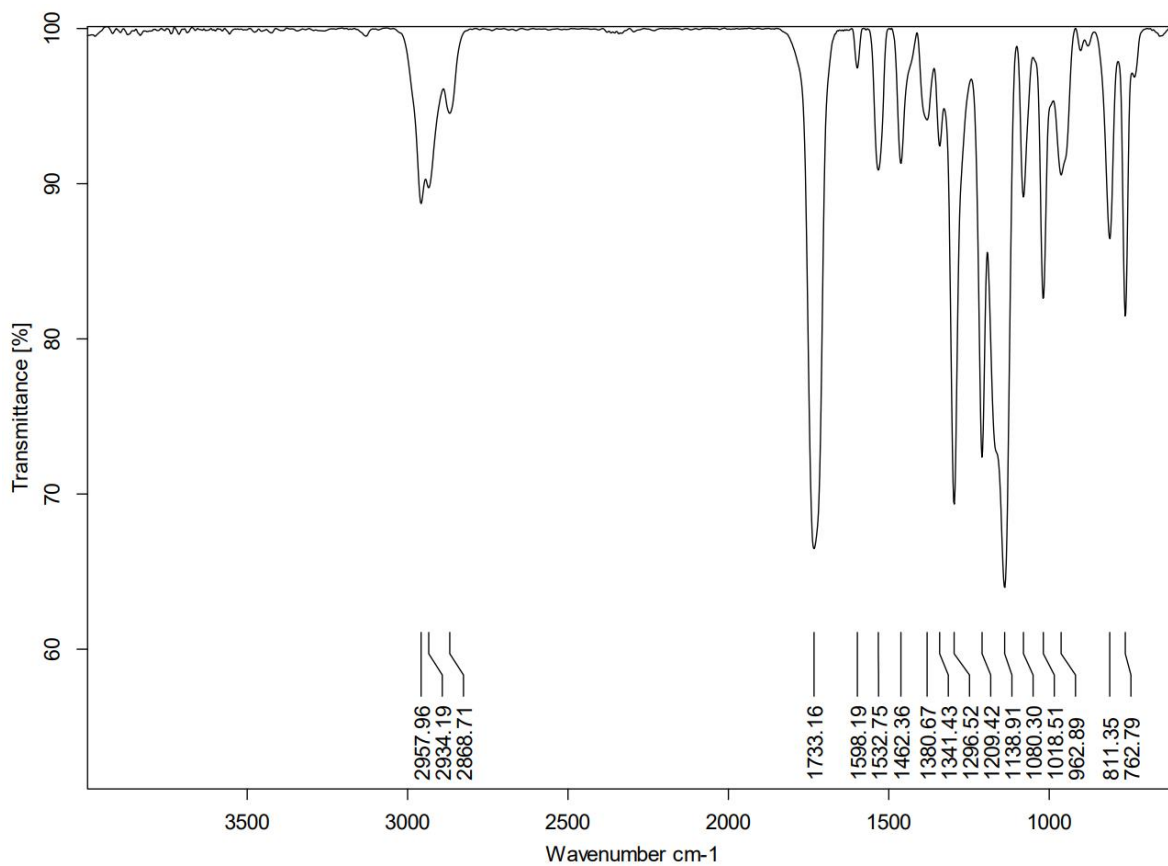

**Figure S52.** The FTIR spectrum of **4b**.

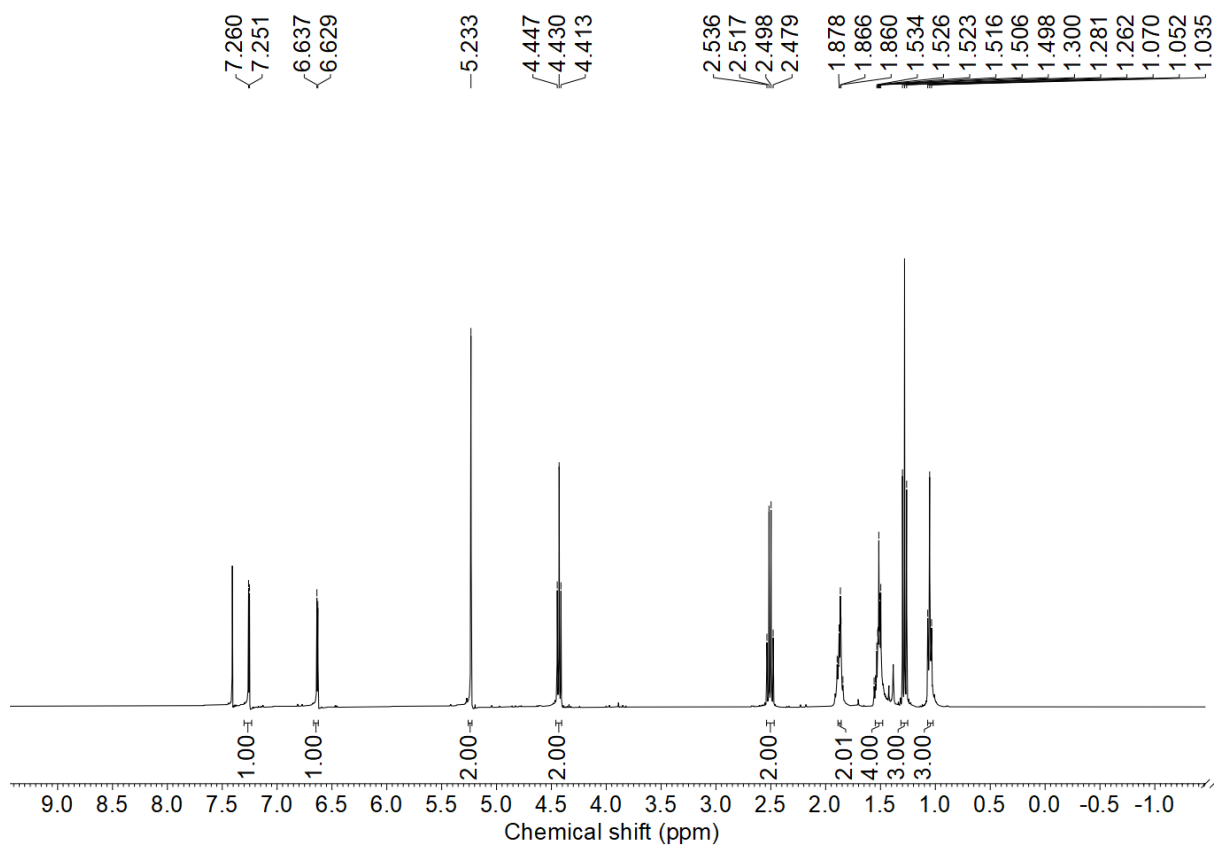

**Figure S53.** The  $^1\text{H}$ -NMR spectrum of **4b**.

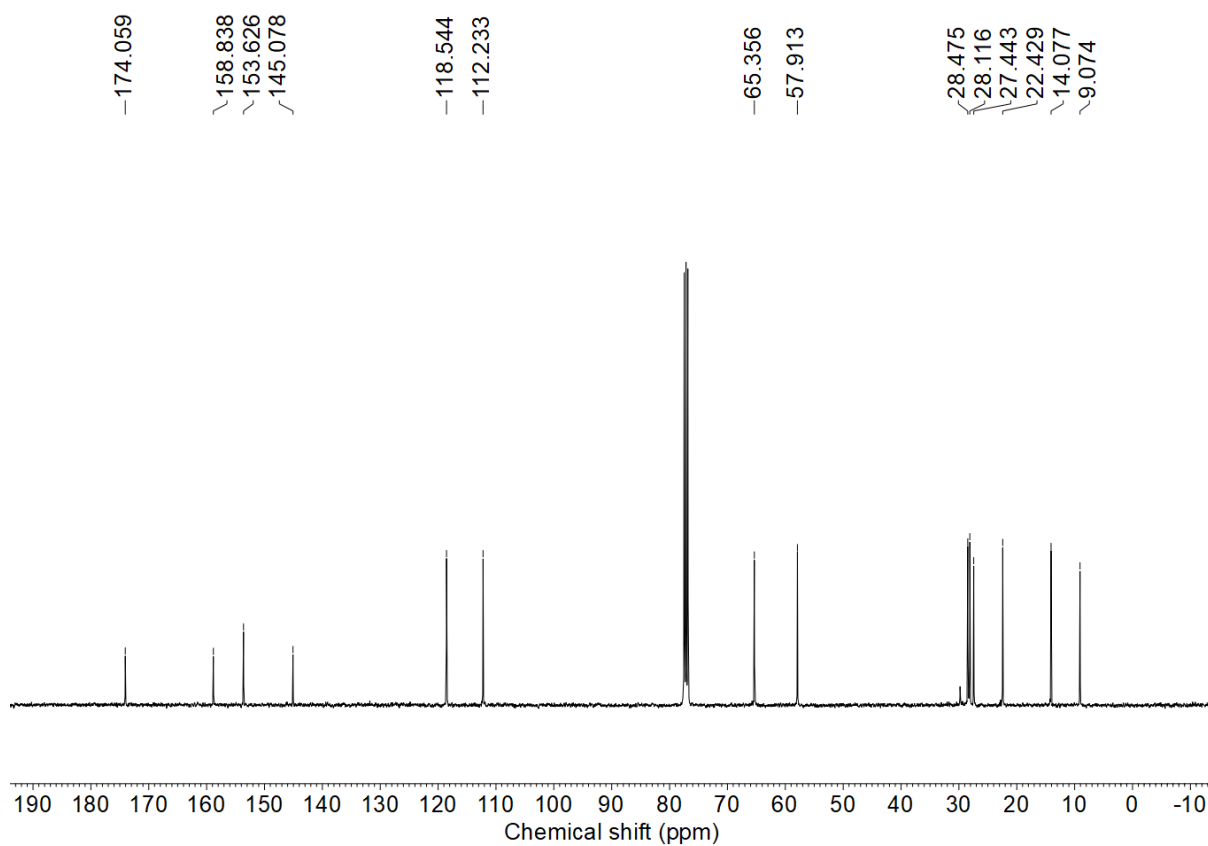

**Figure S54.** The  $^{13}\text{C}$ -NMR spectrum of **4b**.



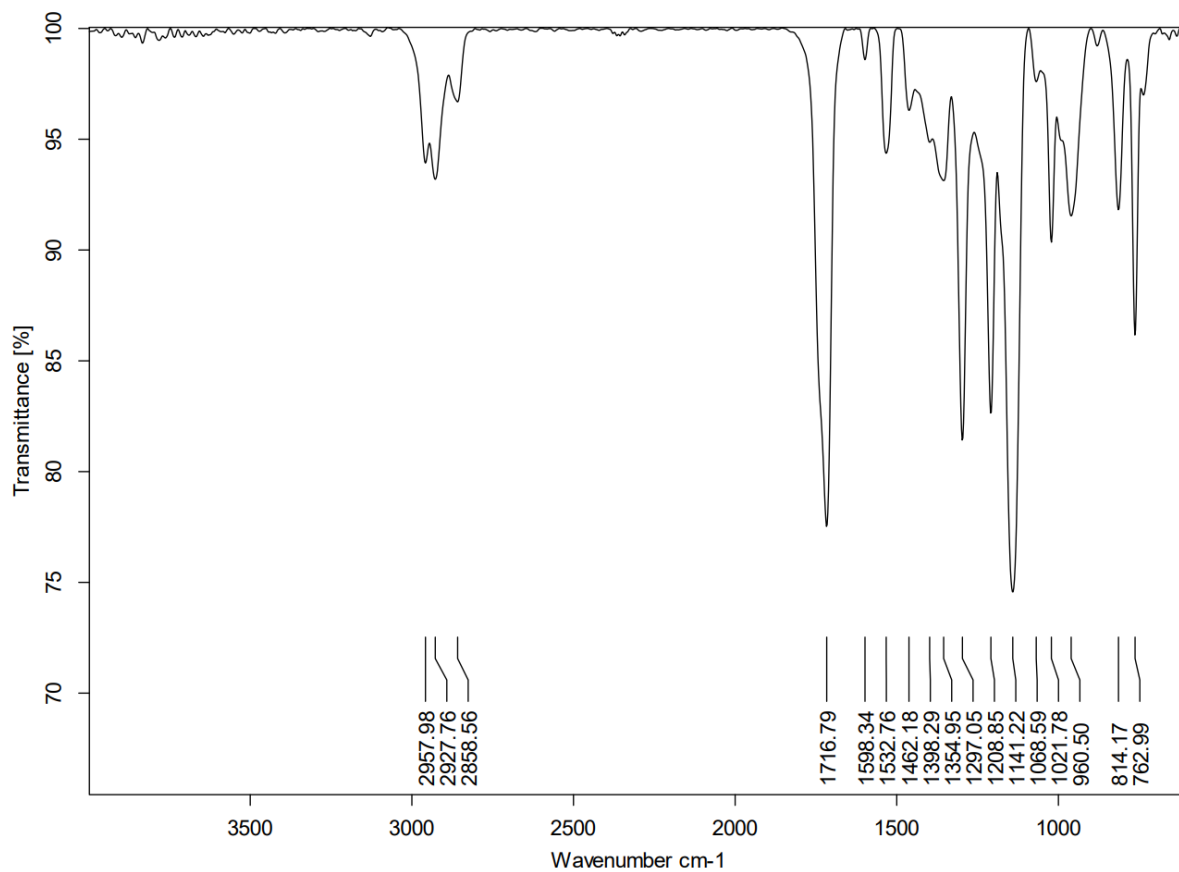

**Figure S55.** The FTIR spectrum of **4c**.

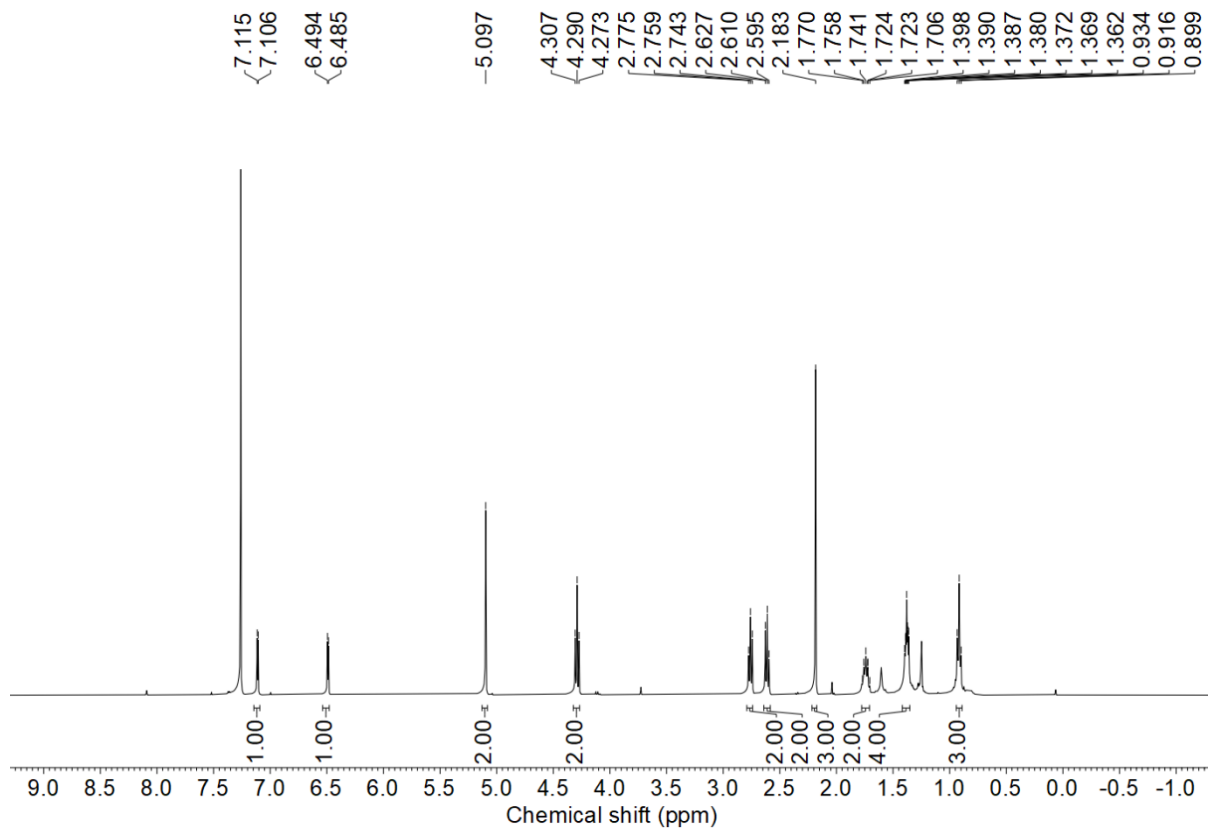

**Figure S56.** The <sup>1</sup>H-NMR spectrum of **4c**.

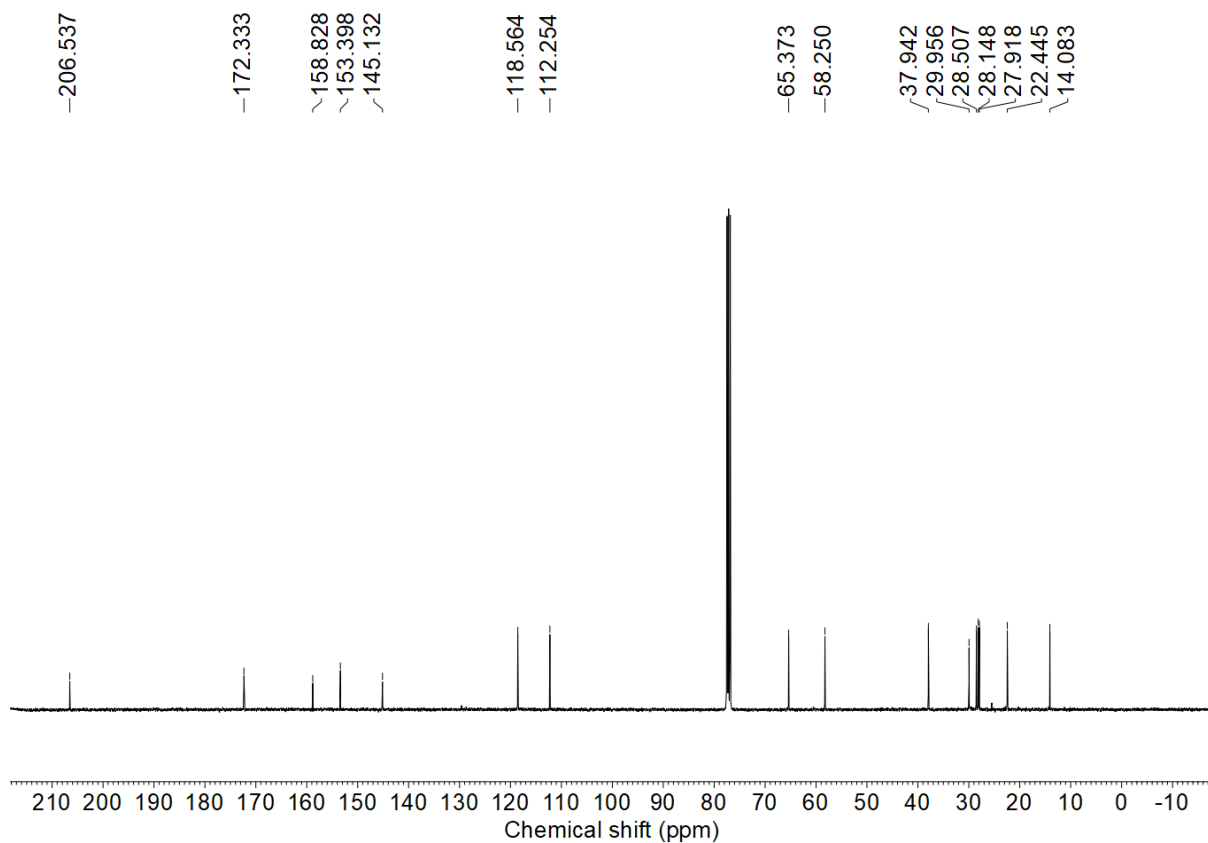

**Figure S57.** The  $^{13}\text{C}$ -NMR spectrum of **4c**.

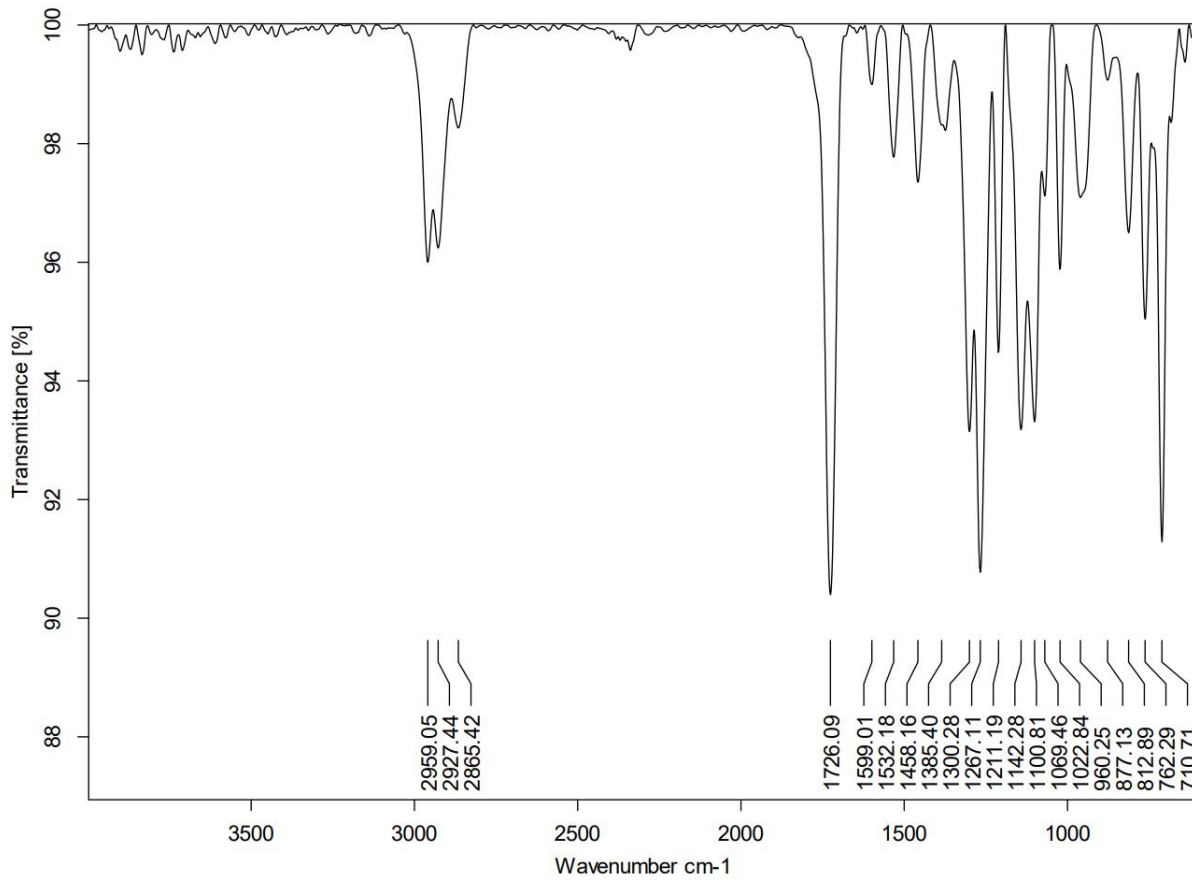

**Figure S58.** The FTIR spectrum of **4d**.

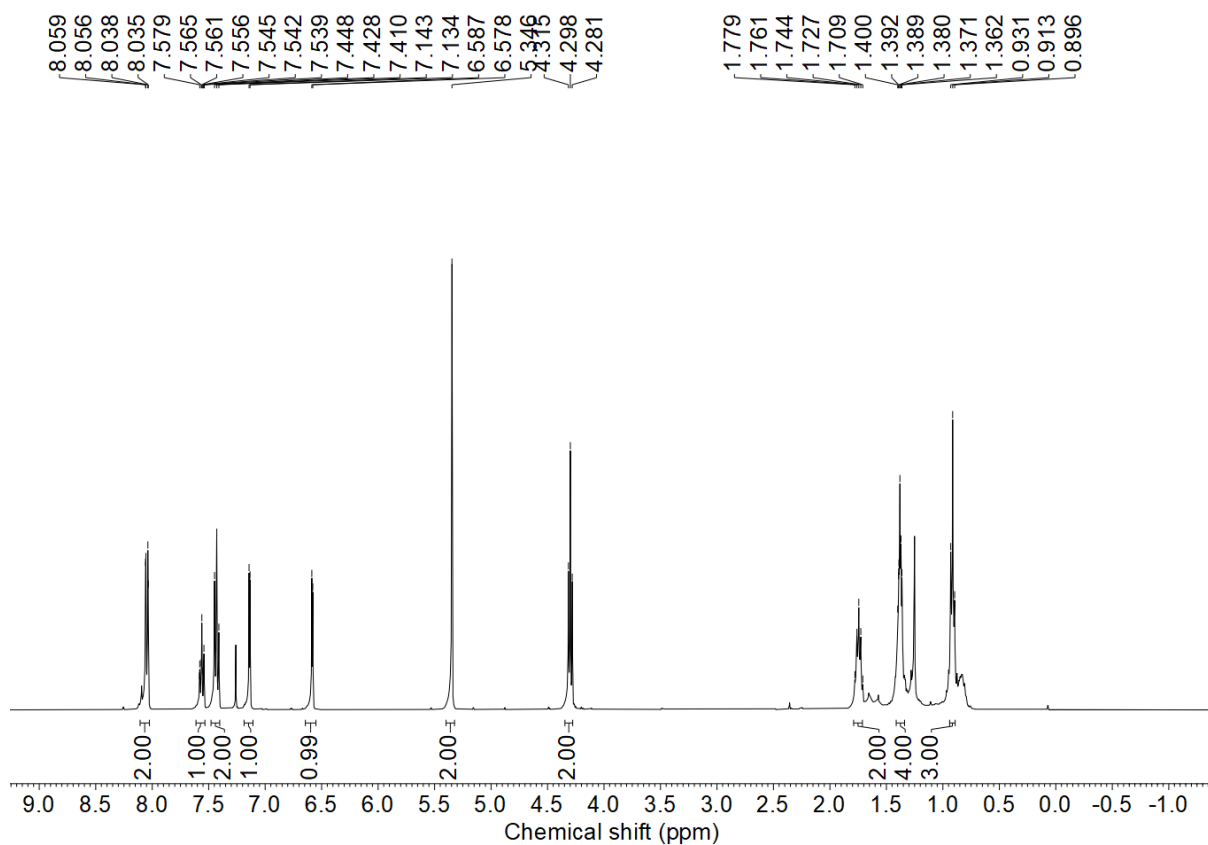

**Figure S59.** The  $^1\text{H}$ -NMR spectrum of **4d**.

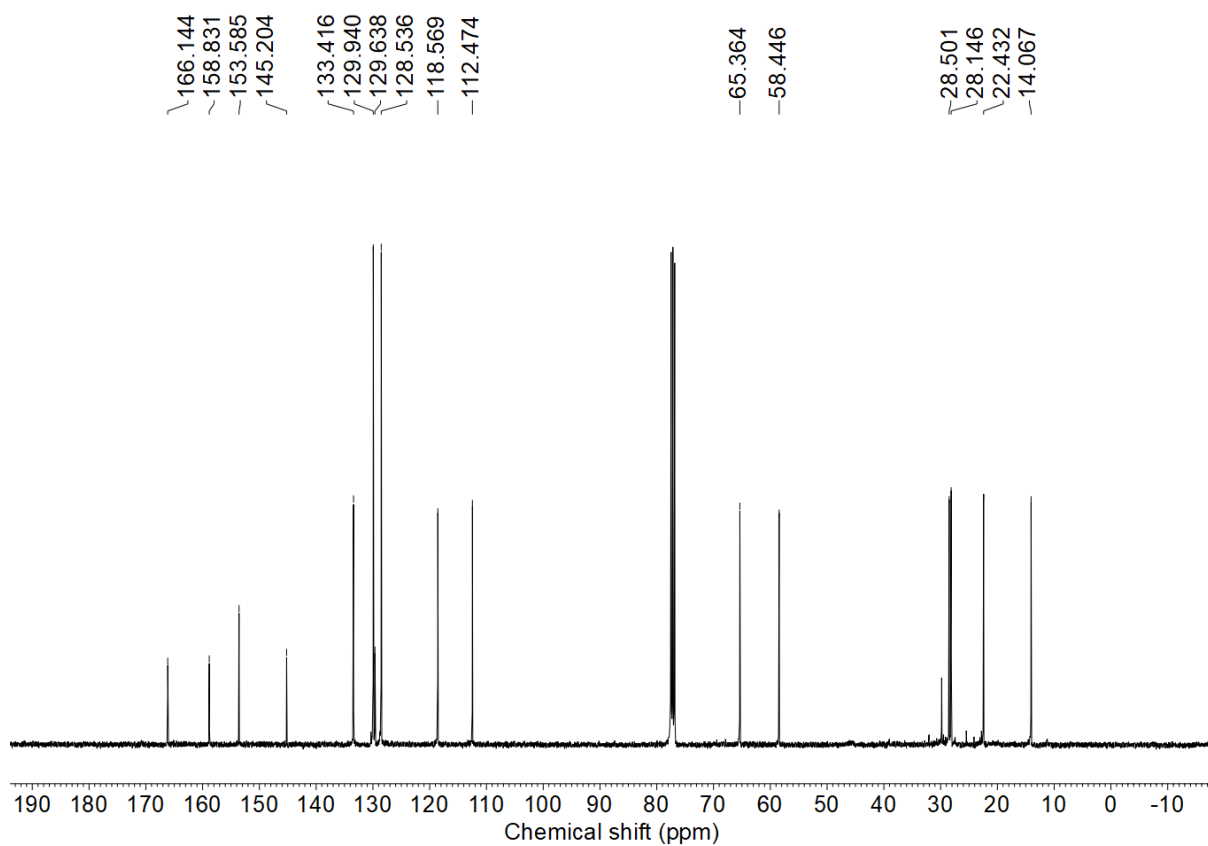

**Figure S60.** The  $^{13}\text{C}$ -NMR spectrum of **4d**.

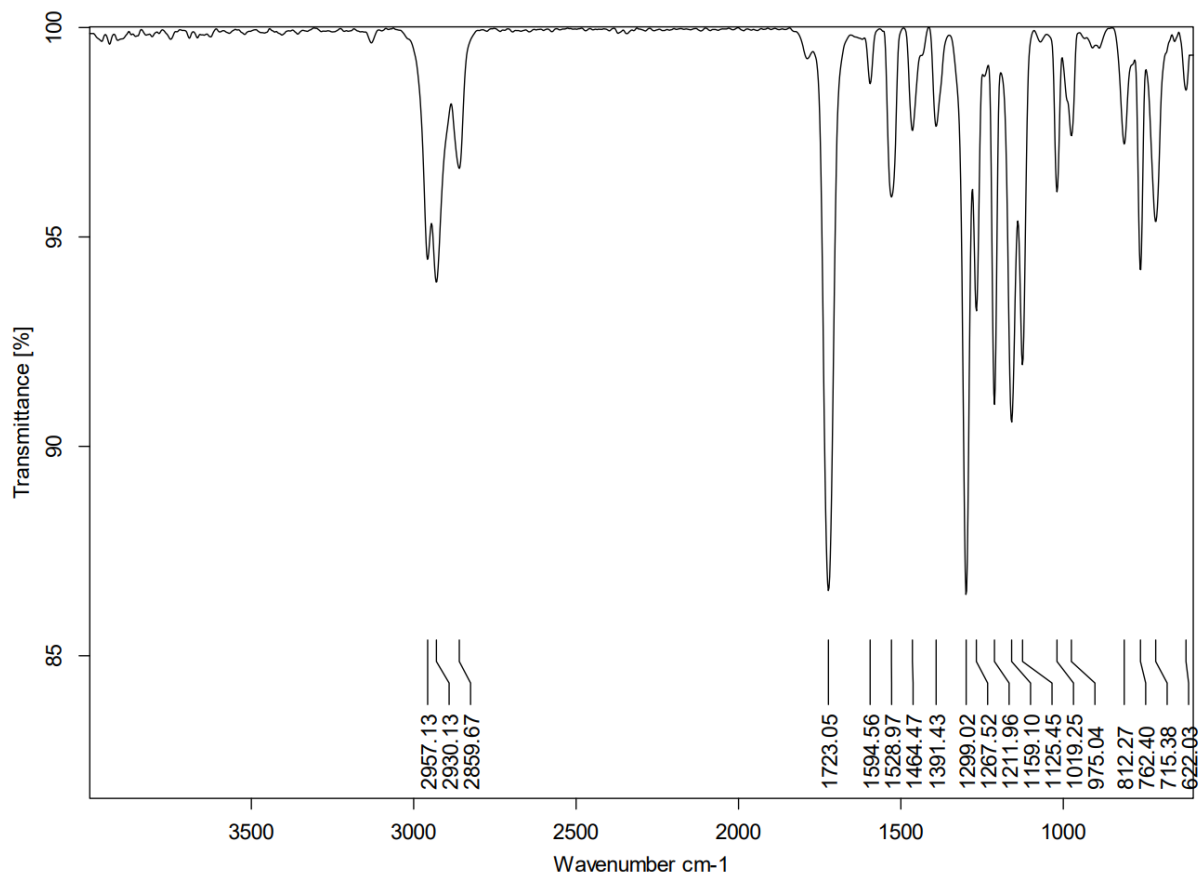

**Figure S61.** The FTIR spectrum of **5**.

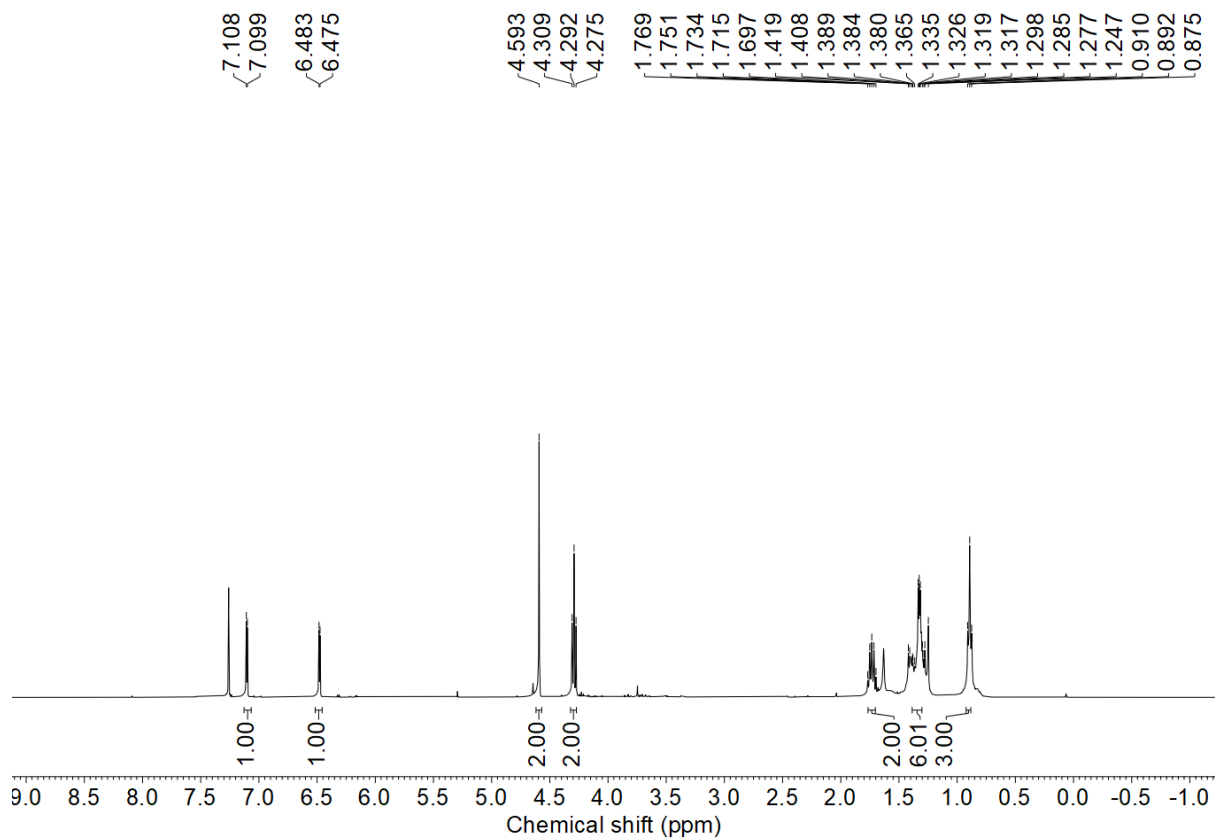

**Figure S62.** The <sup>1</sup>H-NMR spectrum of **5**.

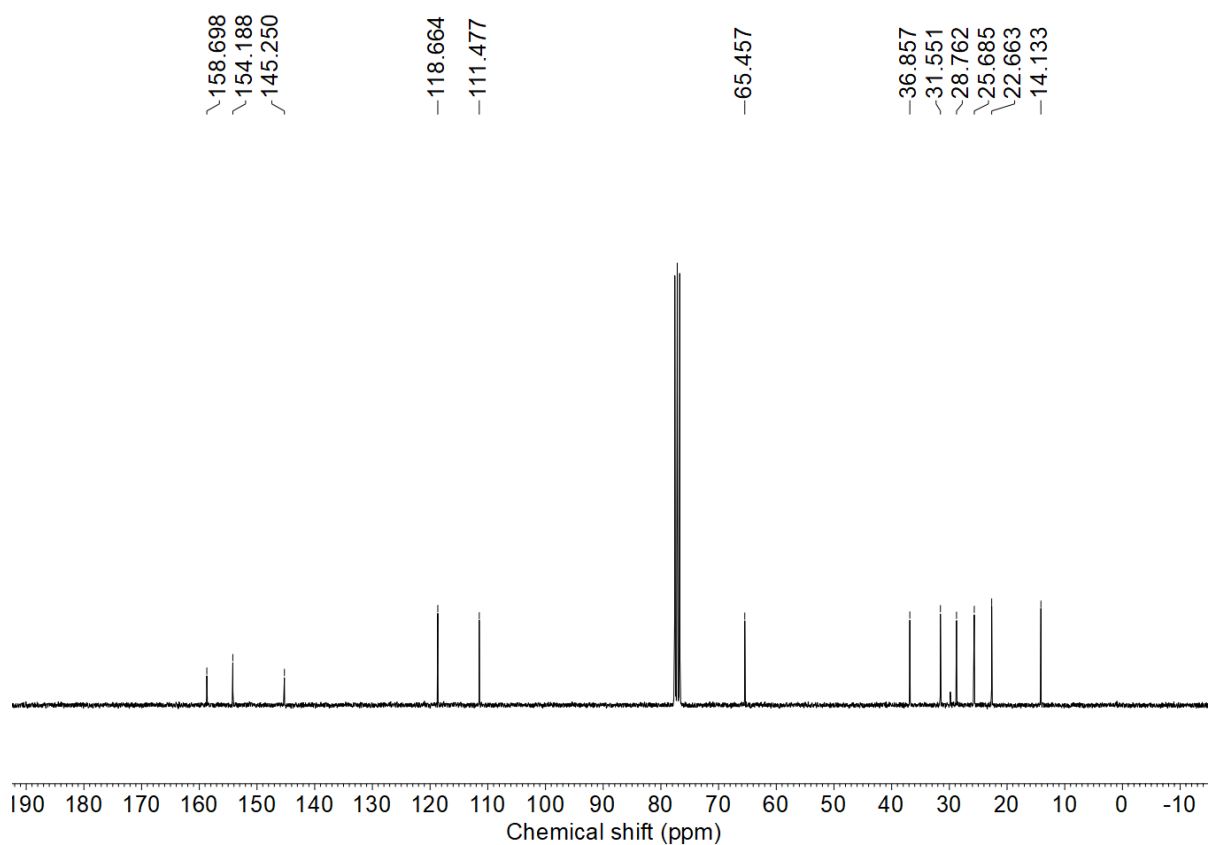

**Figure S63.** The  $^{13}\text{C}$ -NMR spectrum of **5**.

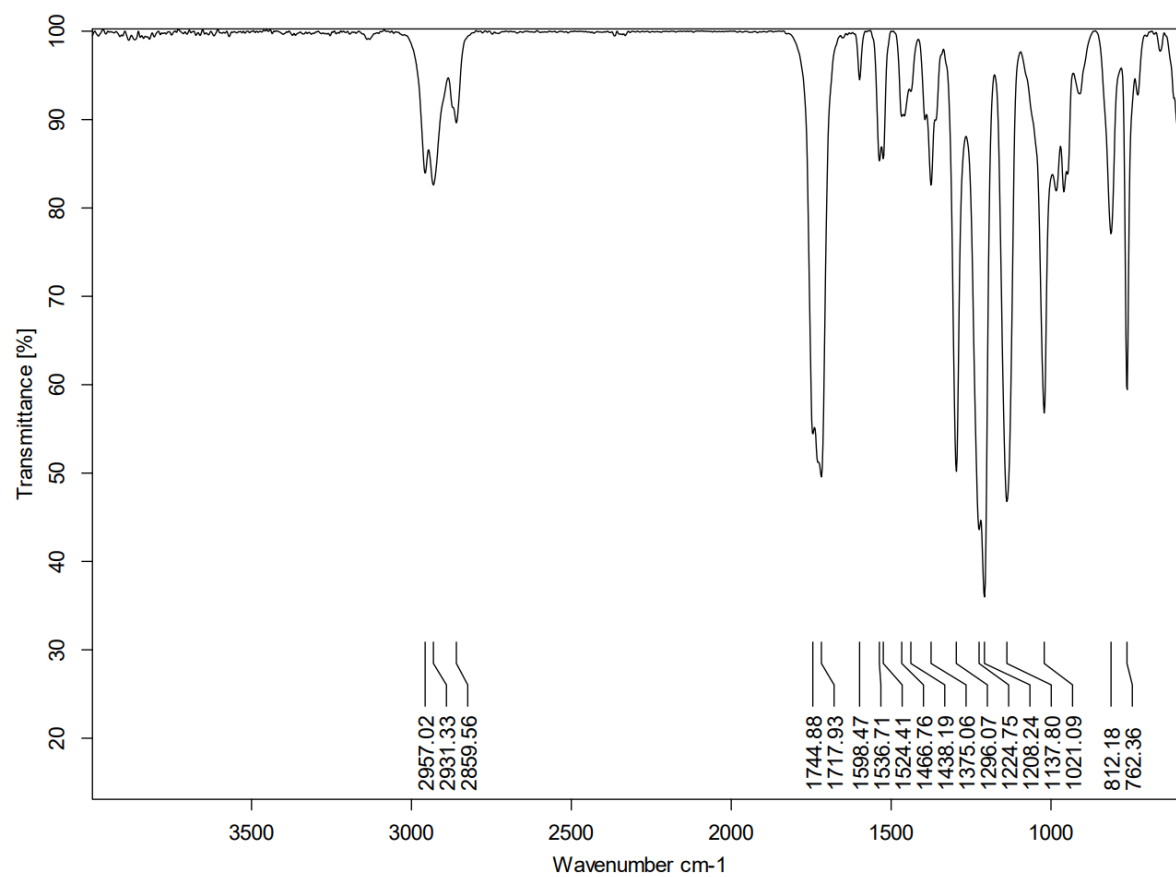

**Figure S64.** The FTIR spectrum of **5a**.

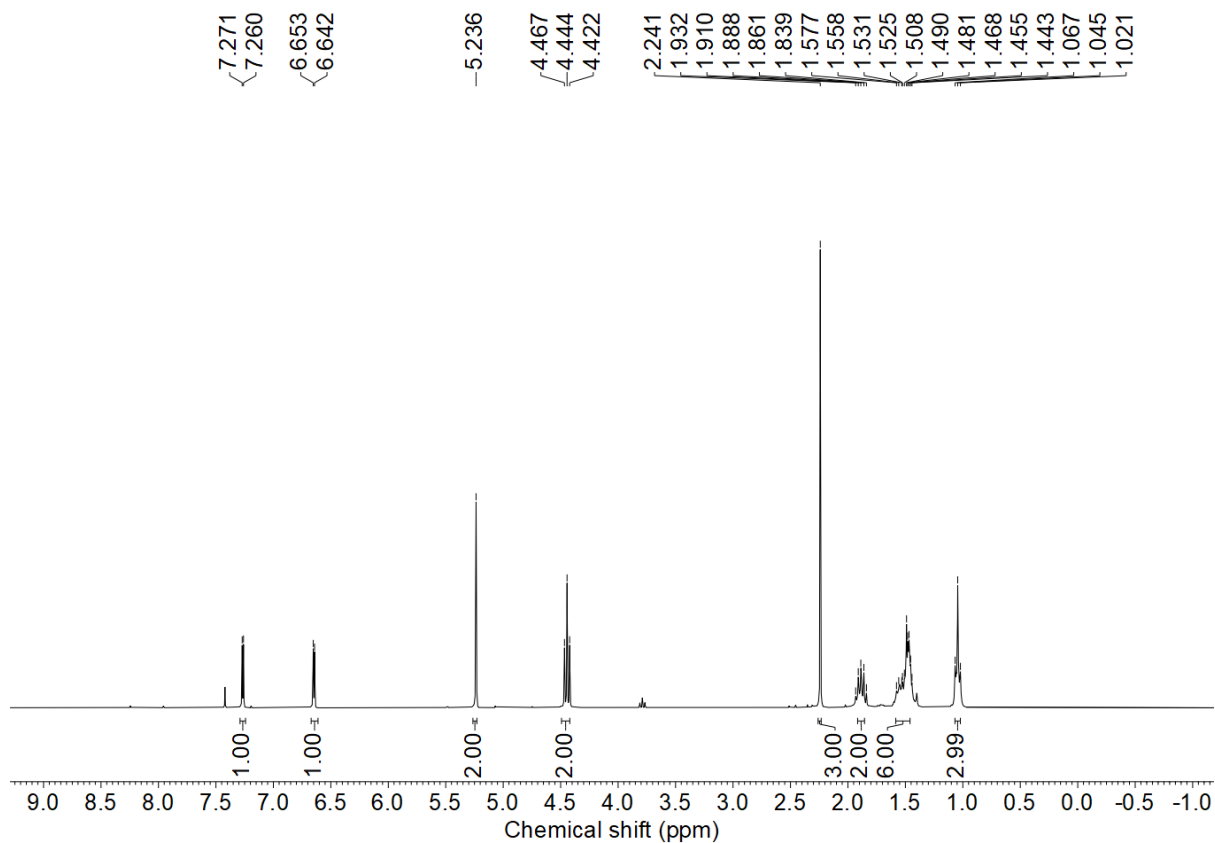

**Figure S65.** The  $^1\text{H-NMR}$  spectrum of **5a**.

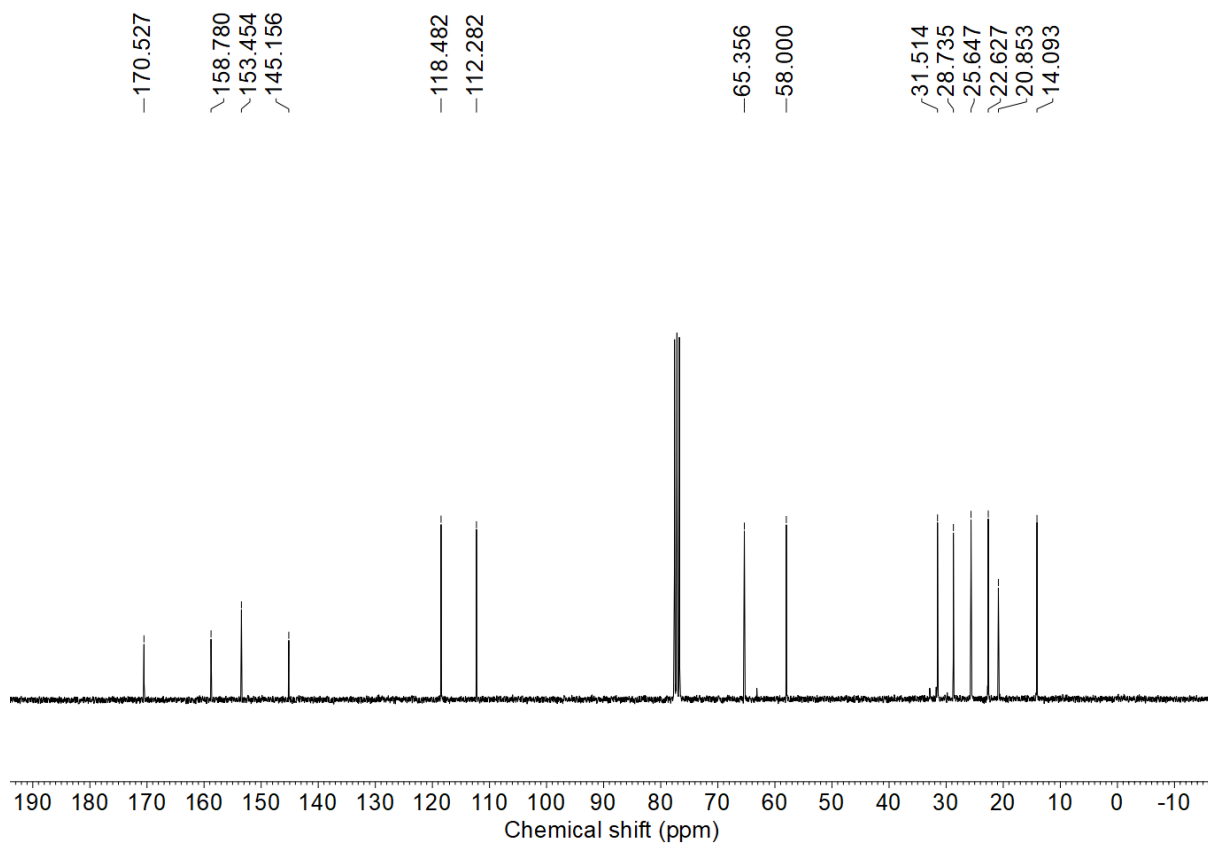

**Figure S66.** The  $^{13}\text{C-NMR}$  spectrum of **5a**.

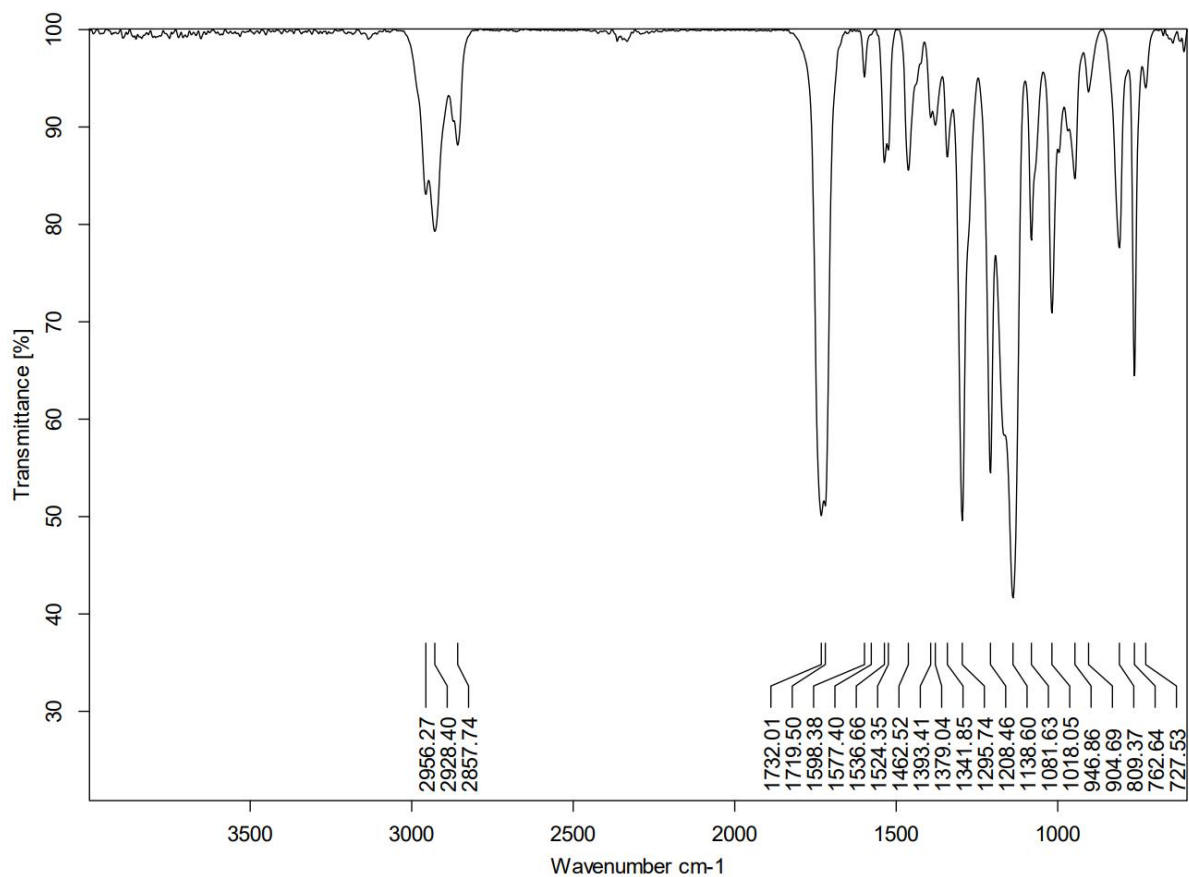

**Figure S67.** The FTIR spectrum of **5b**.

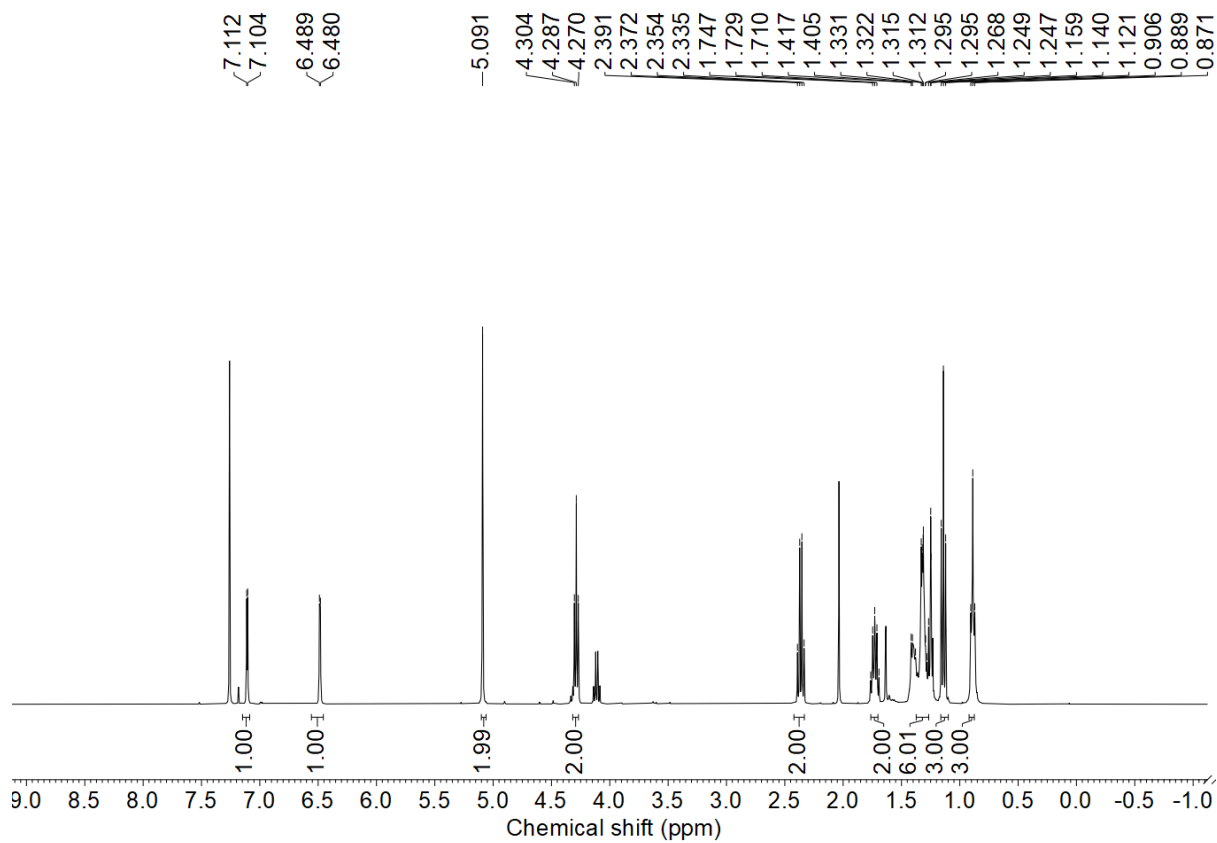

**Figure S68.** The <sup>1</sup>H-NMR spectrum of **5b**.

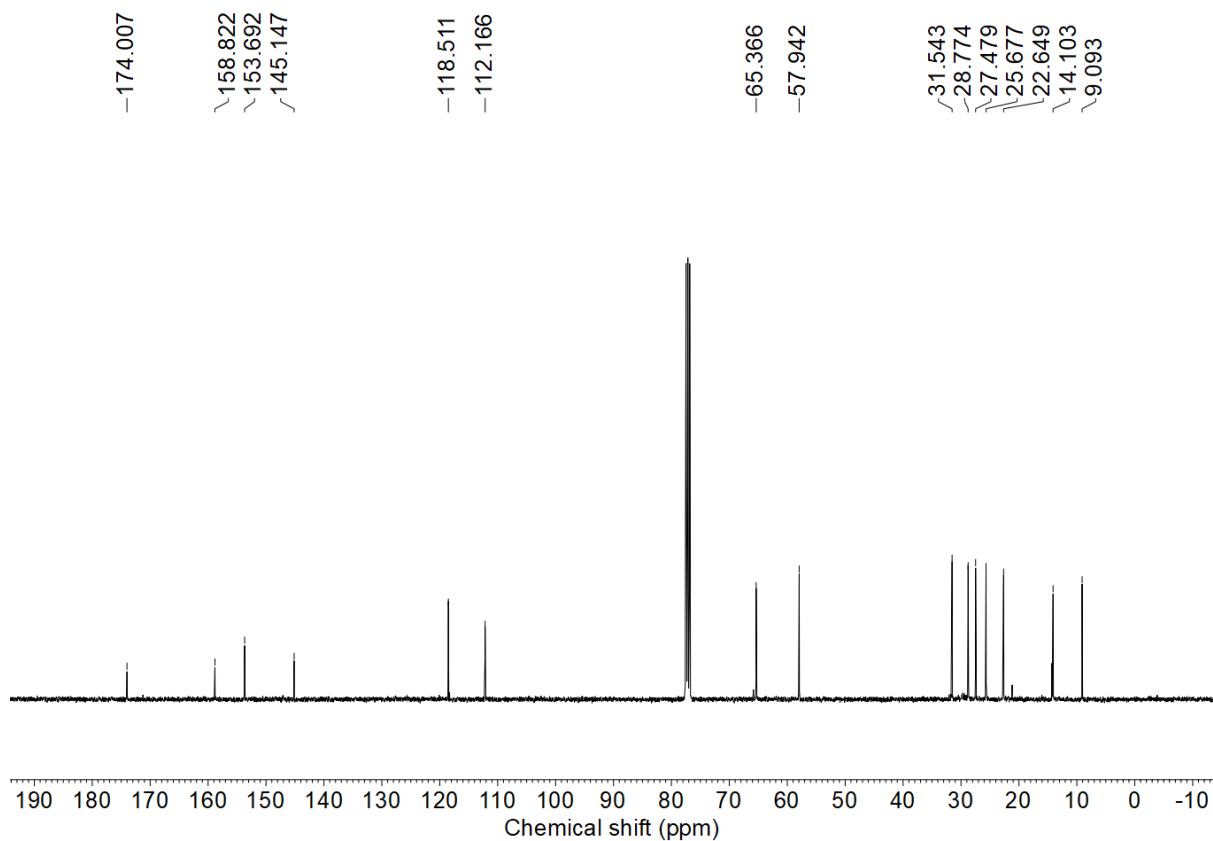

**Figure S69.** The  $^{13}\text{C}$ -NMR spectrum of **5b**.

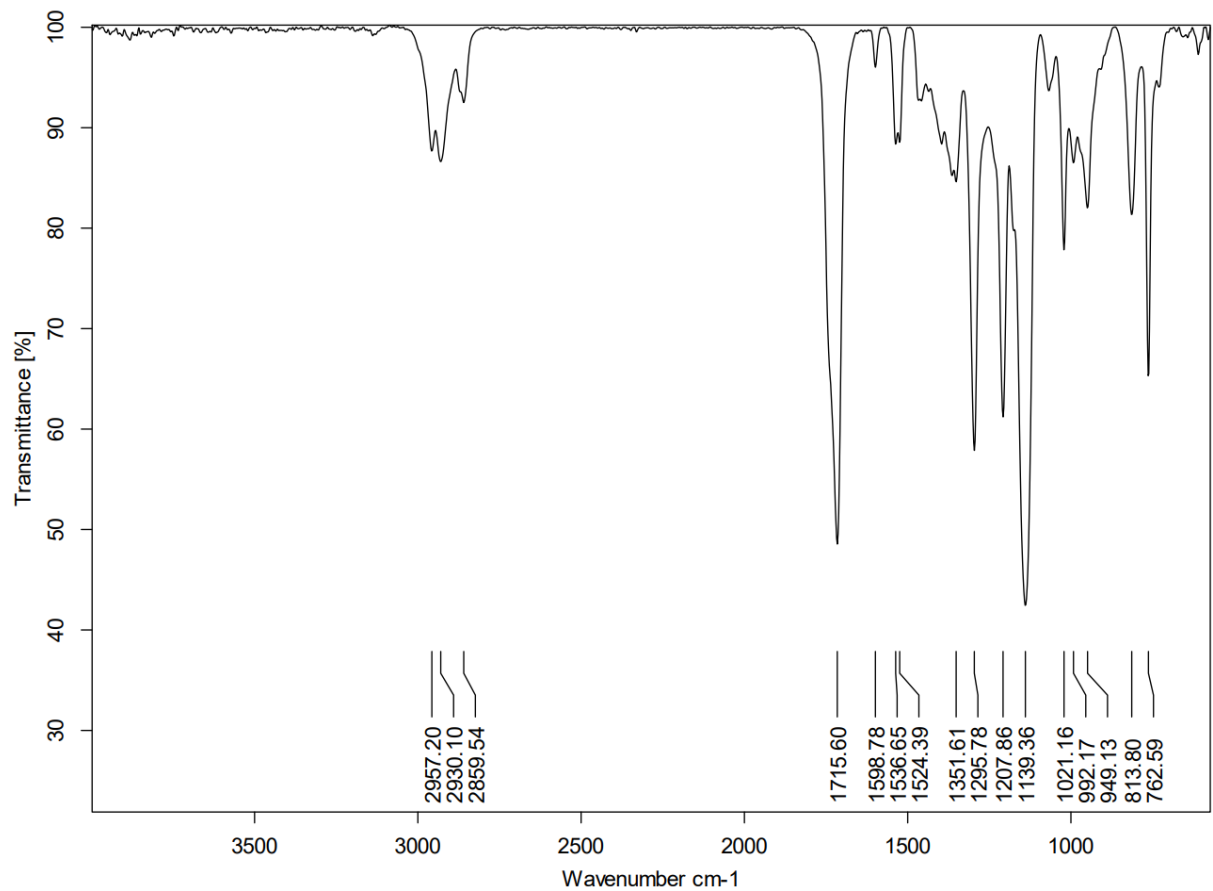

**Figure S70.** The FTIR spectrum of **5c**.



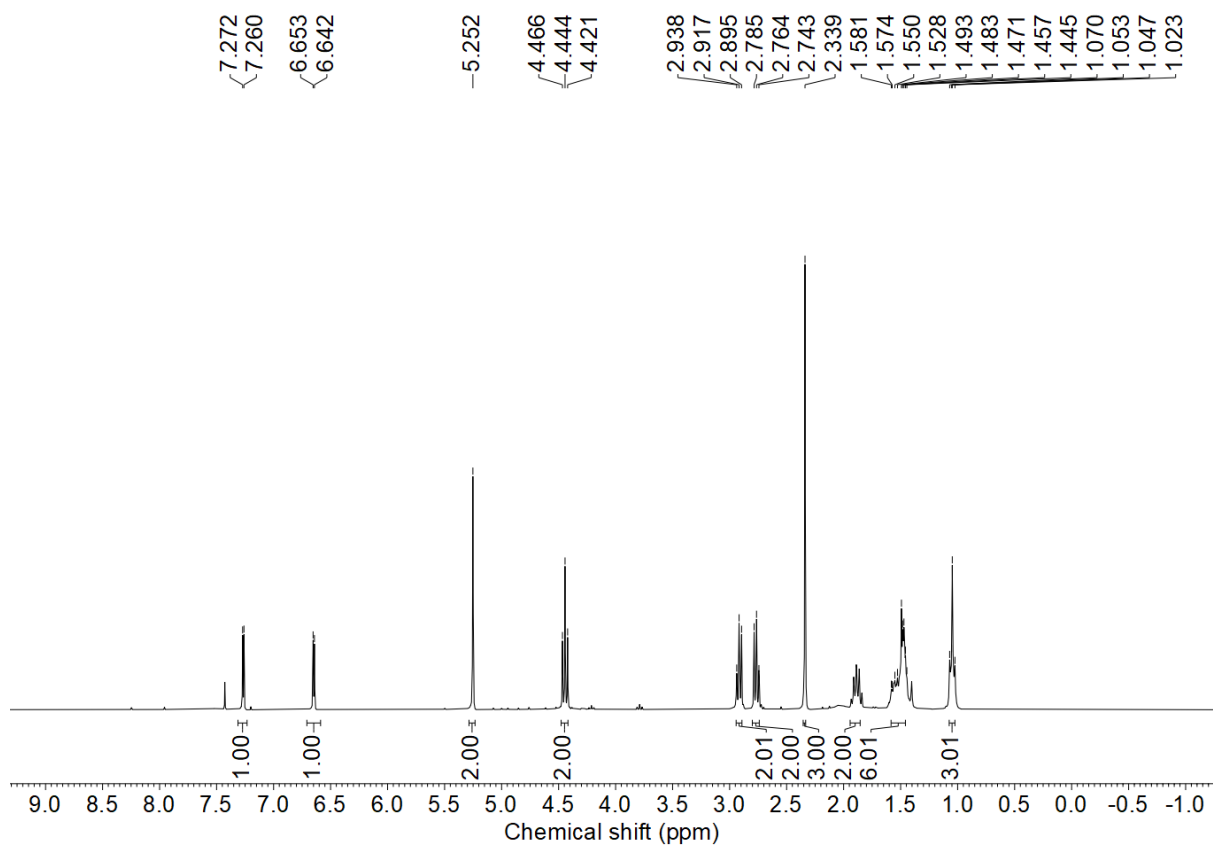

**Figure S71.** The  $^1\text{H}$ -NMR spectrum of **5c**.

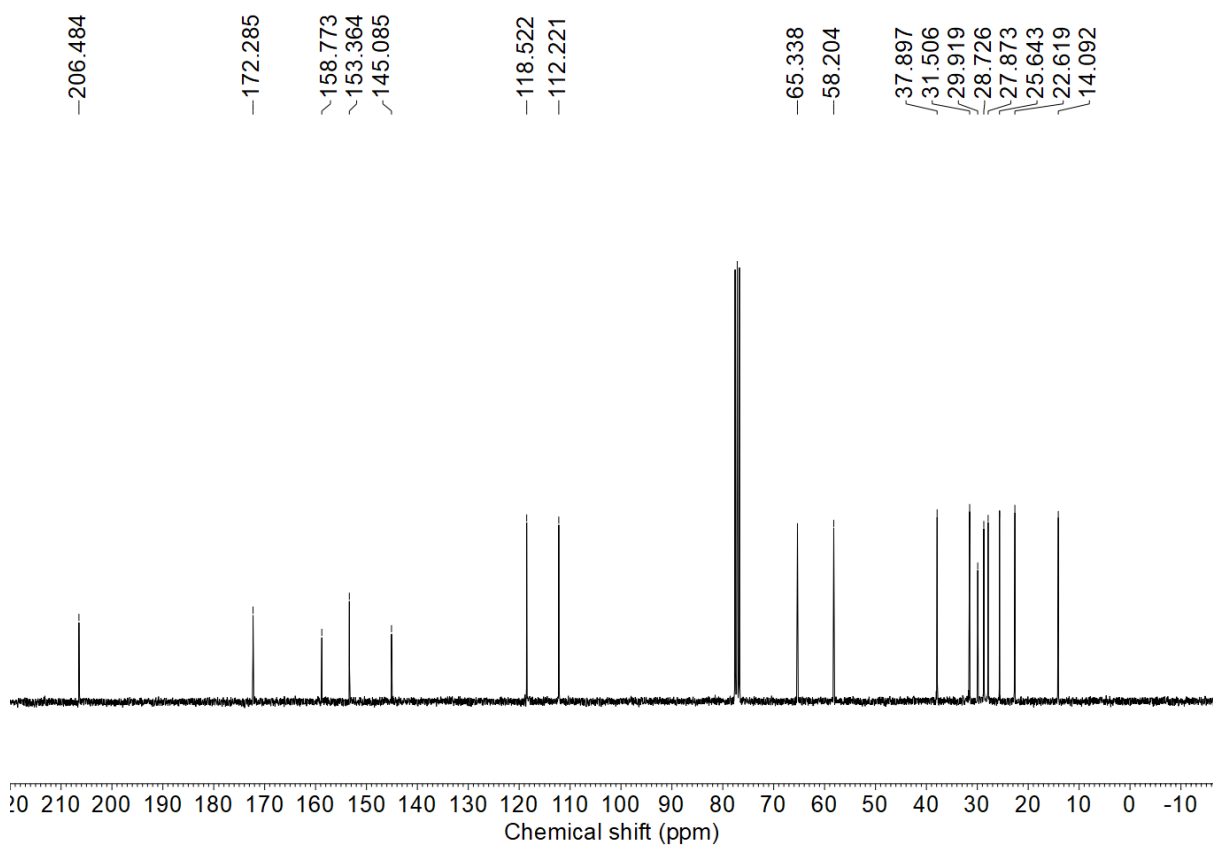

**Figure S72.** The  $^{13}\text{C}$ -NMR spectrum of **5c**.

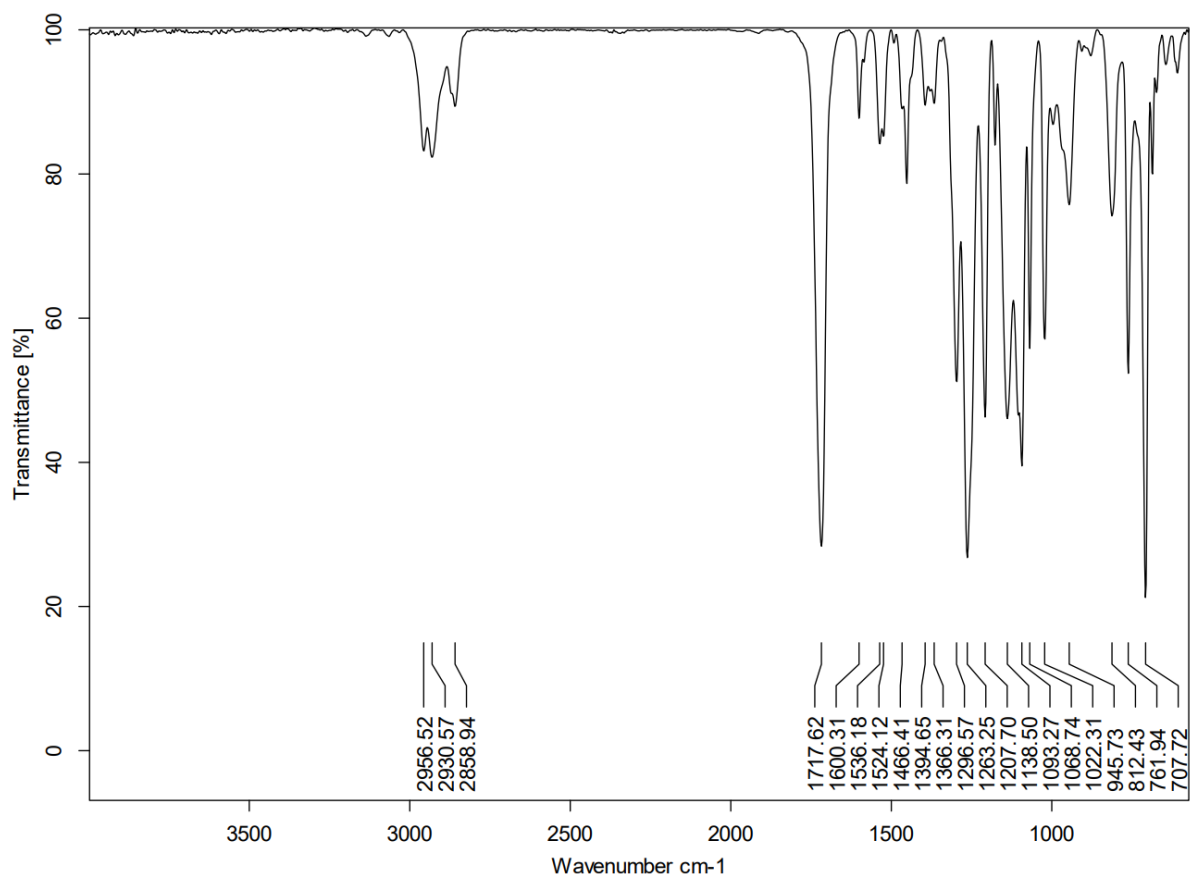

**Figure S73.** The FTIR spectrum of **5d**.

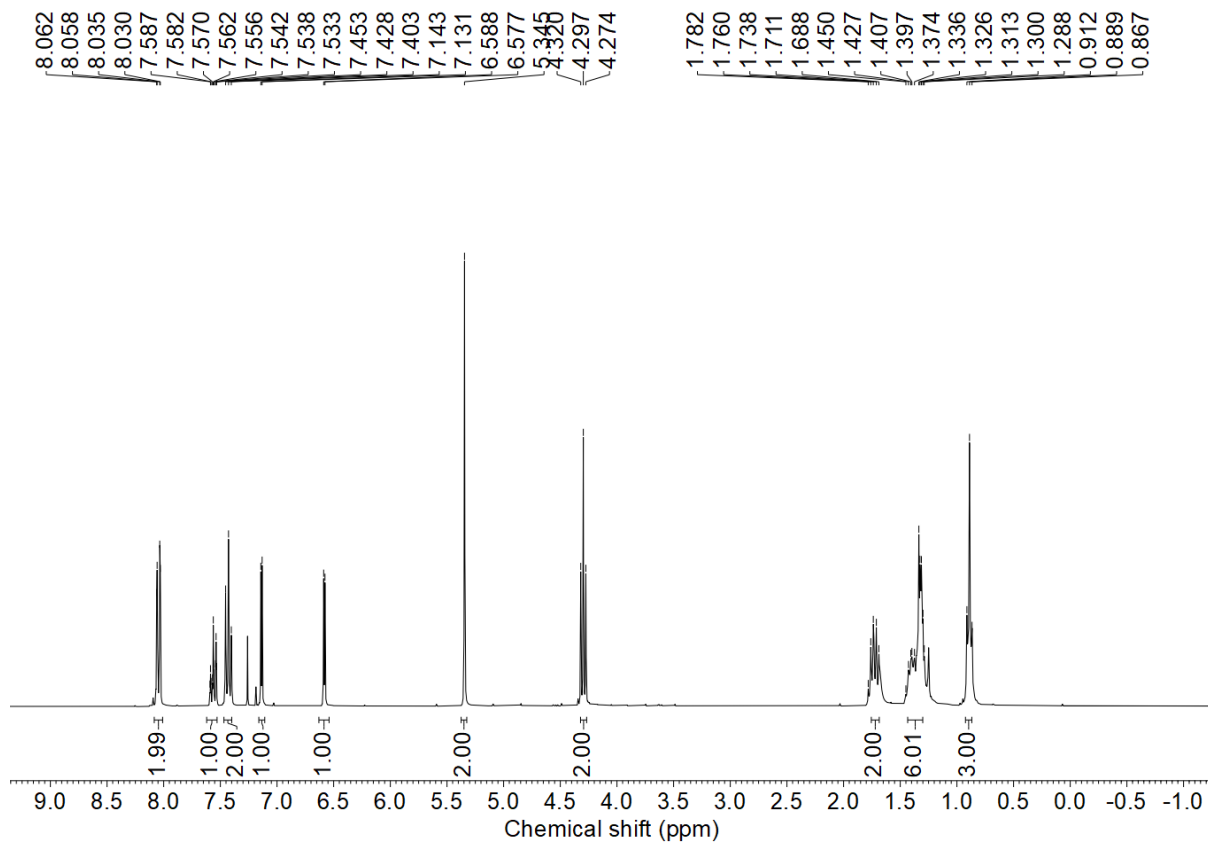

**Figure S74.** The <sup>1</sup>H-NMR spectrum of **5d**.

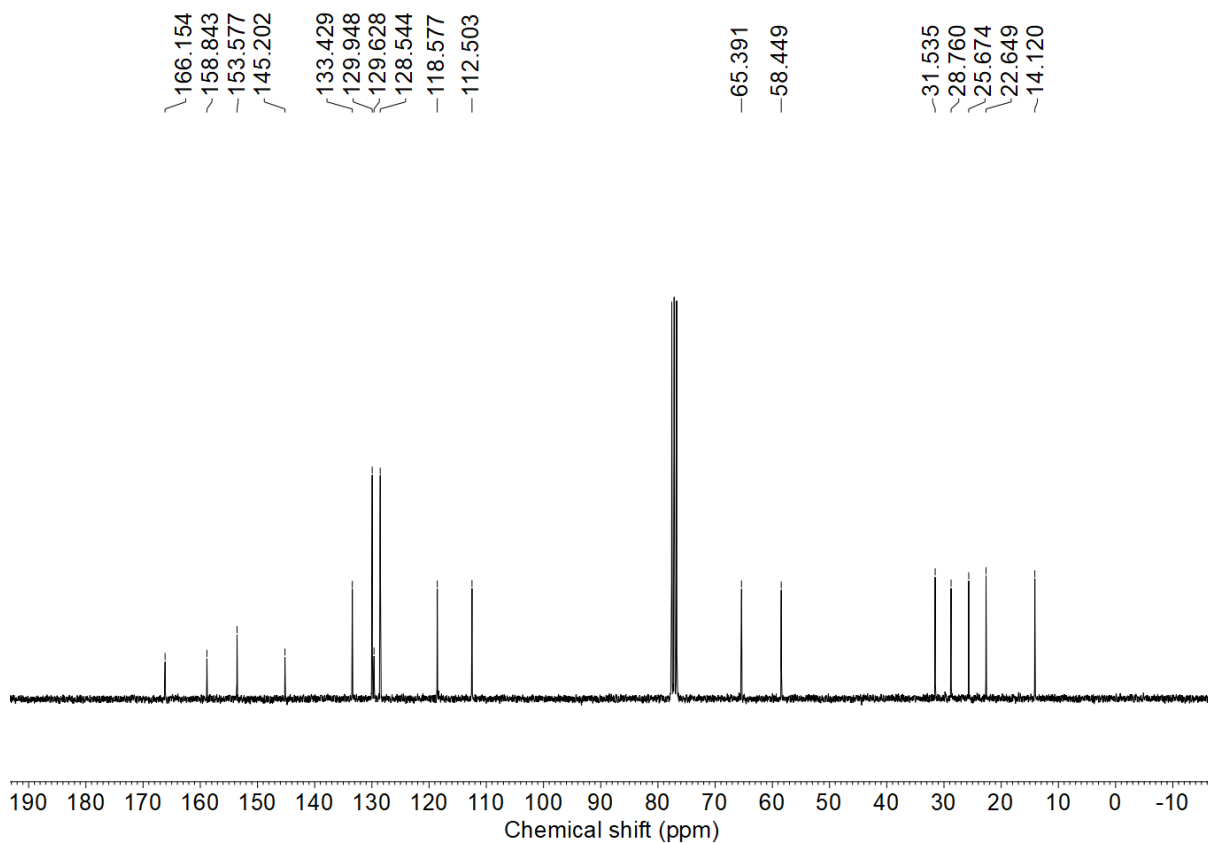

**Figure S75.** The  $^{13}\text{C}$ -NMR spectrum of **5d**.

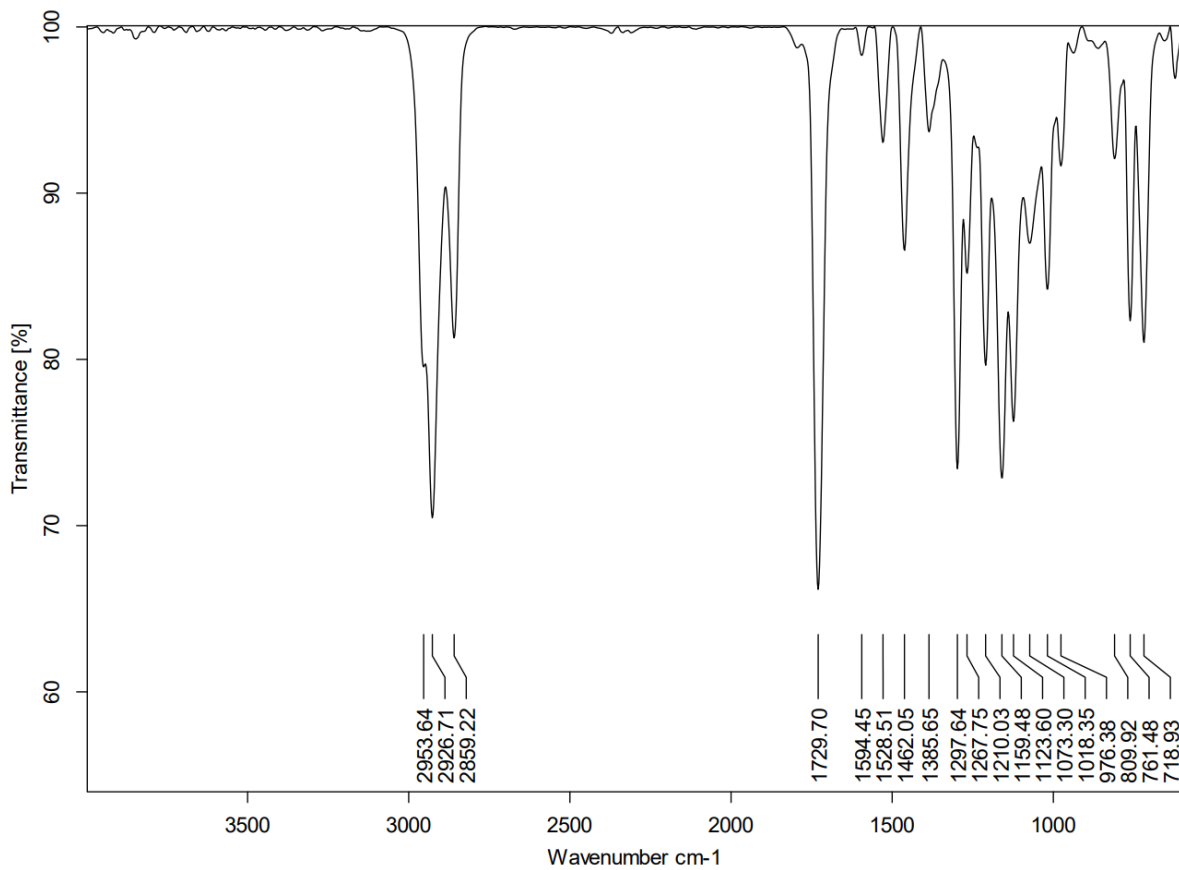

**Figure S76.** The FTIR spectrum of **6**.

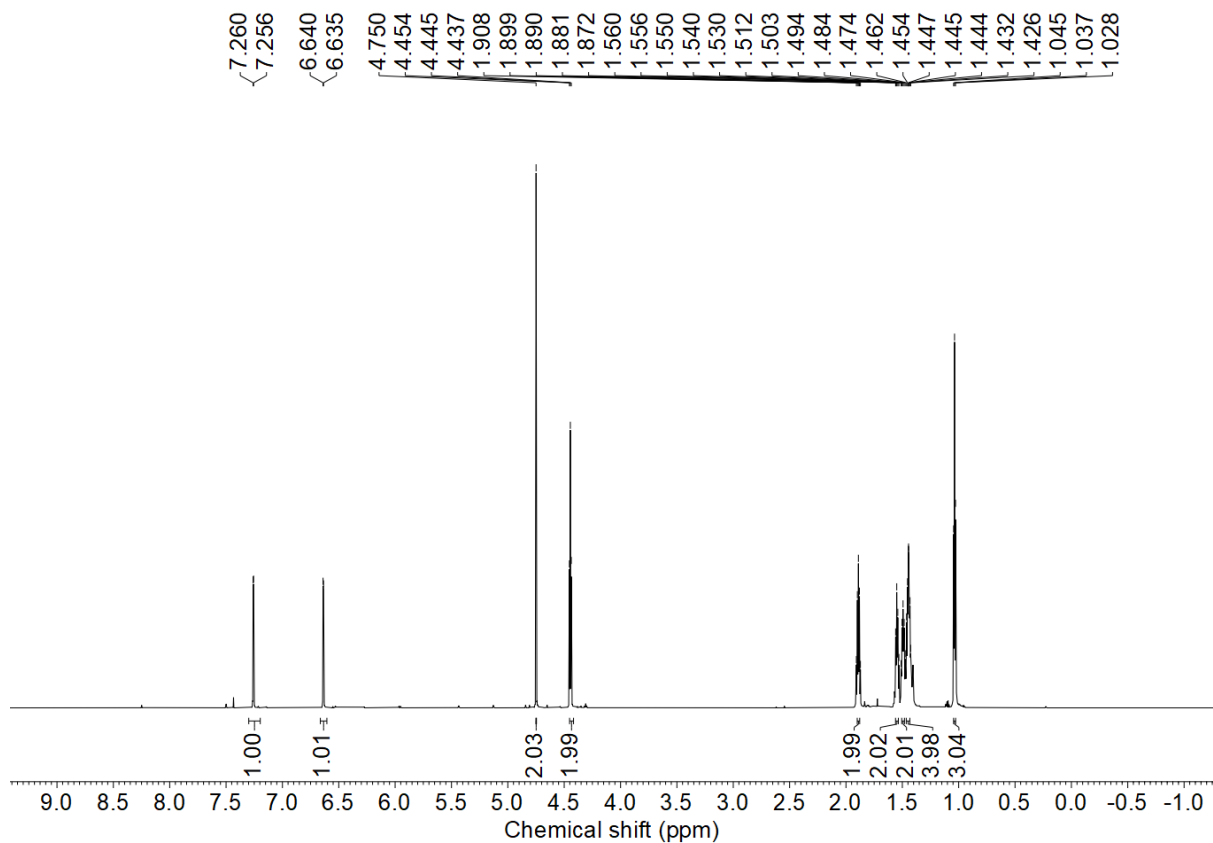

**Figure S77.** The  $^1\text{H}$ -NMR spectrum of **6**.

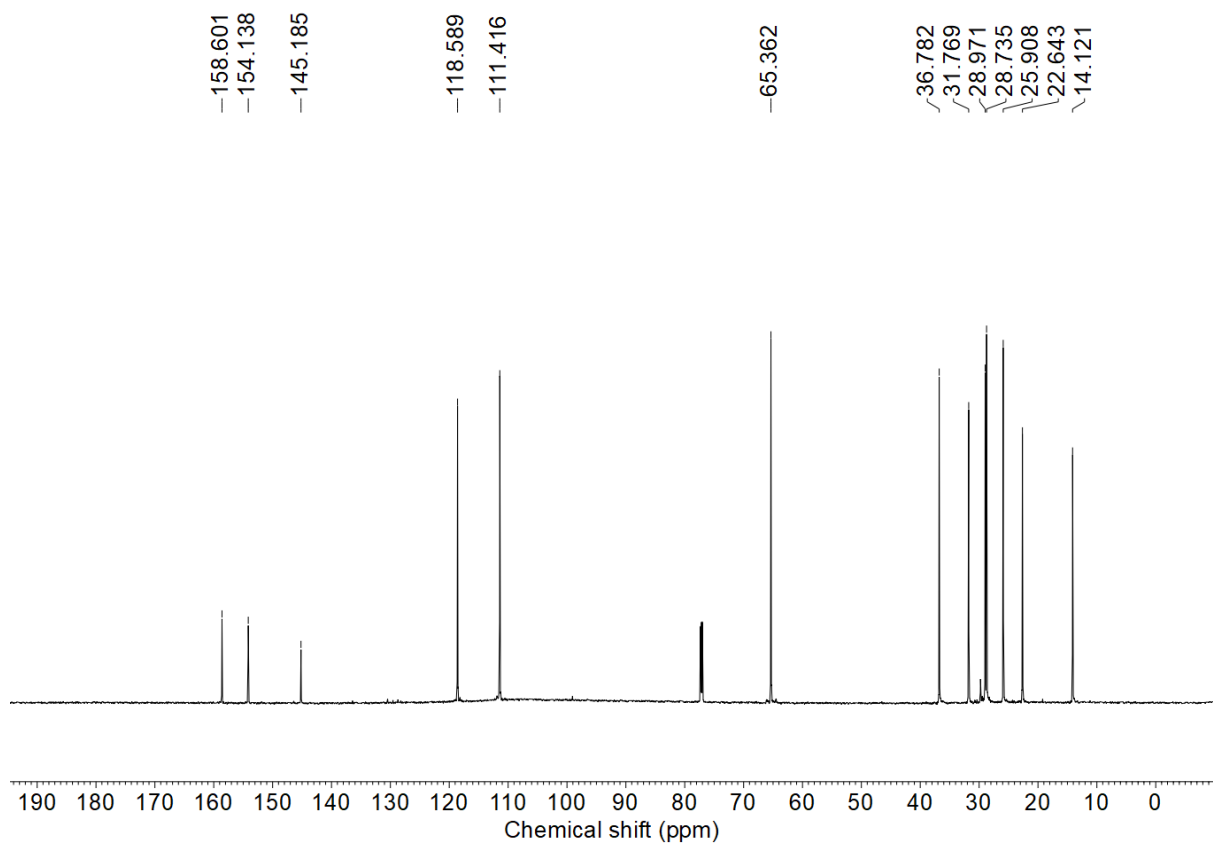

**Figure S78.** The  $^{13}\text{C}$ -NMR spectrum of **6**.

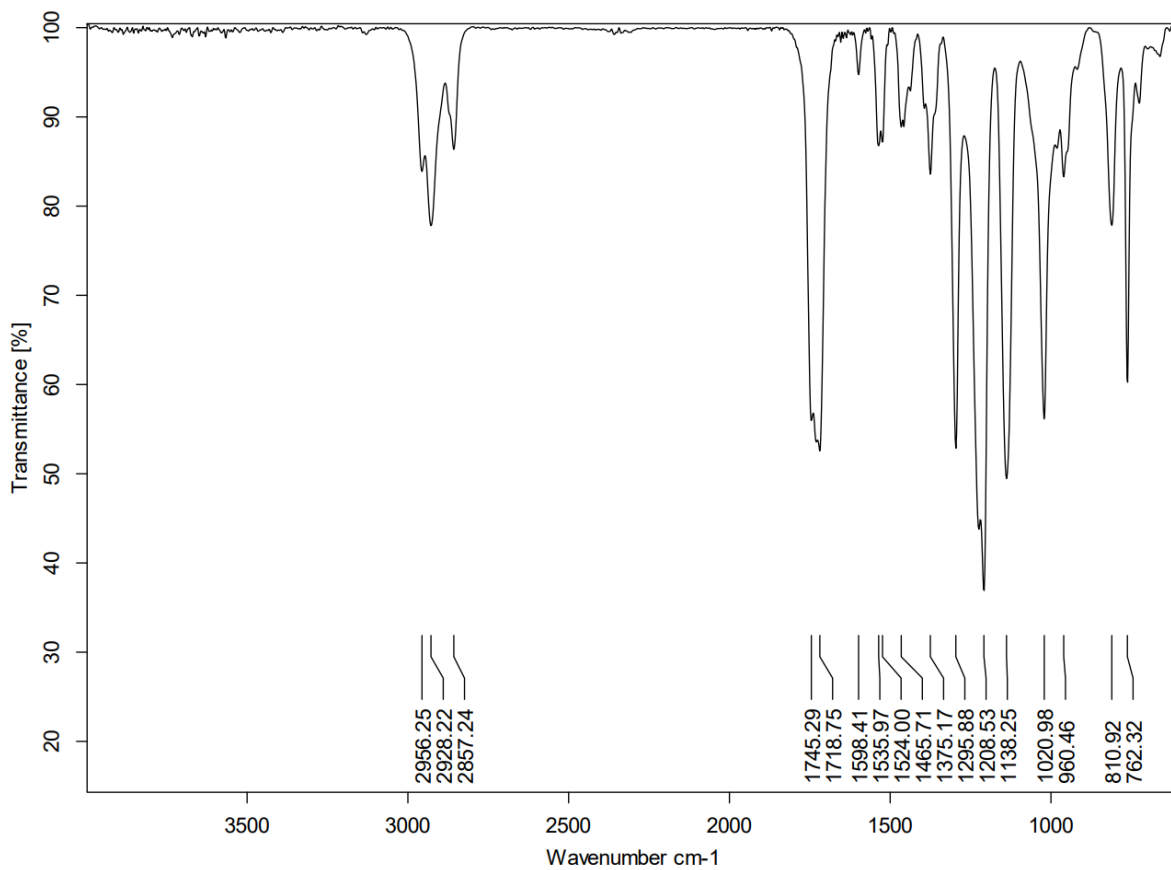

**Figure S79.** The FTIR spectrum of **6a**.

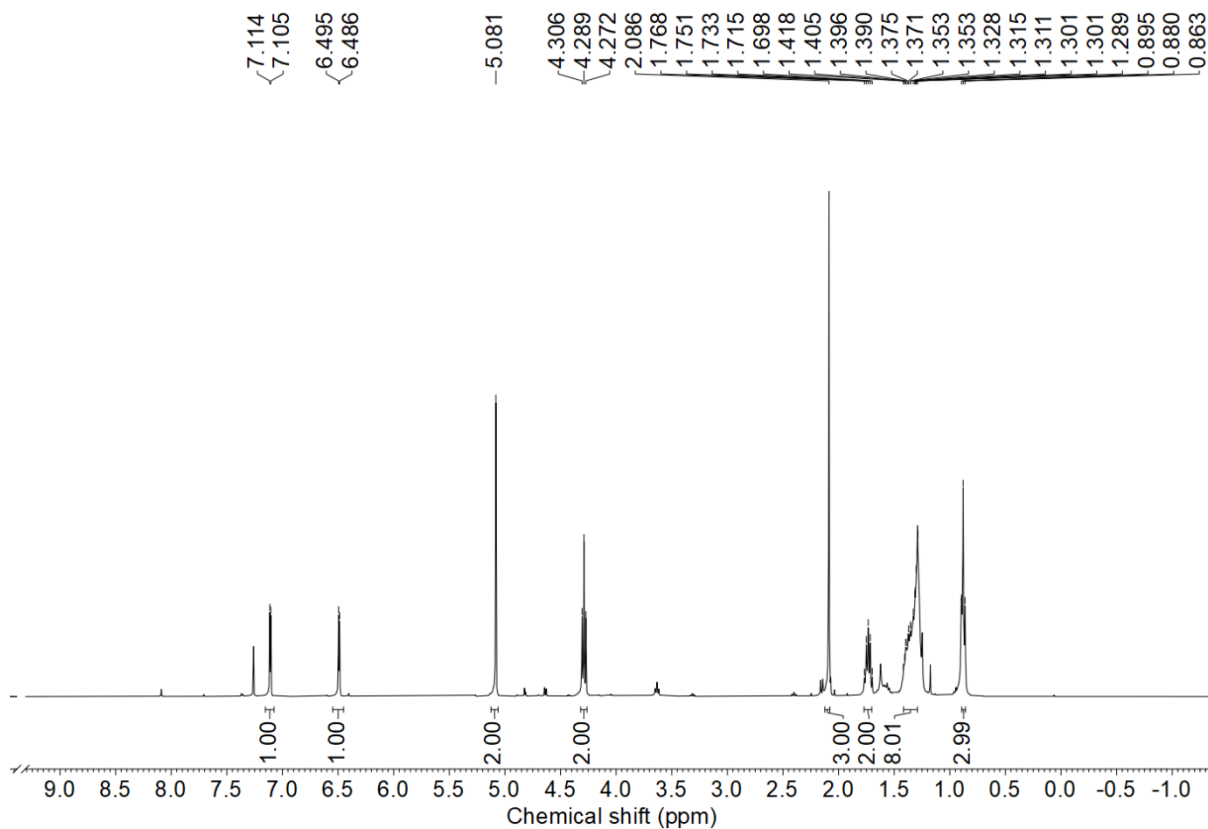

**Figure S80.** The  $^1\text{H}$ -NMR spectrum of **6a**.

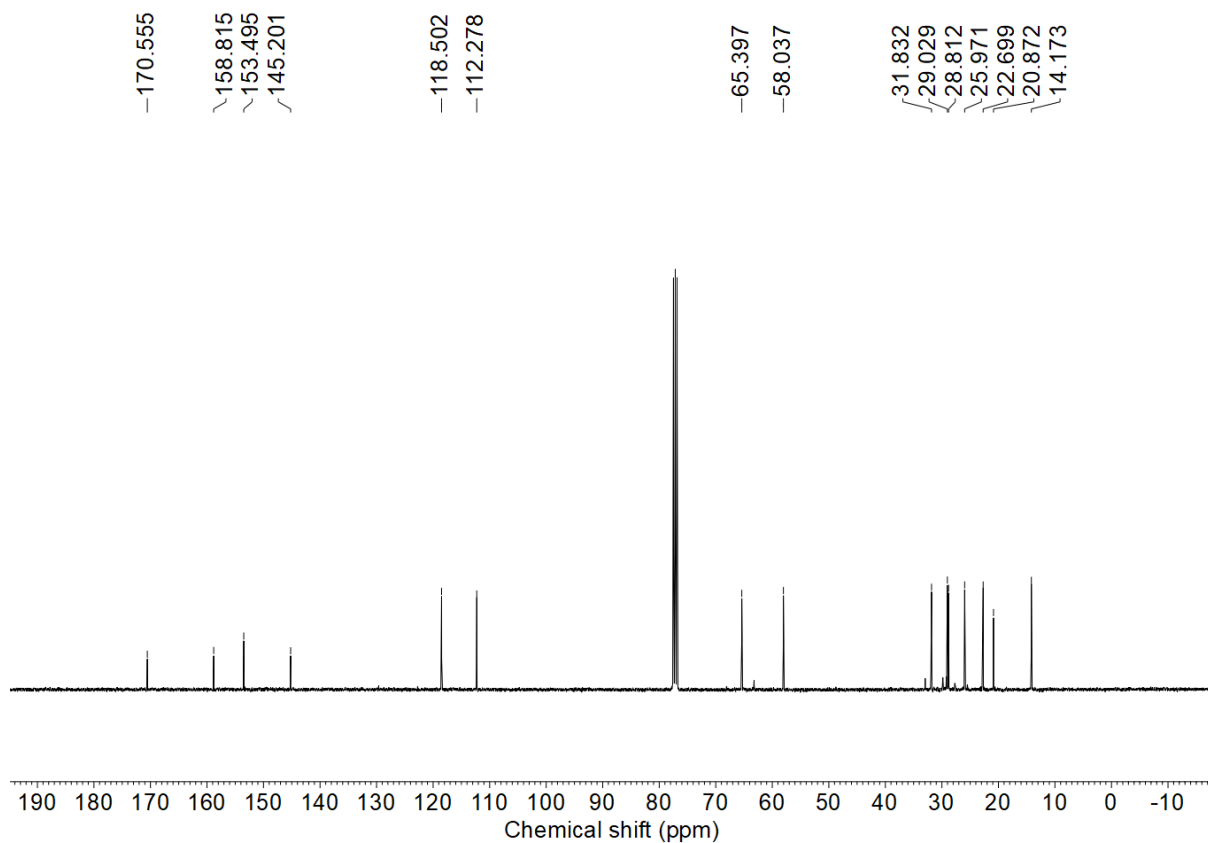

**Figure S81.** The  $^{13}\text{C}$ -NMR spectrum of **6a**.

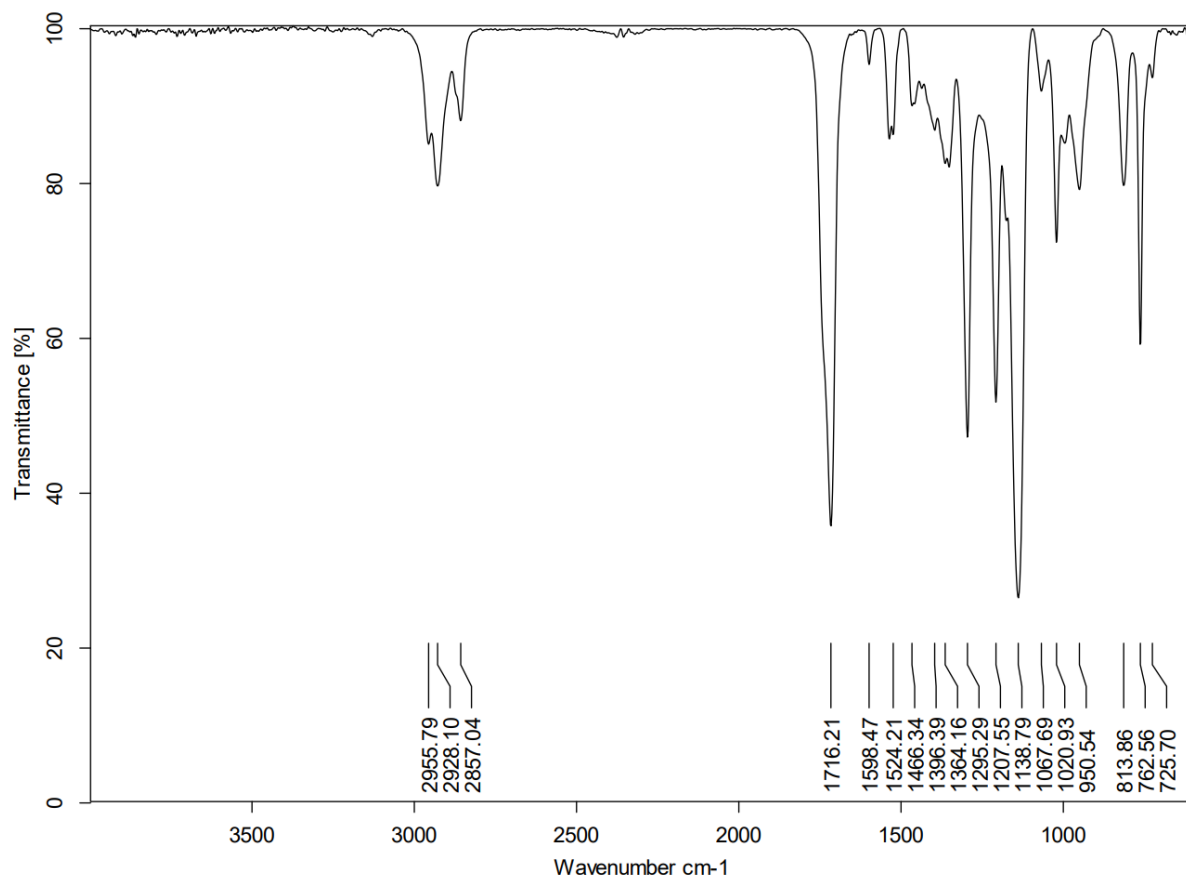

**Figure S82.** The FTIR spectrum of **6b**.

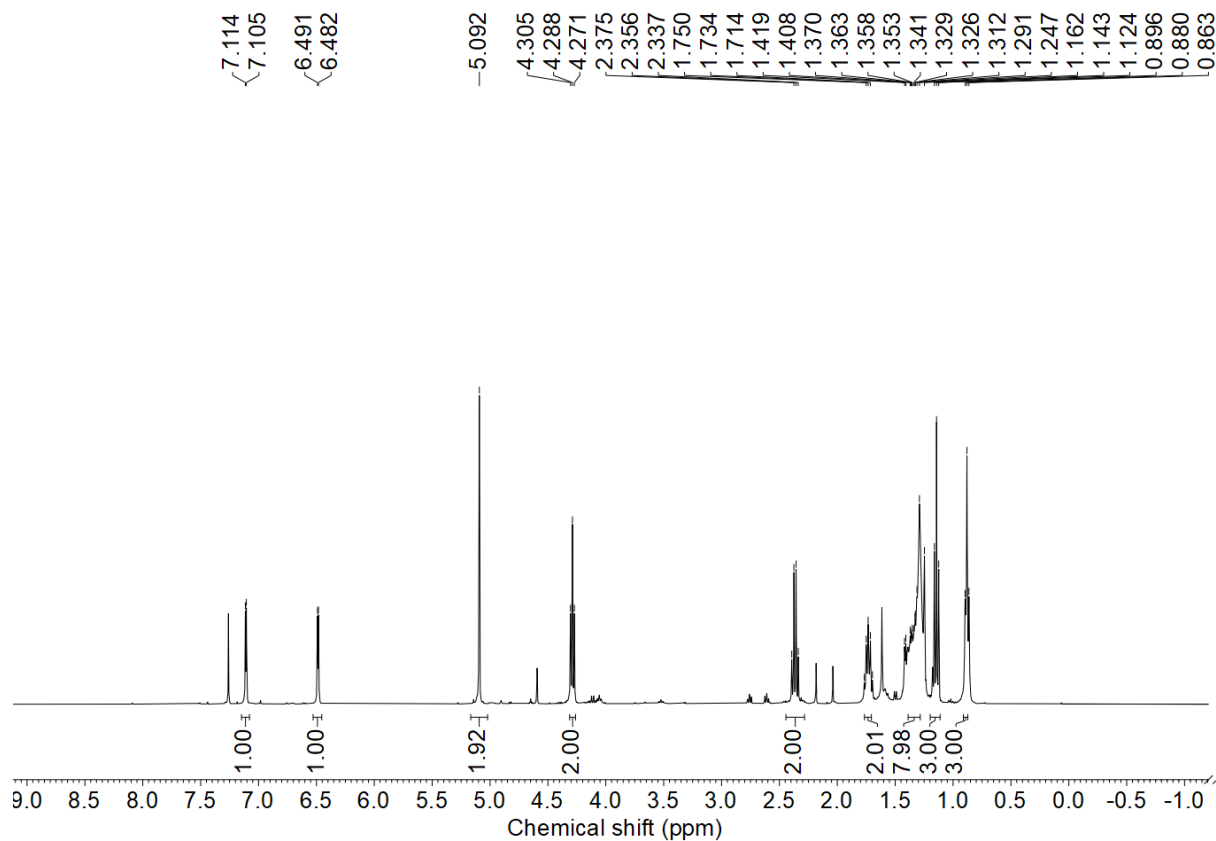

**Figure S83.** The  $^1\text{H}$ -NMR spectrum of **6b**.

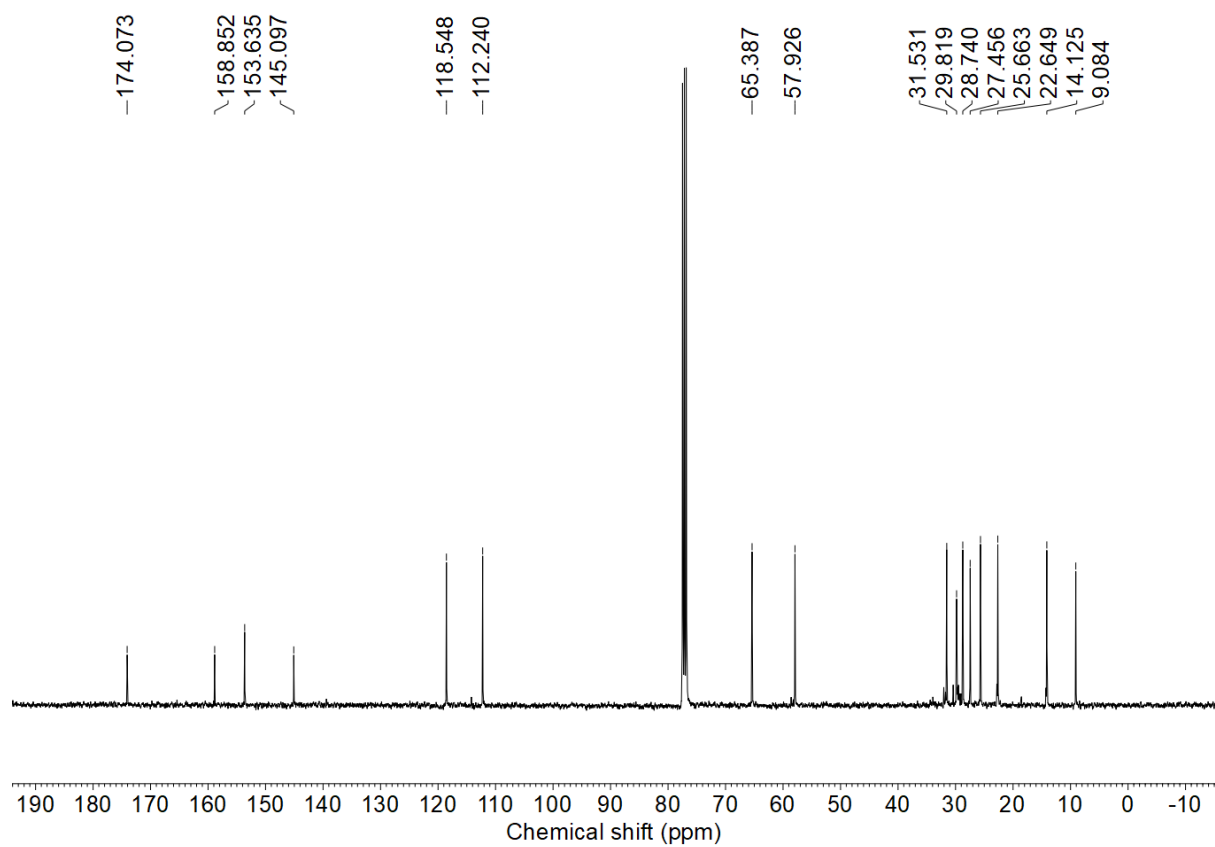

**Figure S84.** The  $^{13}\text{C}$ -NMR spectrum of **6b**.

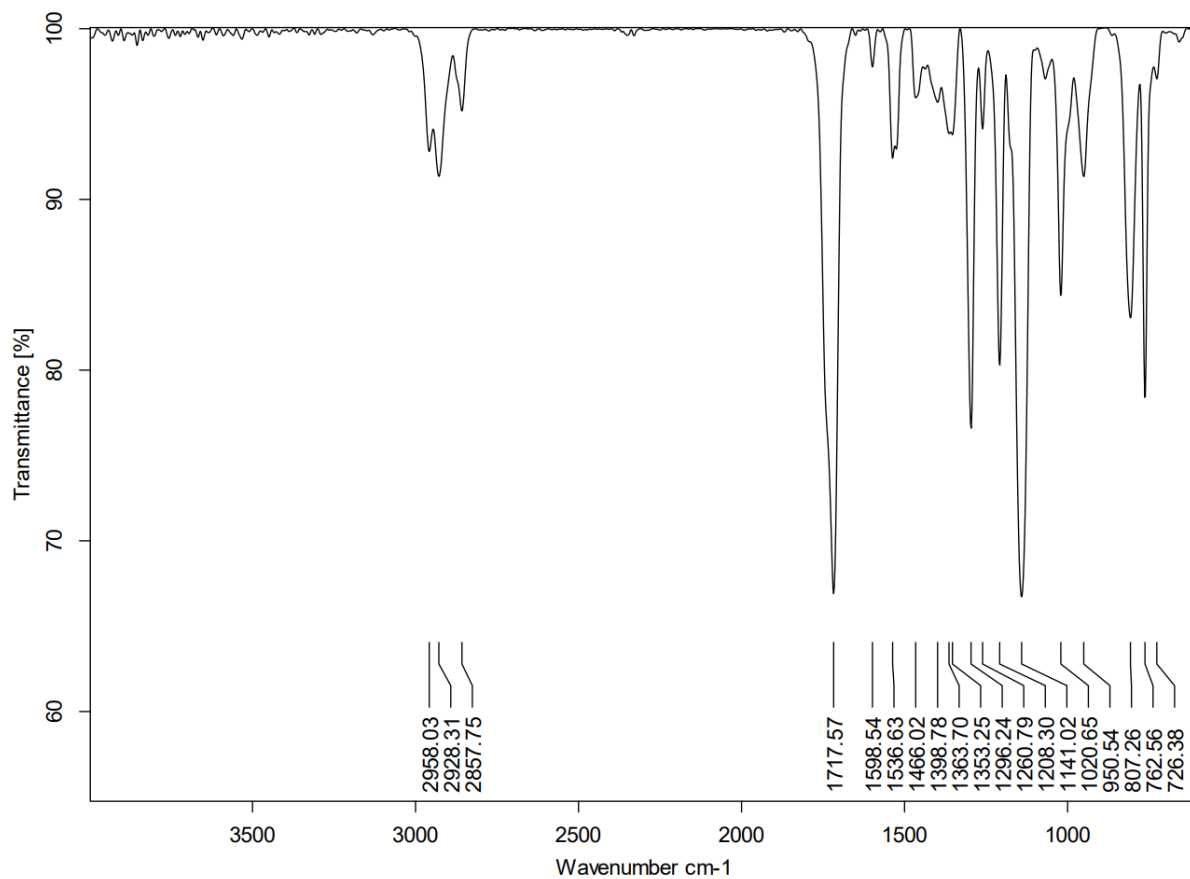

**Figure S85.** The FTIR spectrum of **6c**.

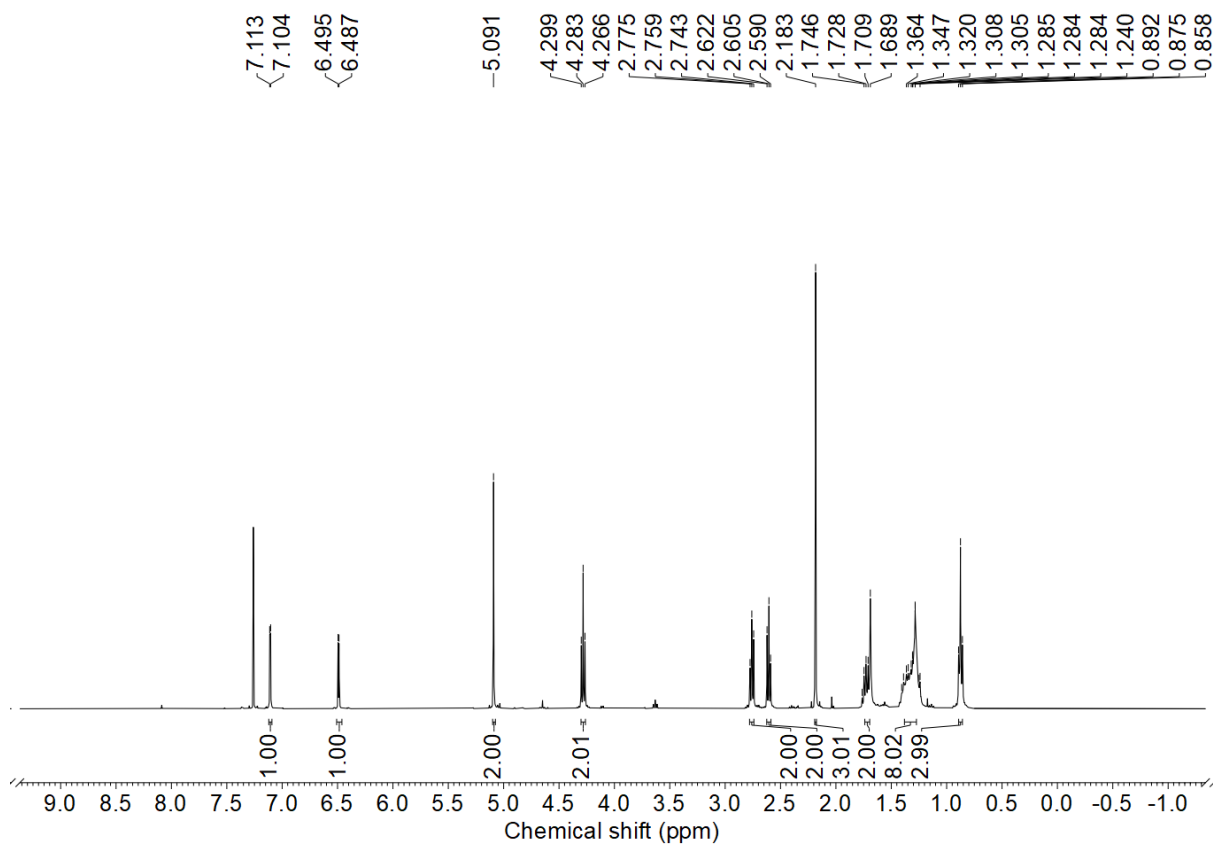

**Figure S86.** The <sup>1</sup>H-NMR spectrum of **6c**.



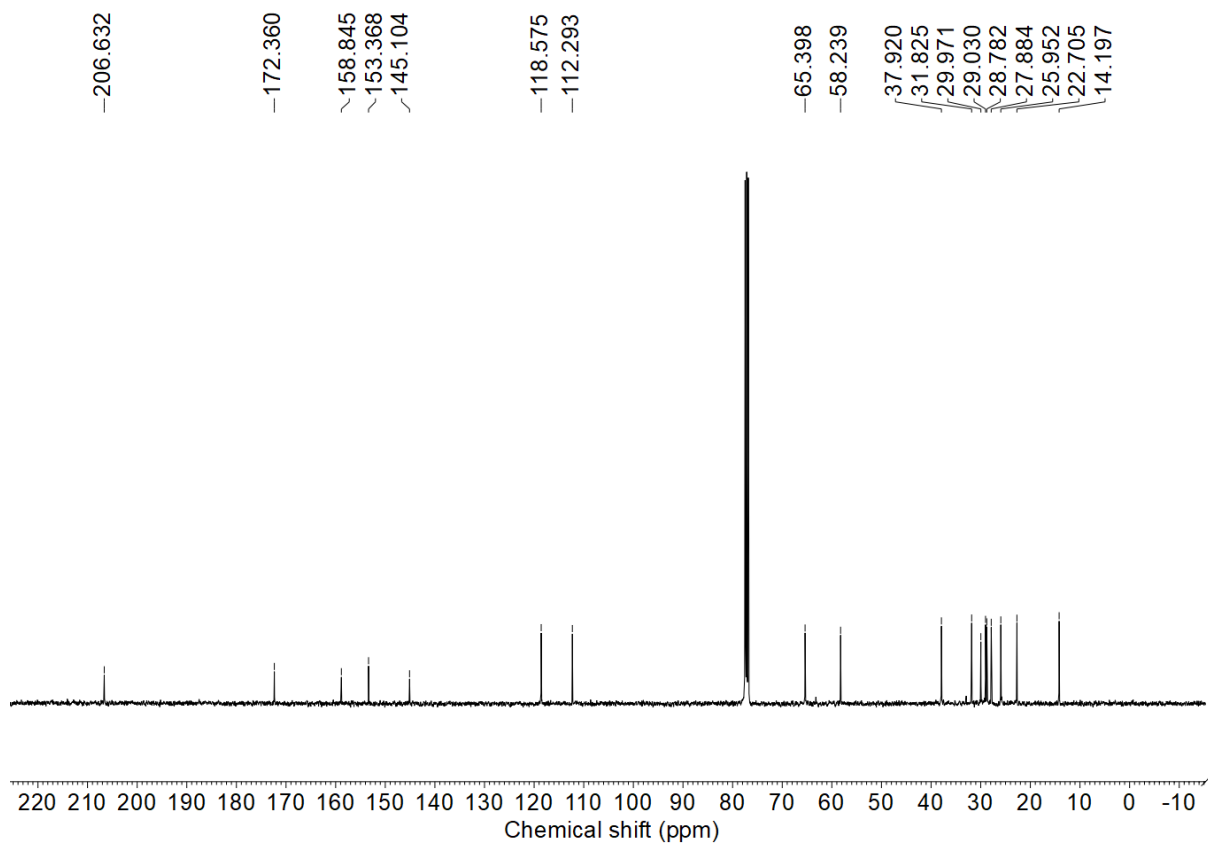

**Figure S87.** The  $^{13}\text{C}$ -NMR spectrum of **6c**.

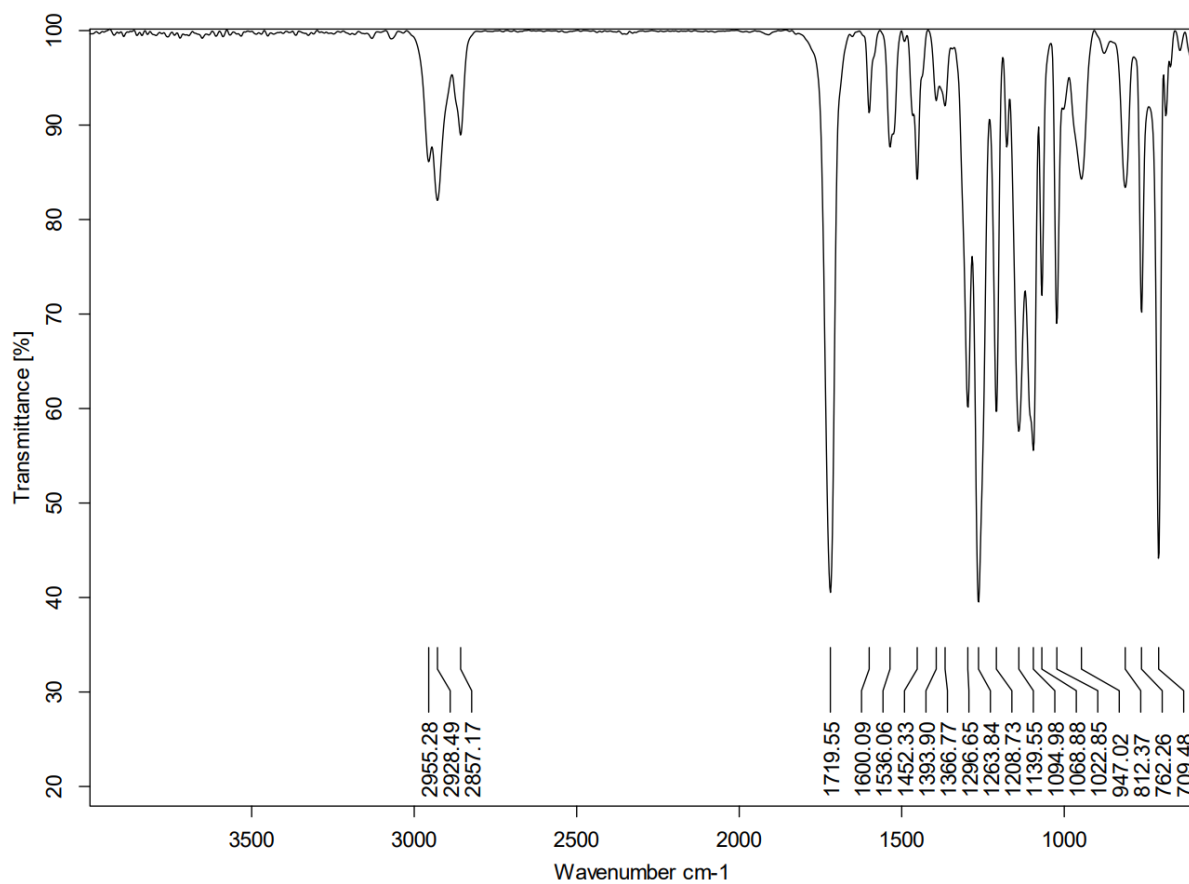

**Figure S88.** The FTIR spectrum of **6d**.

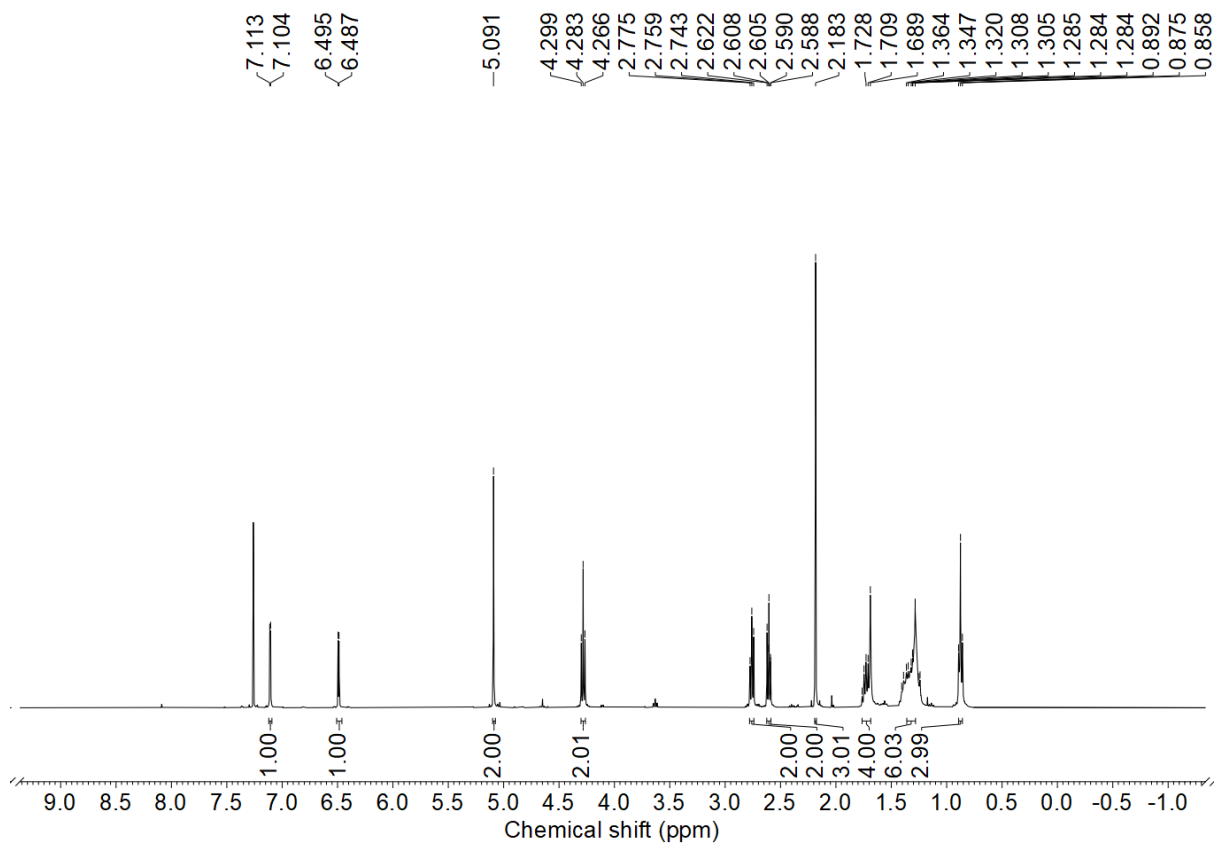

**Figure S89.** The  $^1\text{H}$ -NMR spectrum of **6d**.

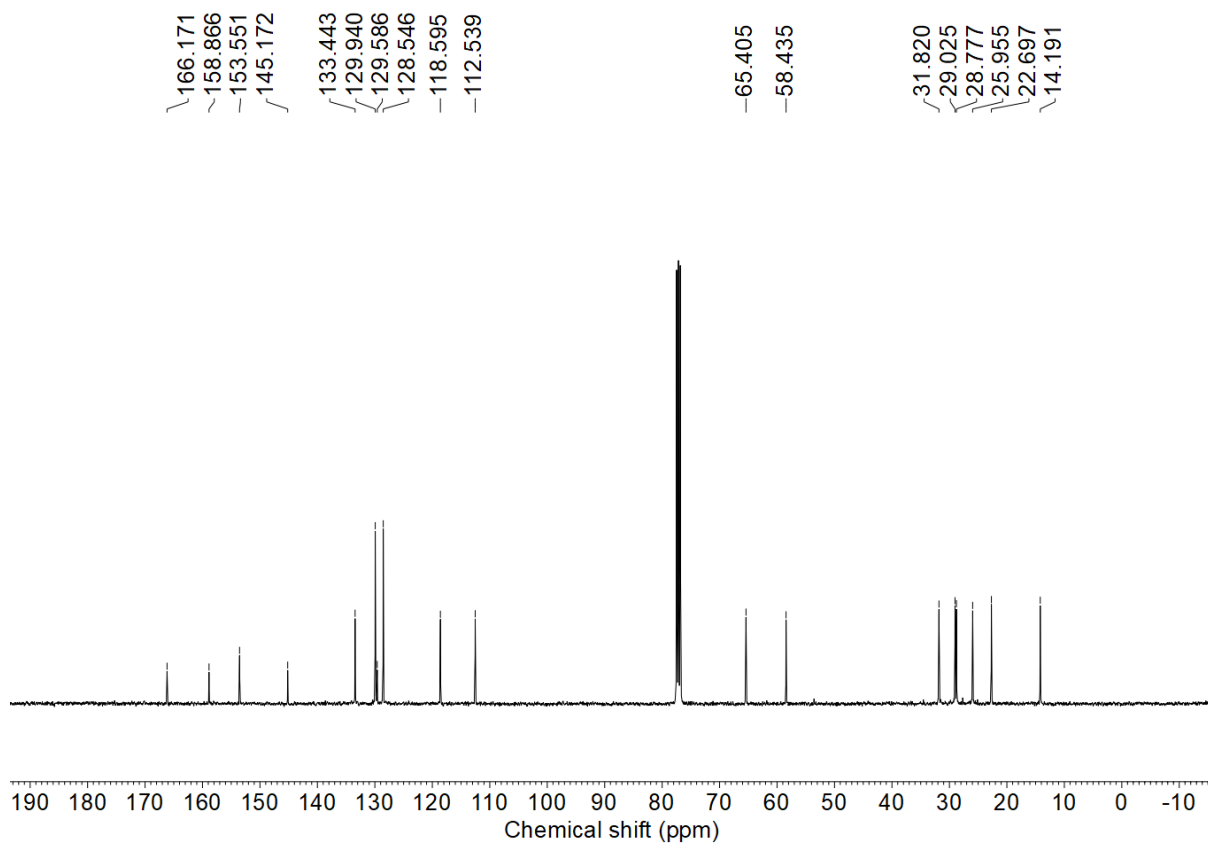

**Figure S90.** The  $^{13}\text{C}$ -NMR spectrum of **6d**.

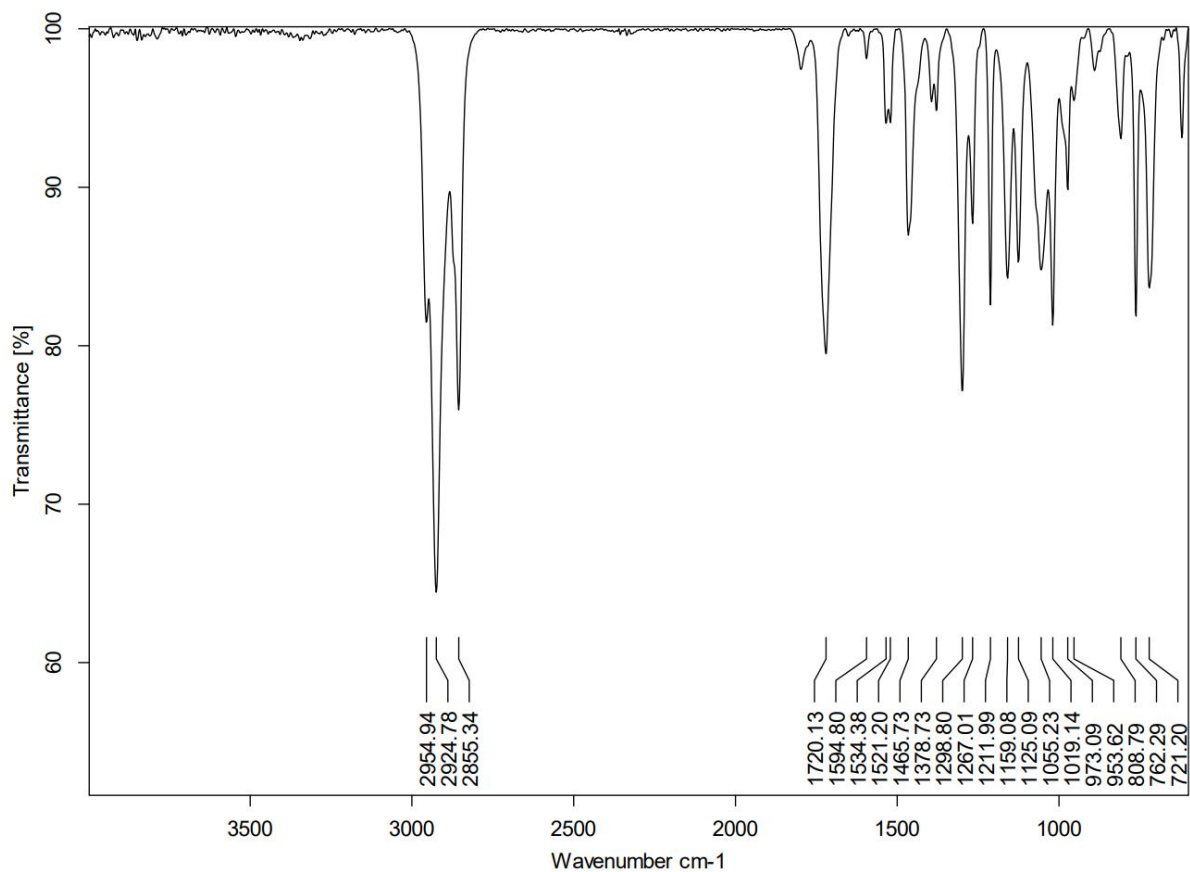

**Figure S91.** The FTIR spectrum of 7.

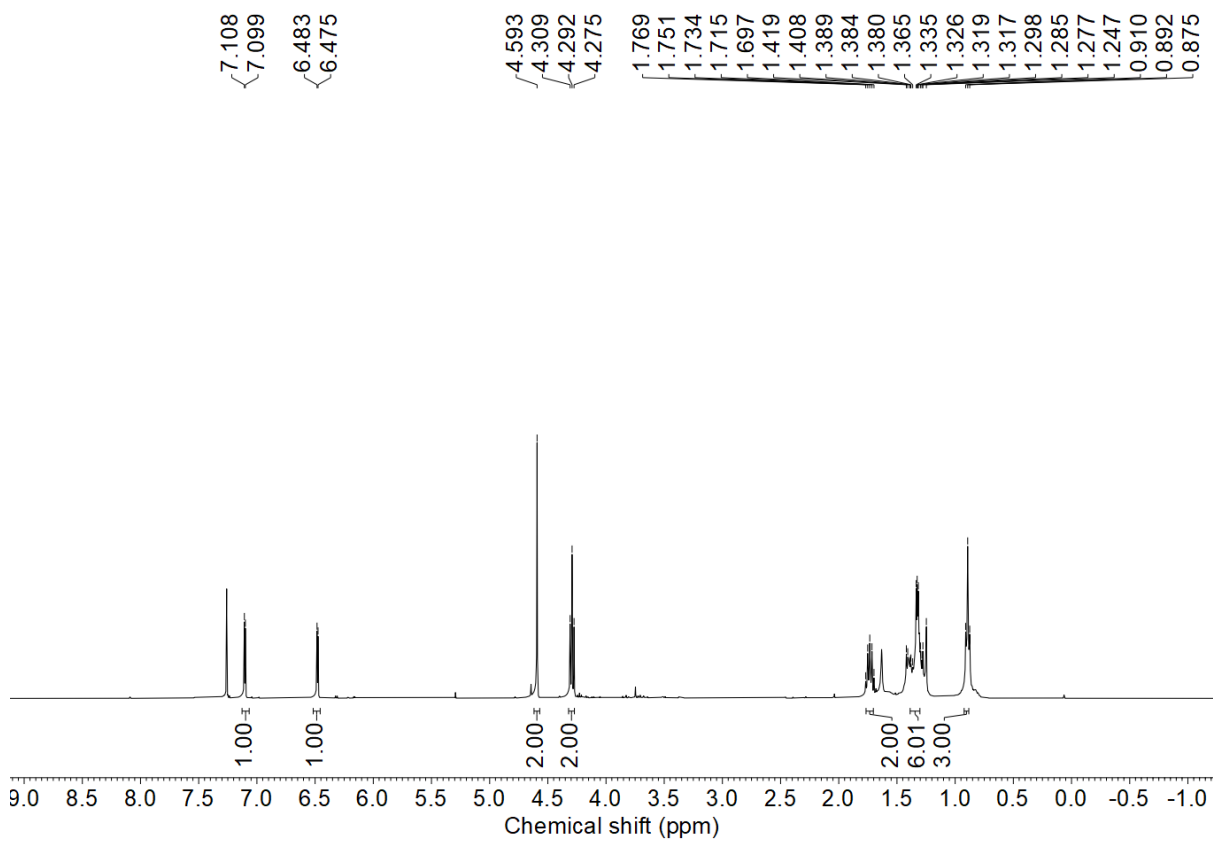

**Figure S92.** The <sup>1</sup>H-NMR spectrum of 7.

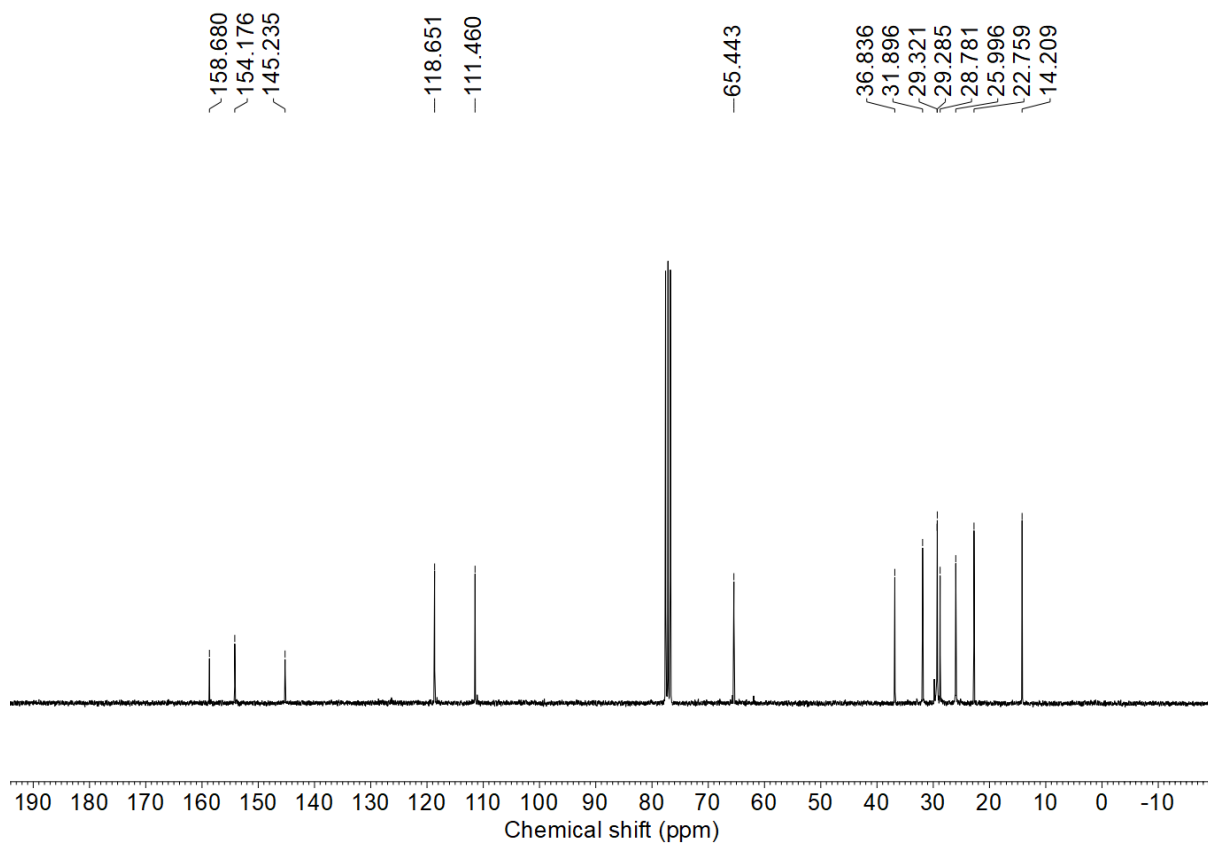

**Figure S93.** The  $^{13}\text{C}$ -NMR spectrum of **7**.

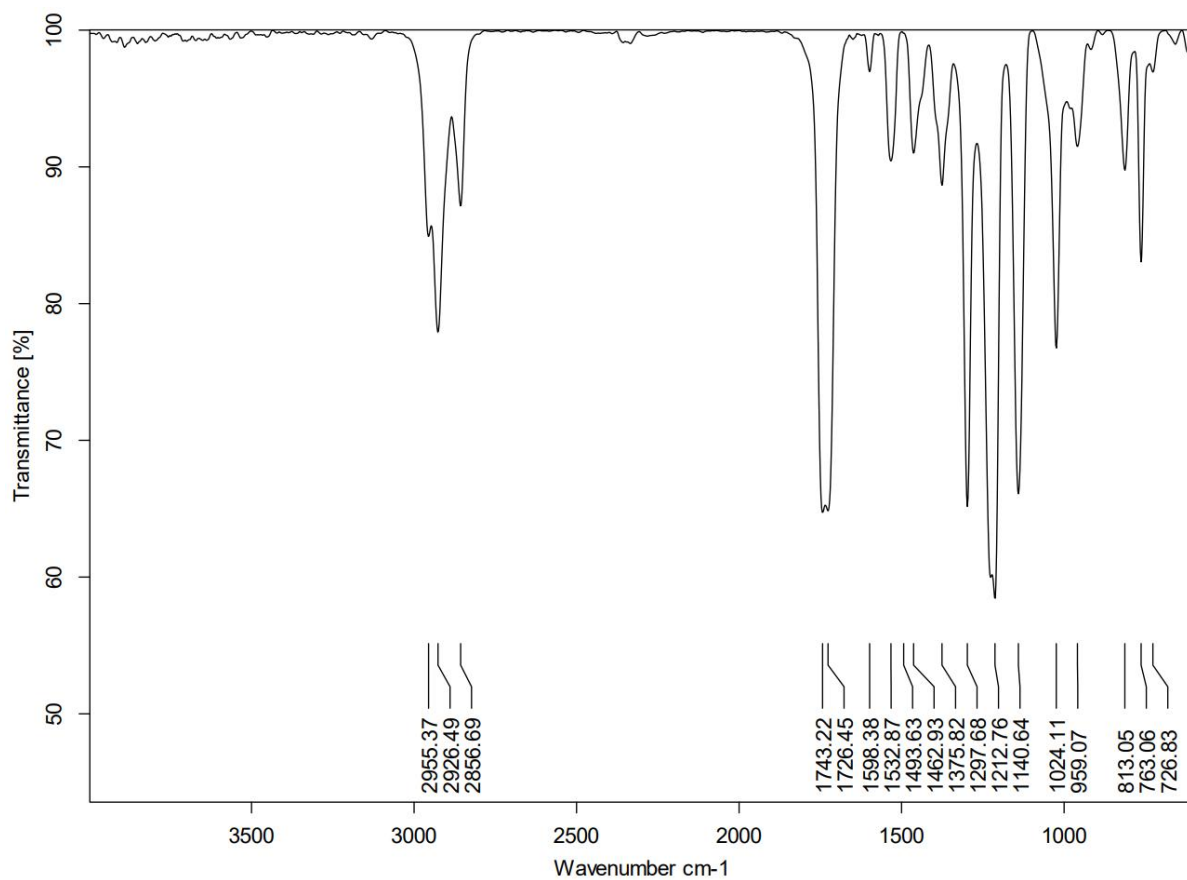

**Figure S94.** The FTIR spectrum of **7a**.

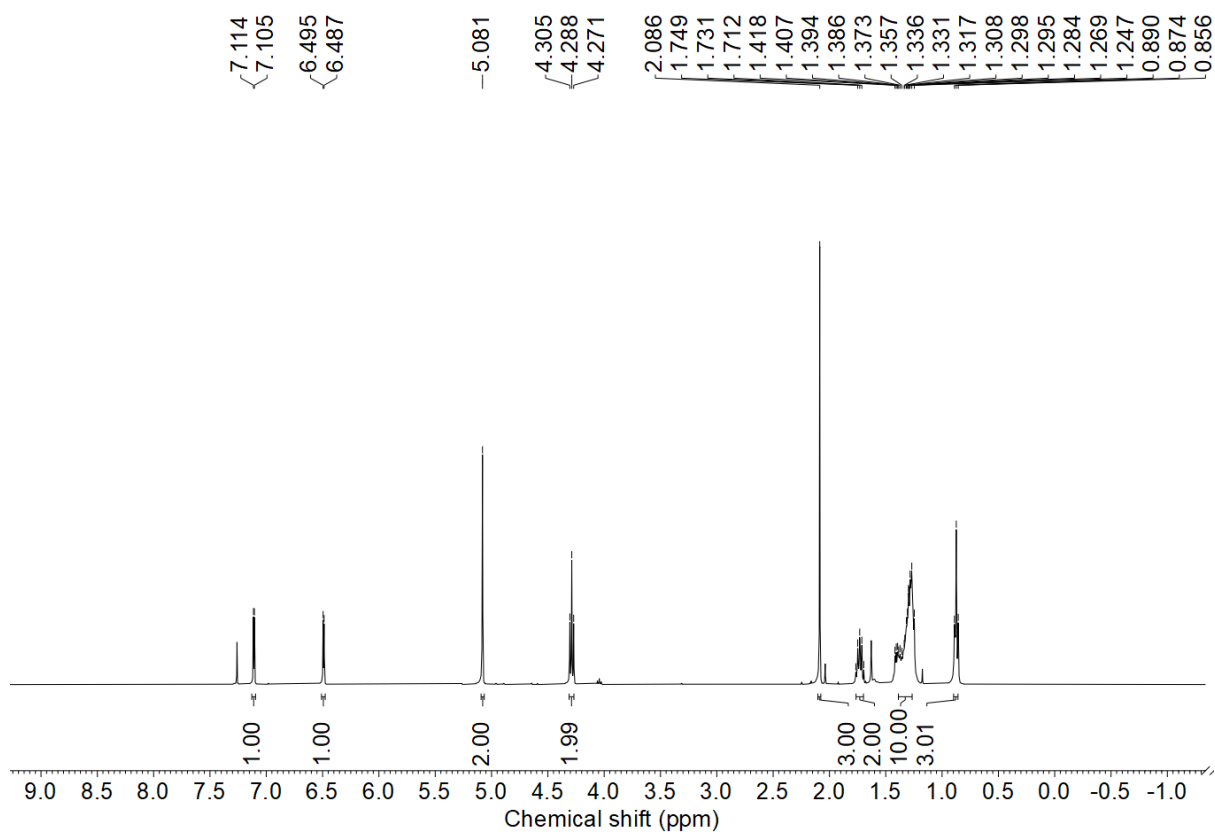

**Figure S95.** The  $^1\text{H}$ -NMR spectrum of **7a**.

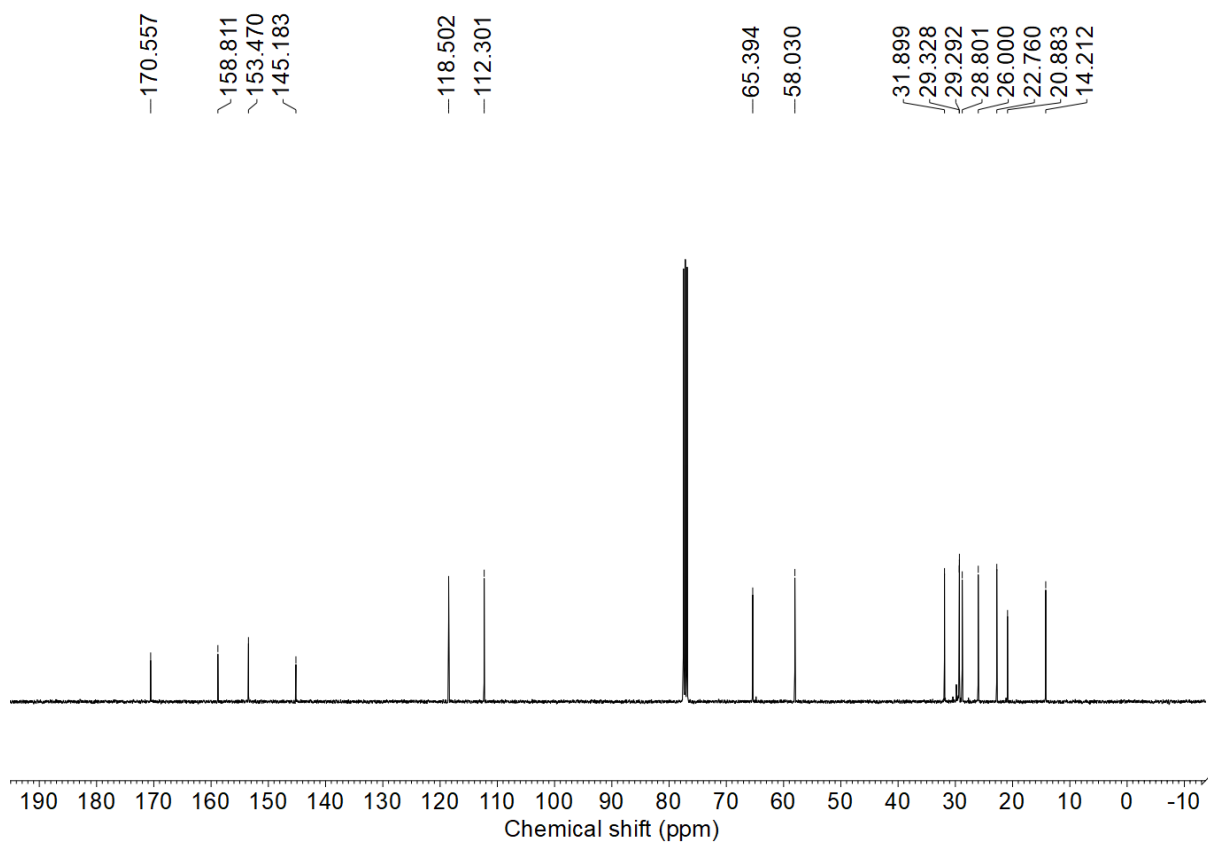

**Figure S96.** The  $^{13}\text{C}$ -NMR spectrum of **7a**.

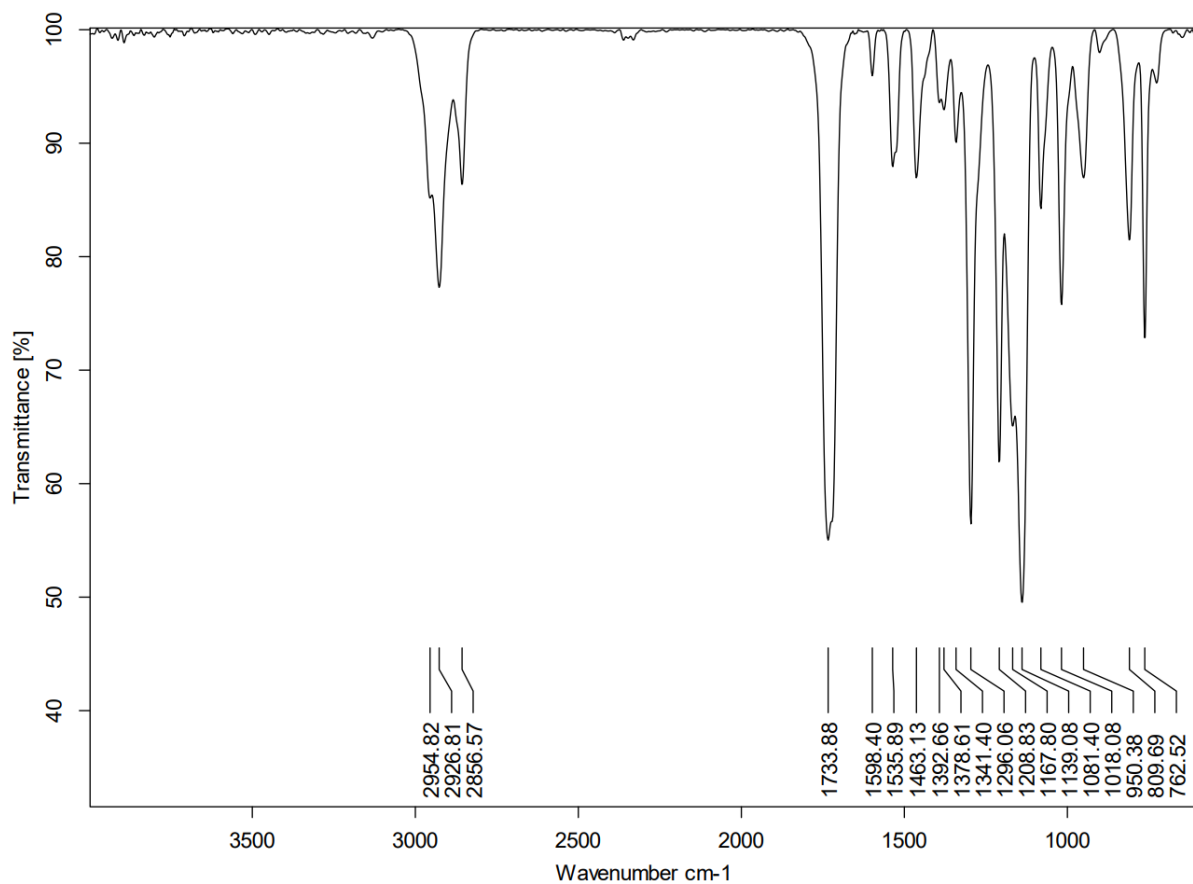

**Figure S97.** The FTIR spectrum of **7b**.

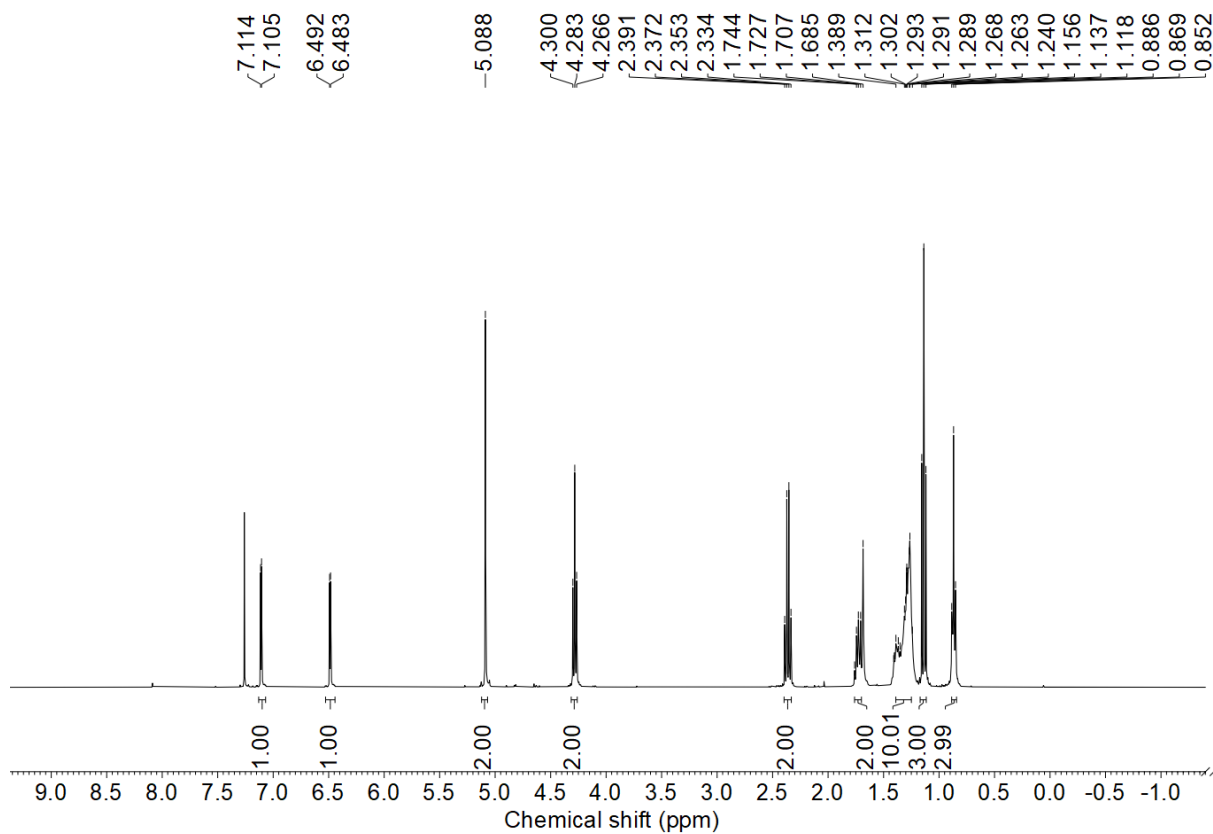

**Figure S98.** The <sup>1</sup>H-NMR spectrum of **7b**.

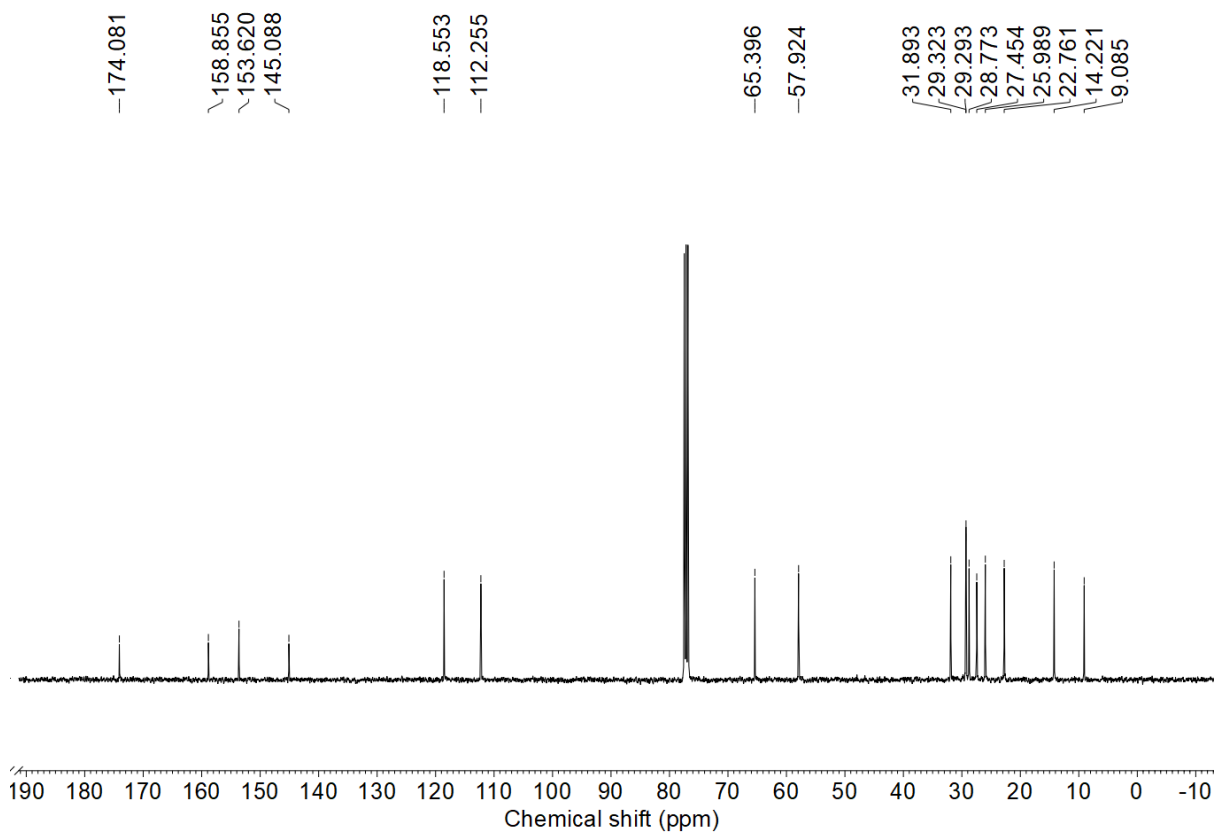

**Figure S99.** The  $^{13}\text{C}$ -NMR spectrum of **7b**.

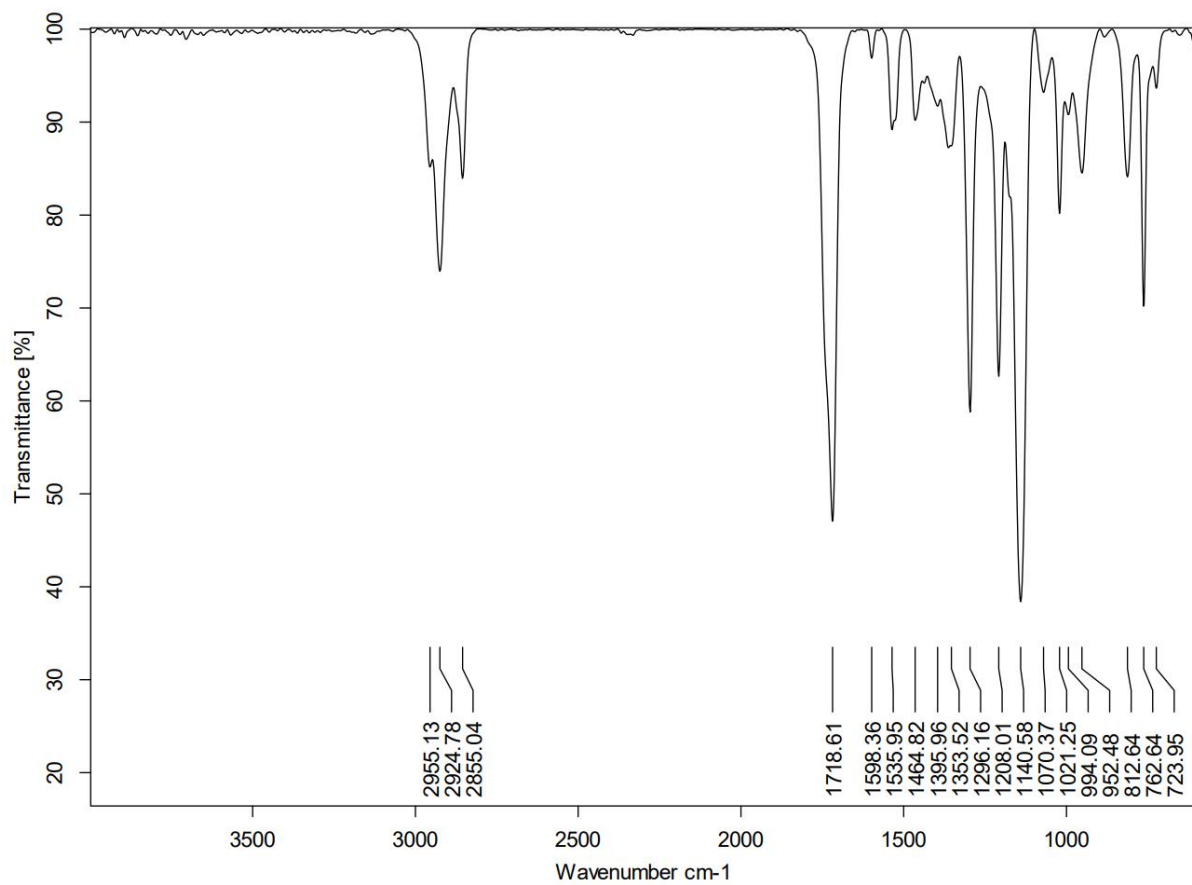

**Figure S100.** The FTIR spectrum of **7c**.

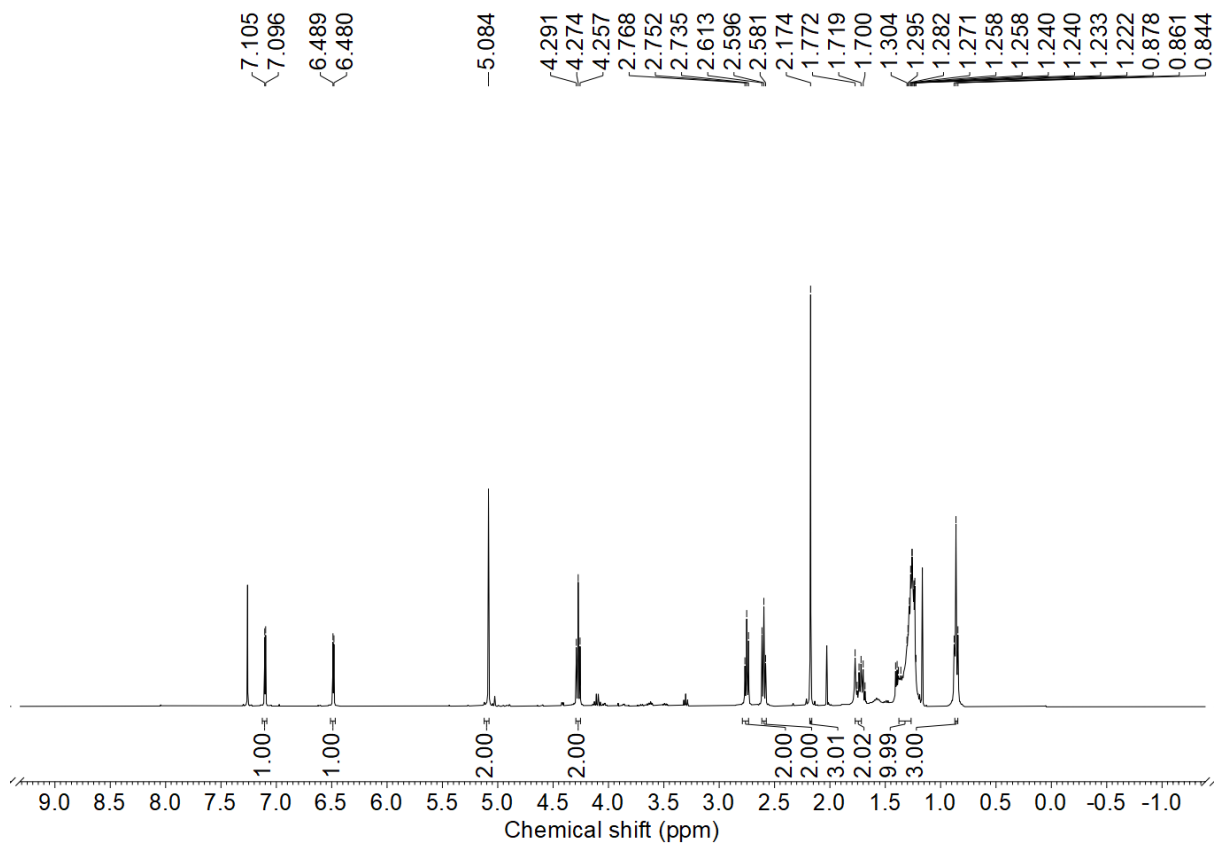

**Figure S101.** The  $^1\text{H}$ -NMR spectrum of **7c**.

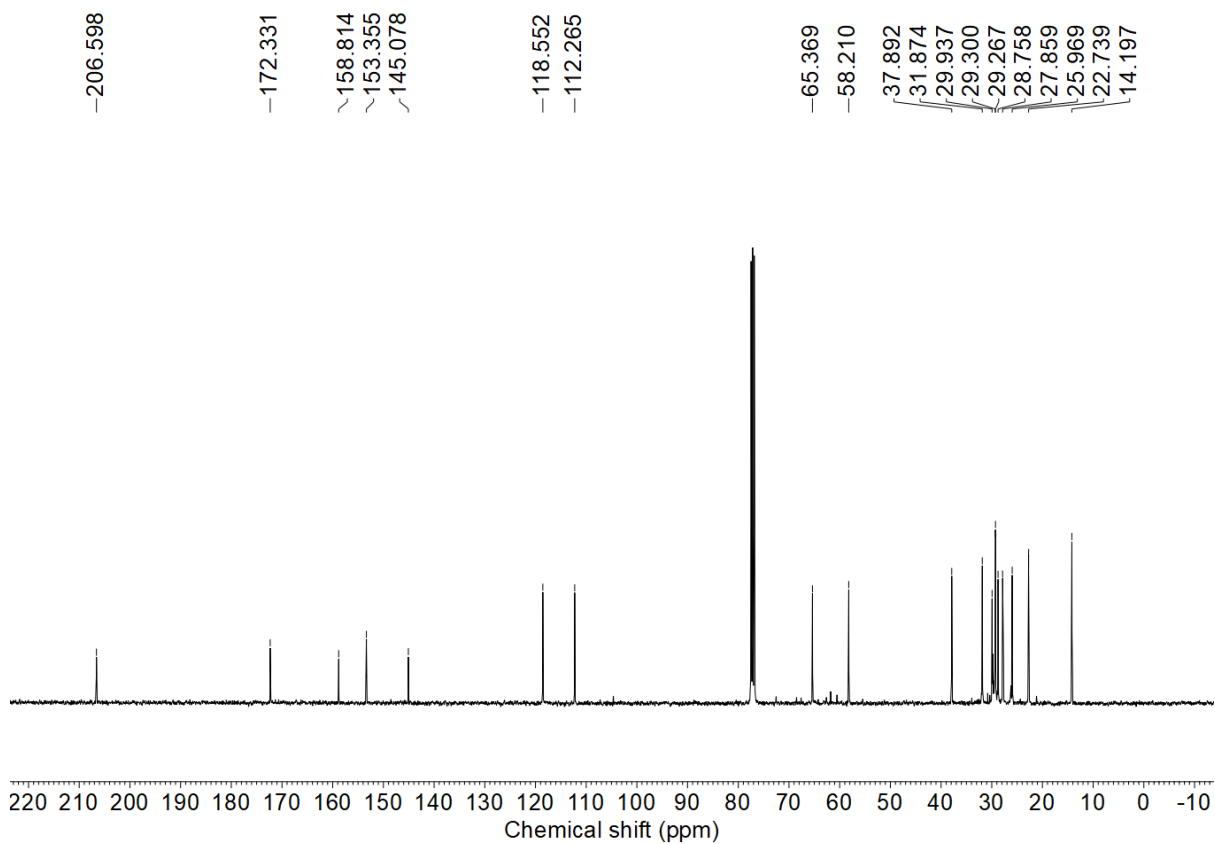

**Figure S102.** The  $^{13}\text{C}$ -NMR spectrum of **7c**.



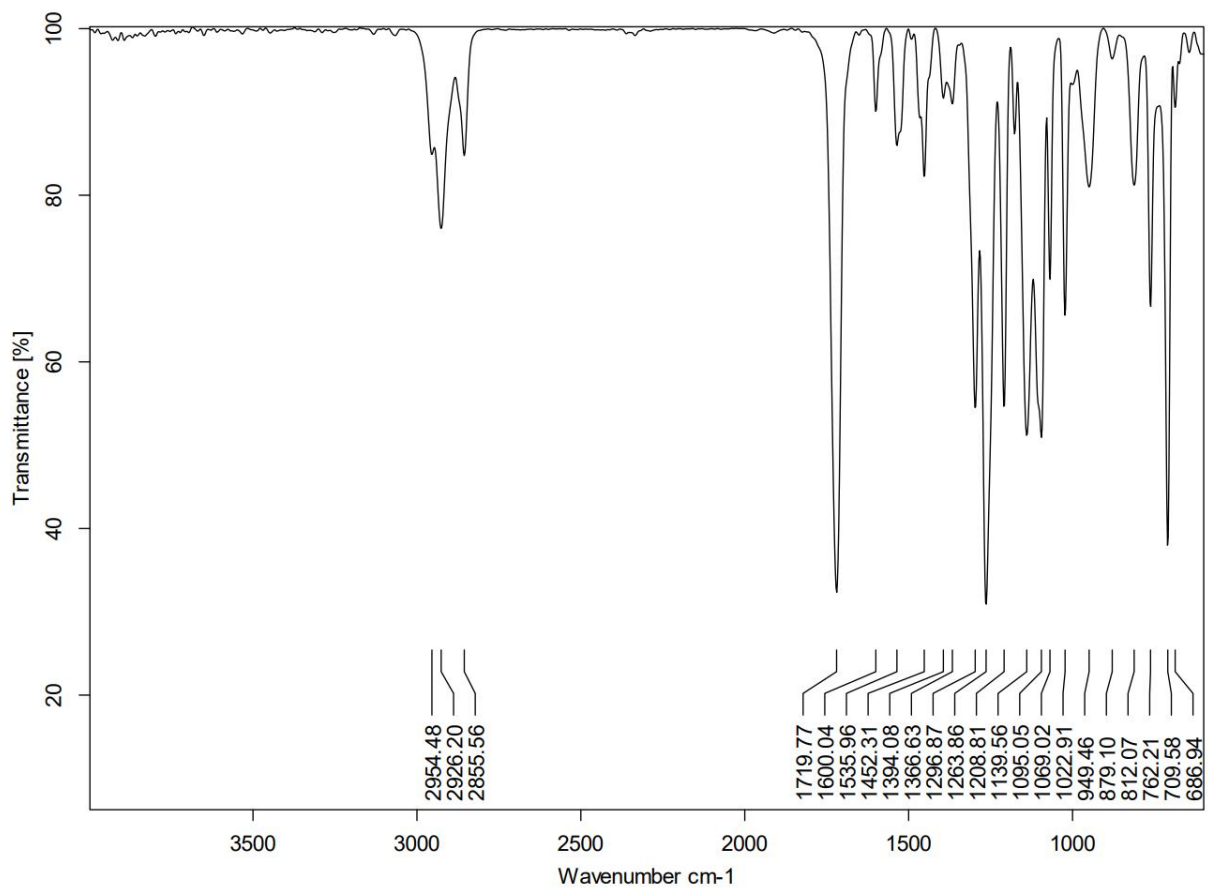

**Figure S103.** The FTIR spectrum of 7d.

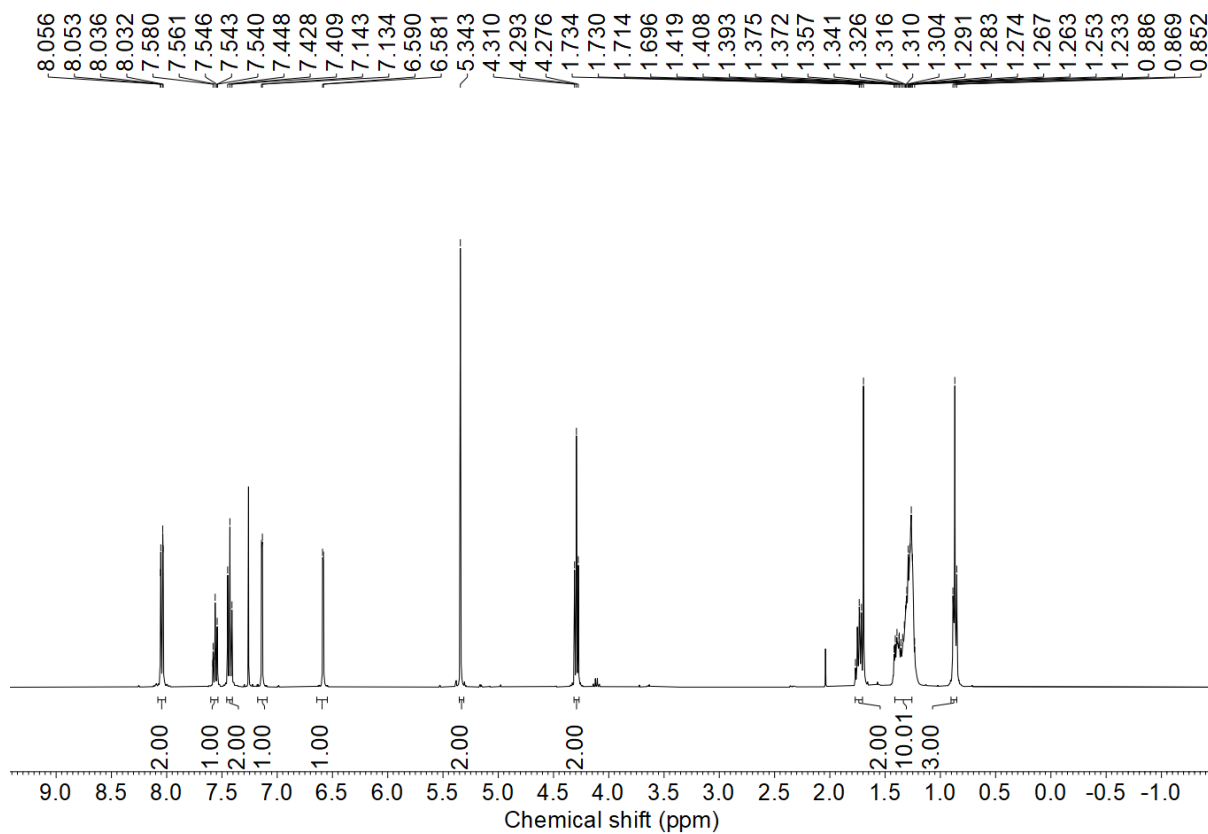

**Figure S104.** The <sup>1</sup>H-NMR spectrum of 7d.

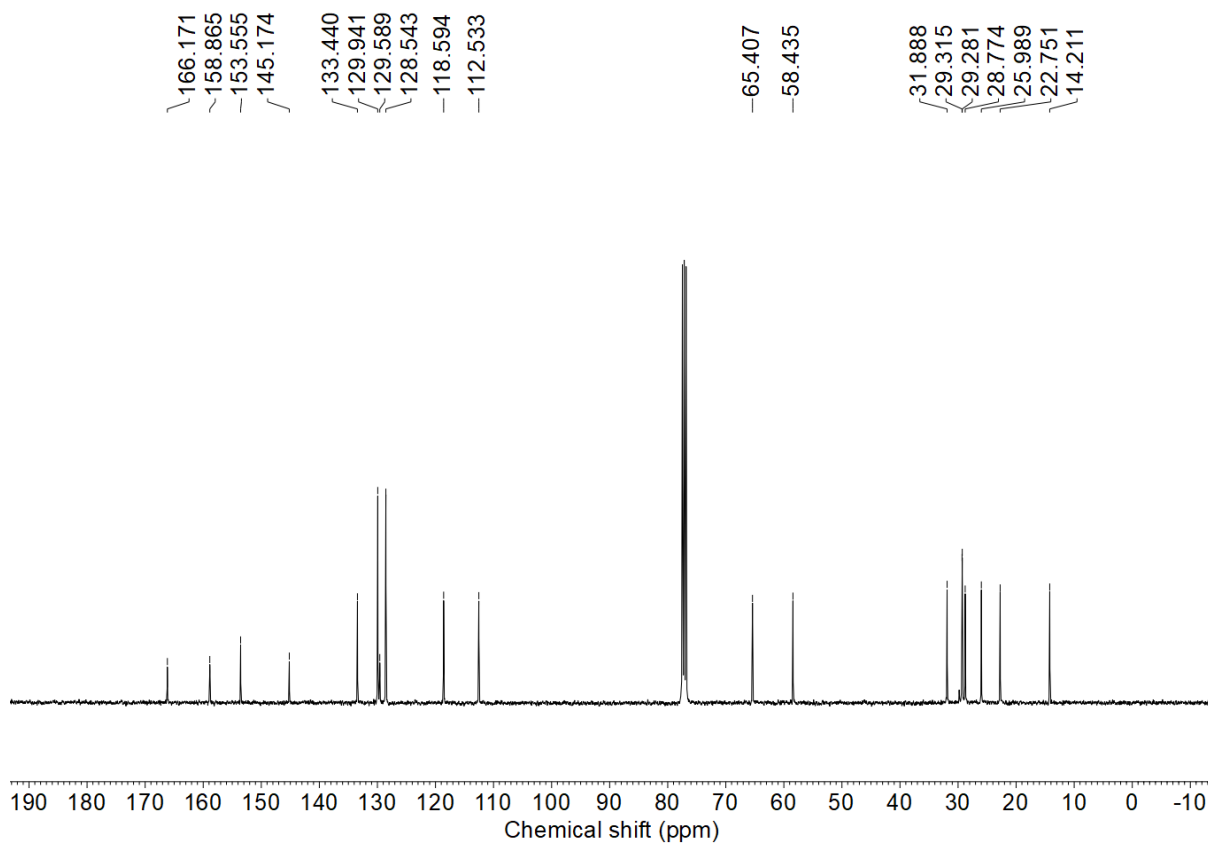

**Figure S105.** The  $^{13}\text{C}$ -NMR spectrum of **7d**.
